# Supplementary material
Source: Research Square preprint supplement (doi:10.21203/rs.3.rs-9822028/v1)
Supplement: Supplementary file 1 [file a980e6f0ffc1924b04bc57d2.xlsx]

## Sheet: Sheet1
Ensemble ID	Symbol	Cluster	Specificity Score
ENSMUSG00000085562	2610028E06Rik	1	0.996767
ENSMUSG00000021604	Irx4	1	0.985046
ENSMUSG00000047161	Chst9	1	0.97521
ENSMUSG00000031217	Efnb1	1	0.96731
ENSMUSG00000002944	Cd36	1	0.966048
ENSMUSG00000017688	Hnf4g	1	0.965196
ENSMUSG00000032899	Styk1	1	0.961104
ENSMUSG00000079070	Gm3985	1	0.959822
ENSMUSG00000019899	Lama2	1	0.958183
ENSMUSG00000040838	Gm11639	1	0.957245
ENSMUSG00000040610	Tlx3	1	0.953195
ENSMUSG00000025780	Itih5	1	0.951706
ENSMUSG00000035357	Pdzrn3	1	0.948667
ENSMUSG00000074274	D930028M14Rik	1	0.94733
ENSMUSG00000099938	C030007H22Rik	1	0.946117
ENSMUSG00000042961	Egflam	1	0.936282
ENSMUSG00000089934	4930473D10Rik	1	0.923652
ENSMUSG00000026686	Lmx1a	1	0.921508
ENSMUSG00000038765	Lmx1b	1	0.913605
ENSMUSG00000002688	Prkd1	1	0.908411
ENSMUSG00000052951	C130021I20Rik	1	0.907732
ENSMUSG00000098097	6530403H02Rik	1	0.907481
ENSMUSG00000085996	A830012C17Rik	1	0.905239
ENSMUSG00000013523	Bcas1	2	0.988201
ENSMUSG00000032517	Mobp	2	0.969013
ENSMUSG00000007097	Atp1a2	2	0.954581
ENSMUSG00000024411	Aqp4	2	0.952041
ENSMUSG00000026424	Gpr37l1	2	0.946396
ENSMUSG00000053279	Aldh1a1	2	0.943927
ENSMUSG00000041607	Mbp	2	0.941285
ENSMUSG00000031980	Agt	2	0.938764
ENSMUSG00000064356	mt-Atp8	2	0.936196
ENSMUSG00000050953	Gja1	2	0.935799
ENSMUSG00000032554	Trf	2	0.935683
ENSMUSG00000005716	Pvalb	2	0.933842
ENSMUSG00000018593	Sparc	2	0.927604
ENSMUSG00000064351	mt-Co1	2	0.920914
ENSMUSG00000002985	Apoe	2	0.918934
ENSMUSG00000004630	Pcp2	2	0.917793
ENSMUSG00000055333	Fat2	2	0.917289
ENSMUSG00000020591	Ntsr2	2	0.914144
ENSMUSG00000021508	Cxcl14	2	0.91241
ENSMUSG00000064337	mt-Rnr1	2	0.911462
ENSMUSG00000031762	Mt2	2	0.910115
ENSMUSG00000036570	Fxyd1	2	0.909216
ENSMUSG00000064363	mt-Nd4	2	0.902308
ENSMUSG00000030701	Plekhb1	2	0.902201
ENSMUSG00000027985	Lef1	3	0.995015
ENSMUSG00000021318	Gli3	3	0.994181
ENSMUSG00000098682	Otx2os1	3	0.990487
ENSMUSG00000087388	Gm12128	3	0.983442
ENSMUSG00000055415	Atp10b	3	0.977766
ENSMUSG00000000247	Lhx2	3	0.977264
ENSMUSG00000086126	Evx1os	3	0.971482
ENSMUSG00000005503	Evx1	3	0.954682
ENSMUSG00000053441	Adamts19	3	0.948748
ENSMUSG00000049676	Catsperg1	3	0.945512
ENSMUSG00000036907	C1ql2	3	0.942923
ENSMUSG00000025089	Gfra1	3	0.93501
ENSMUSG00000030592	Ryr1	3	0.927705
ENSMUSG00000001815	Evx2	3	0.92701
ENSMUSG00000022021	Diaph3	3	0.91512
ENSMUSG00000062319	Gm10115	3	0.911436
ENSMUSG00000048988	Elfn1	3	0.907252
ENSMUSG00000037664	Cdkn1c	3	0.900151
ENSMUSG00000031130	Brs3	4	0.999385
ENSMUSG00000026147	Col9a1	4	0.997643
ENSMUSG00000032667	Pon2	4	0.994979
ENSMUSG00000029759	Pon3	4	0.97876
ENSMUSG00000023959	Clic5	4	0.977764
ENSMUSG00000063681	Crb1	4	0.975498
ENSMUSG00000022246	Rai14	4	0.974995
ENSMUSG00000037664	Cdkn1c	4	0.972837
ENSMUSG00000024517	Grp	4	0.970108
ENSMUSG00000042607	Asb4	4	0.967615
ENSMUSG00000036103	Colec12	4	0.962543
ENSMUSG00000020169	Best3	4	0.962392
ENSMUSG00000071317	Bves	4	0.961255
ENSMUSG00000093386	1700120O09Rik	4	0.959145
ENSMUSG00000051079	Rgs13	4	0.95862
ENSMUSG00000014030	Pax5	4	0.958398
ENSMUSG00000051029	Serpinb1b	4	0.95288
ENSMUSG00000030043	Tacr1	4	0.951871
ENSMUSG00000026778	Prkcq	4	0.946452
ENSMUSG00000022441	Efcab6	4	0.932528
ENSMUSG00000045573	Penk	4	0.926089
ENSMUSG00000093472	4930438E09Rik	4	0.920517
ENSMUSG00000001119	Col6a1	4	0.919799
ENSMUSG00000004366	Sst	4	0.91933
ENSMUSG00000053963	Stum	4	0.917819
ENSMUSG00000086704	Gm14582	4	0.904629
ENSMUSG00000055653	Gpc3	4	0.901779
ENSMUSG00000005268	Prlr	4	0.901209
ENSMUSG00000087022	9130024F11Rik	5	1
ENSMUSG00000038331	Satb2	5	0.996983
ENSMUSG00000085510	Mir217hg	5	0.98166
ENSMUSG00000099706	Gm29536	5	0.977141
ENSMUSG00000090088	Gm15934	5	0.976759
ENSMUSG00000021359	Tfap2a	5	0.974289
ENSMUSG00000097049	6530411M01Rik	5	0.969984
ENSMUSG00000035528	Npffr2	5	0.967967
ENSMUSG00000093634	Gm10860	5	0.966849
ENSMUSG00000093386	1700120O09Rik	5	0.962754
ENSMUSG00000047161	Chst9	5	0.962631
ENSMUSG00000032023	Jhy	5	0.953602
ENSMUSG00000020467	Efemp1	5	0.953568
ENSMUSG00000055110	A630012P03Rik	5	0.947394
ENSMUSG00000028487	Bnc2	5	0.945968
ENSMUSG00000043013	Onecut1	5	0.945428
ENSMUSG00000040254	Sema3d	5	0.936969
ENSMUSG00000027695	Pld1	5	0.934097
ENSMUSG00000045053	Kcng3	5	0.934084
ENSMUSG00000099207	Gm10637	5	0.932703
ENSMUSG00000097834	Gm26911	5	0.928907
ENSMUSG00000045871	Slitrk6	5	0.926349
ENSMUSG00000022371	Col14a1	5	0.925725
ENSMUSG00000035258	Abi3bp	5	0.922712
ENSMUSG00000093662	Gm20649	5	0.919141
ENSMUSG00000045930	Clec14a	5	0.916796
ENSMUSG00000075549	Gm6878	5	0.915654
ENSMUSG00000060044	Tmem26	5	0.912678
ENSMUSG00000019880	Rspo3	5	0.910898
ENSMUSG00000086704	Gm14582	5	0.908996
ENSMUSG00000027188	Pamr1	5	0.902028
ENSMUSG00000093472	4930438E09Rik	5	0.901608
ENSMUSG00000030607	Acan	6	0.999089
ENSMUSG00000086044	A330043C09Rik	6	0.993955
ENSMUSG00000090667	Mdfic2	6	0.991459
ENSMUSG00000033149	Phldb2	6	0.991407
ENSMUSG00000100484	Gm7133	6	0.981214
ENSMUSG00000022758	P2rx6	6	0.98053
ENSMUSG00000055435	Maf	6	0.972138
ENSMUSG00000038058	Nod1	6	0.969533
ENSMUSG00000031596	Slc7a2	6	0.968982
ENSMUSG00000097178	2310002F09Rik	6	0.96502
ENSMUSG00000097441	Gm26633	6	0.964954
ENSMUSG00000032776	Mctp2	6	0.959292
ENSMUSG00000100303	2600014E21Rik	6	0.958033
ENSMUSG00000044505	Lingo4	6	0.949061
ENSMUSG00000086665	Gm13067	6	0.940689
ENSMUSG00000035513	Ntng2	6	0.939235
ENSMUSG00000074802	Gas2l3	6	0.938043
ENSMUSG00000032232	Cgnl1	6	0.9348
ENSMUSG00000031548	Sfrp1	6	0.932577
ENSMUSG00000046480	Scn4b	6	0.93132
ENSMUSG00000021613	Hapln1	6	0.930488
ENSMUSG00000018470	Kcnab3	6	0.927317
ENSMUSG00000074385	Gm10684	6	0.925786
ENSMUSG00000029313	Aff1	6	0.913619
ENSMUSG00000026976	Pax8	7	0.996637
ENSMUSG00000021685	Otp	7	0.993703
ENSMUSG00000059049	Frem1	7	0.990659
ENSMUSG00000087413	Gm11266	7	0.972395
ENSMUSG00000010175	Prox1	7	0.971506
ENSMUSG00000048747	E130114P18Rik	7	0.971122
ENSMUSG00000028736	Pax7	7	0.968919
ENSMUSG00000029151	Slc30a3	7	0.953074
ENSMUSG00000008575	Nfib	7	0.933559
ENSMUSG00000001911	Nfix	7	0.91481
ENSMUSG00000064294	Aox3	7	0.914365
ENSMUSG00000020422	Tns3	7	0.908727
ENSMUSG00000099957	2610027F03Rik	7	0.90335
ENSMUSG00000058665	En1	7	0.900683
ENSMUSG00000038805	Six3	8	0.99678
ENSMUSG00000033007	Asic4	8	0.990713
ENSMUSG00000087095	Emx2os	8	0.984682
ENSMUSG00000021848	Otx2	8	0.981639
ENSMUSG00000087618	Gm14114	8	0.979259
ENSMUSG00000015053	Gata2	8	0.977937
ENSMUSG00000098682	Otx2os1	8	0.977473
ENSMUSG00000093460	Six3os1	8	0.973467
ENSMUSG00000028717	Tal1	8	0.96428
ENSMUSG00000056332	Gm16294	8	0.961033
ENSMUSG00000015619	Gata3	8	0.960461
ENSMUSG00000071317	Bves	8	0.949798
ENSMUSG00000029595	Lhx5	8	0.948465
ENSMUSG00000019848	Popdc3	8	0.946
ENSMUSG00000029819	Npy	8	0.935183
ENSMUSG00000098649	Gm27199	8	0.930981
ENSMUSG00000045731	Pnoc	8	0.924324
ENSMUSG00000086496	Gm14204	8	0.909859
ENSMUSG00000043969	Emx2	8	0.907369
ENSMUSG00000043366	Olfr78	9	0.995268
ENSMUSG00000070719	Pla2g4d	9	0.994114
ENSMUSG00000027518	1700021F07Rik	9	0.9932
ENSMUSG00000000889	Dbh	9	0.988735
ENSMUSG00000055368	Slc6a2	9	0.985357
ENSMUSG00000102098	2310016D03Rik	9	0.985027
ENSMUSG00000007946	Phox2a	9	0.984806
ENSMUSG00000000159	Igsf5	9	0.981617
ENSMUSG00000054320	Lrrc36	9	0.977956
ENSMUSG00000000214	Th	9	0.975532
ENSMUSG00000031665	Sall1	9	0.975247
ENSMUSG00000000157	Itgb2l	9	0.974977
ENSMUSG00000086467	4930571N24Rik	9	0.974114
ENSMUSG00000057346	Apol9a	9	0.973606
ENSMUSG00000037580	Gch1	9	0.969345
ENSMUSG00000102785	Gm2447	9	0.966911
ENSMUSG00000061171	Slc38a11	9	0.963389
ENSMUSG00000085008	Dbhos	9	0.961517
ENSMUSG00000022860	Chodl	9	0.959723
ENSMUSG00000098720	Gm27239	9	0.958765
ENSMUSG00000027801	Tm4sf4	9	0.958081
ENSMUSG00000027800	Tm4sf1	9	0.956699
ENSMUSG00000025932	Eya1	9	0.956186
ENSMUSG00000031492	Chrnb3	9	0.954987
ENSMUSG00000100650	Gm28807	9	0.953651
ENSMUSG00000048582	Gja3	9	0.949811
ENSMUSG00000023964	Calcr	9	0.948796
ENSMUSG00000087455	5330411J11Rik	9	0.948625
ENSMUSG00000097617	Gm10687	9	0.948305
ENSMUSG00000040280	Ndufa4l2	9	0.947993
ENSMUSG00000026483	Niban1	9	0.946135
ENSMUSG00000026971	Itgb6	9	0.945413
ENSMUSG00000004730	Adgre1	9	0.943635
ENSMUSG00000030838	Ush1c	9	0.938483
ENSMUSG00000049115	Agtr1a	9	0.938181
ENSMUSG00000086876	Gm12828	9	0.938006
ENSMUSG00000056423	Uts2b	9	0.937253
ENSMUSG00000091345	Col6a5	9	0.935466
ENSMUSG00000029219	Slc10a4	9	0.932951
ENSMUSG00000012520	Phox2b	9	0.928494
ENSMUSG00000024907	Gal	9	0.926654
ENSMUSG00000086152	Gm11454	9	0.922996
ENSMUSG00000024565	Sall3	9	0.922294
ENSMUSG00000020182	Ddc	9	0.920094
ENSMUSG00000086391	1700042O10Rik	9	0.91912
ENSMUSG00000081849	Zar1-ps	9	0.917917
ENSMUSG00000058488	Kl	9	0.908728
ENSMUSG00000023439	Gnb3	9	0.905907
ENSMUSG00000046828	Mettl21e	9	0.905323
ENSMUSG00000073968	Trim68	9	0.903044
ENSMUSG00000031491	Chrna6	9	0.902377
ENSMUSG00000074555	Gm10714	9	0.901486
ENSMUSG00000021685	Otp	10	0.990826
ENSMUSG00000021680	Crhbp	10	0.969832
ENSMUSG00000045731	Pnoc	10	0.966033
ENSMUSG00000098649	Gm27199	10	0.964384
ENSMUSG00000047935	Sox1ot	10	0.958771
ENSMUSG00000085221	Gm11309	10	0.946174
ENSMUSG00000015619	Gata3	10	0.931977
ENSMUSG00000075302	Erich2	10	0.917686
ENSMUSG00000026976	Pax8	10	0.916543
ENSMUSG00000050777	Tmem37	10	0.902001
ENSMUSG00000020007	Il20ra	11	0.996925
ENSMUSG00000030666	Calcb	11	0.989898
ENSMUSG00000099938	C030007H22Rik	11	0.987162
ENSMUSG00000032690	Oas2	11	0.985036
ENSMUSG00000019936	Epyc	11	0.983796
ENSMUSG00000030669	Calca	11	0.983285
ENSMUSG00000025780	Itih5	11	0.976568
ENSMUSG00000050473	Slc35d3	11	0.976408
ENSMUSG00000028780	Sema3c	11	0.96609
ENSMUSG00000091455	Otogl	11	0.963938
ENSMUSG00000040838	Gm11639	11	0.959453
ENSMUSG00000021680	Crhbp	11	0.958962
ENSMUSG00000058624	Gda	11	0.949572
ENSMUSG00000029381	Shroom3	11	0.945065
ENSMUSG00000028487	Bnc2	11	0.944992
ENSMUSG00000019890	Nts	11	0.94382
ENSMUSG00000032440	Tgfbr2	11	0.938697
ENSMUSG00000045404	Kcnk13	11	0.934796
ENSMUSG00000049796	Crh	11	0.934553
ENSMUSG00000085562	2610028E06Rik	11	0.927031
ENSMUSG00000026686	Lmx1a	11	0.92695
ENSMUSG00000047642	D930020B18Rik	11	0.921261
ENSMUSG00000024256	Adcyap1	11	0.91162
ENSMUSG00000034413	Neurl1b	11	0.909405
ENSMUSG00000036853	Mcoln3	11	0.908634
ENSMUSG00000020961	Ston2	11	0.907372
ENSMUSG00000084910	C630043F03Rik	11	0.905846
ENSMUSG00000032369	Plscr1	11	0.903871
ENSMUSG00000023945	Slc5a7	11	0.900033
ENSMUSG00000027400	Pdyn	12	0.995047
ENSMUSG00000033502	Cdc14a	12	0.988993
ENSMUSG00000047139	Cd24a	12	0.988668
ENSMUSG00000030976	Tex36	12	0.987547
ENSMUSG00000046167	Gldn	12	0.984963
ENSMUSG00000019935	Slc17a8	12	0.980172
ENSMUSG00000007655	Cav1	12	0.979011
ENSMUSG00000033060	Lmo7	12	0.975293
ENSMUSG00000026826	Nr4a2	12	0.97002
ENSMUSG00000054555	Adam12	12	0.964795
ENSMUSG00000063260	Syt10	12	0.957949
ENSMUSG00000079058	Adam34	12	0.947158
ENSMUSG00000079679	Vwde	12	0.944843
ENSMUSG00000042064	Myo3b	12	0.939694
ENSMUSG00000040998	Npnt	12	0.928958
ENSMUSG00000034361	Cpne2	12	0.9271
ENSMUSG00000085264	Gm15581	12	0.92663
ENSMUSG00000097354	2310001H17Rik	12	0.920068
ENSMUSG00000000214	Th	12	0.907219
ENSMUSG00000019230	Lhx9	12	0.906912
ENSMUSG00000067578	Cbln4	12	0.905189
ENSMUSG00000031613	Hpgd	12	0.90453
ENSMUSG00000026866	Kynu	13	0.99537
ENSMUSG00000035273	Hpse	13	0.994636
ENSMUSG00000052471	ENSMUSG00000052471	13	0.992937
ENSMUSG00000086600	C030005K06Rik	13	0.979319
ENSMUSG00000020432	Tcn2	13	0.963082
ENSMUSG00000020053	Igf1	13	0.949762
ENSMUSG00000010175	Prox1	13	0.94869
ENSMUSG00000024330	Col11a2	13	0.947116
ENSMUSG00000020734	Grin2c	13	0.943915
ENSMUSG00000097289	ENSMUSG00000097289	13	0.93291
ENSMUSG00000062210	Tnfaip8	13	0.928519
ENSMUSG00000025592	Dach2	13	0.925483
ENSMUSG00000091519	Skor2	13	0.920708
ENSMUSG00000056656	Apol8	13	0.919034
ENSMUSG00000087658	Hotairm1	13	0.914927
ENSMUSG00000027270	Lamp5	13	0.90203
ENSMUSG00000020407	Upp1	13	0.900694
ENSMUSG00000028717	Tal1	14	0.994228
ENSMUSG00000019913	Sim1	14	0.988375
ENSMUSG00000092242	Gm20515	14	0.983636
ENSMUSG00000087095	Emx2os	14	0.980815
ENSMUSG00000074637	Sox2	14	0.97353
ENSMUSG00000015053	Gata2	14	0.962301
ENSMUSG00000021848	Otx2	14	0.961558
ENSMUSG00000087413	Gm11266	14	0.955056
ENSMUSG00000092355	ENSMUSG00000092355	14	0.949981
ENSMUSG00000015619	Gata3	14	0.93397
ENSMUSG00000053747	Sox14	14	0.930915
ENSMUSG00000092196	Gm38505	14	0.926571
ENSMUSG00000084530	ENSMUSG00000084530	14	0.902355
ENSMUSG00000020218	Wif1	15	0.998529
ENSMUSG00000059588	Calcrl	15	0.991026
ENSMUSG00000036907	C1ql2	15	0.989681
ENSMUSG00000029503	P2rx2	15	0.989101
ENSMUSG00000012520	Phox2b	15	0.986261
ENSMUSG00000025932	Eya1	15	0.981616
ENSMUSG00000051920	Rspo2	15	0.98118
ENSMUSG00000017897	Eya2	15	0.980863
ENSMUSG00000024256	Adcyap1	15	0.969231
ENSMUSG00000024517	Grp	15	0.968938
ENSMUSG00000097289	ENSMUSG00000097289	15	0.945039
ENSMUSG00000034151	Zbbx	15	0.943776
ENSMUSG00000028457	Atp8b5	15	0.94264
ENSMUSG00000086541	Has2os	15	0.937904
ENSMUSG00000000159	Igsf5	15	0.935508
ENSMUSG00000036103	Colec12	15	0.932564
ENSMUSG00000036528	Ppfibp2	15	0.931706
ENSMUSG00000043673	Kcns3	15	0.928049
ENSMUSG00000042385	Gzmk	15	0.921711
ENSMUSG00000097796	ENSMUSG00000097796	15	0.918962
ENSMUSG00000025776	Crispld1	15	0.906815
ENSMUSG00000024598	Fbn2	15	0.906781
ENSMUSG00000047021	Cfap65	15	0.905844
ENSMUSG00000030790	Adm	16	0.993829
ENSMUSG00000035021	Baz1a	16	0.991664
ENSMUSG00000043822	Adamtsl5	16	0.991396
ENSMUSG00000028028	Alpk1	16	0.990023
ENSMUSG00000030607	Acan	16	0.985084
ENSMUSG00000057606	Colq	16	0.979885
ENSMUSG00000078942	Naip6	16	0.977355
ENSMUSG00000100484	Gm7133	16	0.971166
ENSMUSG00000030771	ENSMUSG00000030771	16	0.965363
ENSMUSG00000084850	Gm12092	16	0.964886
ENSMUSG00000021255	Esrrb	16	0.964379
ENSMUSG00000071203	Naip5	16	0.959177
ENSMUSG00000034959	Rubcnl	16	0.955973
ENSMUSG00000029304	Spp1	16	0.953323
ENSMUSG00000046480	Scn4b	16	0.952285
ENSMUSG00000097441	Gm26633	16	0.948921
ENSMUSG00000074385	Gm10684	16	0.946373
ENSMUSG00000102813	Gm37795	16	0.945631
ENSMUSG00000024485	Slc4a9	16	0.945526
ENSMUSG00000086665	Gm13067	16	0.944602
ENSMUSG00000032776	Mctp2	16	0.942792
ENSMUSG00000021997	Lrrc63	16	0.942609
ENSMUSG00000029370	Rassf6	16	0.937664
ENSMUSG00000046318	Ccbe1	16	0.937268
ENSMUSG00000024900	Cpt1a	16	0.936606
ENSMUSG00000022358	Fbxo32	16	0.933151
ENSMUSG00000083086	Gm15531	16	0.920424
ENSMUSG00000031596	Slc7a2	16	0.915098
ENSMUSG00000026611	Spata17	16	0.911753
ENSMUSG00000097927	Gm6999	16	0.909666
ENSMUSG00000045246	Kcng4	16	0.905726
ENSMUSG00000055435	Maf	16	0.903354
ENSMUSG00000086349	Gm13497	17	1
ENSMUSG00000052180	Serpinb6c	17	0.99002
ENSMUSG00000041730	Prrxl1	17	0.989262
ENSMUSG00000034555	Tex16	17	0.974568
ENSMUSG00000027318	Adam33	17	0.969996
ENSMUSG00000036198	Arhgap36	17	0.955337
ENSMUSG00000028040	Efna4	17	0.951768
ENSMUSG00000033327	Tnxb	17	0.935796
ENSMUSG00000037469	Acp7	17	0.93441
ENSMUSG00000013584	Aldh1a2	17	0.928824
ENSMUSG00000031212	Pgr15l	17	0.928612
ENSMUSG00000042501	Cpa6	17	0.921598
ENSMUSG00000062372	Otof	17	0.915584
ENSMUSG00000070576	Mn1	17	0.908892
ENSMUSG00000097178	2310002F09Rik	17	0.902973
ENSMUSG00000100341	Gm29478	18	0.987192
ENSMUSG00000036972	Zic4	18	0.985948
ENSMUSG00000090272	Mndal	18	0.979935
ENSMUSG00000045672	Col27a1	18	0.972868
ENSMUSG00000020428	Gabra6	18	0.972564
ENSMUSG00000023232	Serinc2	18	0.972141
ENSMUSG00000033740	St18	18	0.969438
ENSMUSG00000035305	Ror1	18	0.96659
ENSMUSG00000031712	Il15	18	0.962333
ENSMUSG00000070570	Slc17a7	18	0.953992
ENSMUSG00000032368	Zic1	18	0.952023
ENSMUSG00000048332	Lhfp	18	0.950037
ENSMUSG00000075465	Gm10837	18	0.949129
ENSMUSG00000097636	Mirt1	18	0.94589
ENSMUSG00000061524	Zic2	18	0.941552
ENSMUSG00000031520	Vegfc	18	0.94134
ENSMUSG00000034584	Exph5	18	0.938185
ENSMUSG00000047881	Rell1	18	0.933793
ENSMUSG00000001741	Il16	18	0.928616
ENSMUSG00000020734	Grin2c	18	0.924594
ENSMUSG00000004151	Etv1	18	0.920407
ENSMUSG00000075020	Mir670hg	18	0.919405
ENSMUSG00000027168	Pax6	18	0.918237
ENSMUSG00000004347	Pde1c	18	0.917691
ENSMUSG00000042686	Jph1	18	0.91323
ENSMUSG00000093765	Gm20658	18	0.912865
ENSMUSG00000015202	Cnksr3	18	0.912099
ENSMUSG00000055333	Fat2	18	0.91152
ENSMUSG00000097589	Dleu2	18	0.908149
ENSMUSG00000102406	A730094K22Rik	18	0.904087
ENSMUSG00000021337	Scgn	19	0.996575
ENSMUSG00000086600	C030005K06Rik	19	0.986444
ENSMUSG00000031825	Crispld2	19	0.983733
ENSMUSG00000023945	Slc5a7	19	0.982123
ENSMUSG00000052942	Glis3	19	0.978721
ENSMUSG00000062210	Tnfaip8	19	0.970997
ENSMUSG00000023484	Prph	19	0.967123
ENSMUSG00000028339	Col15a1	19	0.956086
ENSMUSG00000043441	Gpr149	19	0.951873
ENSMUSG00000092094	Zfp804b	19	0.94196
ENSMUSG00000102814	Gm37812	19	0.926628
ENSMUSG00000035459	Stab2	19	0.919119
ENSMUSG00000099065	ENSMUSG00000099065	19	0.914892
ENSMUSG00000040514	Tex47	19	0.902655
ENSMUSG00000033207	Mamdc2	19	0.900988
ENSMUSG00000017417	Plxdc1	19	0.900677
ENSMUSG00000050103	Agmo	20	1
ENSMUSG00000047497	Adamts12	20	0.989238
ENSMUSG00000037469	Acp7	20	0.988256
ENSMUSG00000097652	Mhrt	20	0.96496
ENSMUSG00000034151	Zbbx	20	0.961154
ENSMUSG00000038760	Trhr	20	0.958269
ENSMUSG00000031613	Hpgd	20	0.956755
ENSMUSG00000050248	Evc2	20	0.953106
ENSMUSG00000051029	Serpinb1b	20	0.952071
ENSMUSG00000049744	Arhgap15	20	0.932879
ENSMUSG00000102420	Gm37464	20	0.924855
ENSMUSG00000036357	Gpr101	20	0.918359
ENSMUSG00000101445	Gm28932	20	0.905949
ENSMUSG00000087145	Gm12665	20	0.900132
ENSMUSG00000073804	Nps	21	0.998815
ENSMUSG00000101792	Gm28447	21	0.994738
ENSMUSG00000058400	Qrfpr	21	0.990911
ENSMUSG00000031616	Ednra	21	0.985863
ENSMUSG00000086122	Gm14507	21	0.9856
ENSMUSG00000024154	Gtf2a1l	21	0.983978
ENSMUSG00000026826	Nr4a2	21	0.974967
ENSMUSG00000032511	Scn5a	21	0.971095
ENSMUSG00000063260	Syt10	21	0.966882
ENSMUSG00000029602	Rasal1	21	0.962657
ENSMUSG00000045532	C1ql1	21	0.953097
ENSMUSG00000086451	4933431K23Rik	21	0.945052
ENSMUSG00000079070	Gm3985	21	0.933279
ENSMUSG00000071265	1700086L19Rik	21	0.932184
ENSMUSG00000033060	Lmo7	21	0.920576
ENSMUSG00000096629	Gm3383	21	0.919378
ENSMUSG00000022237	Ankrd33b	21	0.915393
ENSMUSG00000026994	Galnt3	21	0.914314
ENSMUSG00000024907	Gal	21	0.907546
ENSMUSG00000029563	Foxp2	21	0.905427
ENSMUSG00000026875	Traf1	21	0.904658
ENSMUSG00000102420	Gm37464	21	0.903847
ENSMUSG00000041798	Gck	21	0.902096
ENSMUSG00000021676	Iqgap2	21	0.901963
ENSMUSG00000028871	Rspo1	21	0.901489
ENSMUSG00000028736	Pax7	22	1
ENSMUSG00000020432	Tcn2	22	0.984404
ENSMUSG00000029151	Slc30a3	22	0.980816
ENSMUSG00000020902	Ntn1	22	0.978934
ENSMUSG00000020905	Usp43	22	0.97307
ENSMUSG00000034959	Rubcnl	22	0.954194
ENSMUSG00000020963	Tshr	22	0.948905
ENSMUSG00000053153	Spag16	22	0.938688
ENSMUSG00000046808	Atp10d	22	0.922924
ENSMUSG00000029595	Lhx5	22	0.920618
ENSMUSG00000070880	Gad1	22	0.917909
ENSMUSG00000075302	Erich2	22	0.90474
ENSMUSG00000087539	Gm13584	23	0.999496
ENSMUSG00000069378	Prdm6	23	0.992979
ENSMUSG00000022021	Diaph3	23	0.984939
ENSMUSG00000032323	Cyp11a1	23	0.983634
ENSMUSG00000056215	Lrguk	23	0.97034
ENSMUSG00000085555	2610035F20Rik	23	0.963181
ENSMUSG00000041482	Piezo2	23	0.961872
ENSMUSG00000050447	Lypd6	23	0.957595
ENSMUSG00000025405	Inhbc	23	0.953095
ENSMUSG00000063681	Crb1	23	0.952549
ENSMUSG00000053441	Adamts19	23	0.952345
ENSMUSG00000054667	Irs4	23	0.951885
ENSMUSG00000043659	Npsr1	23	0.951145
ENSMUSG00000044361	BC024139	23	0.949788
ENSMUSG00000000247	Lhx2	23	0.931287
ENSMUSG00000028487	Bnc2	23	0.92531
ENSMUSG00000019230	Lhx9	23	0.917126
ENSMUSG00000082715	Gm11633	23	0.910856
ENSMUSG00000086126	Evx1os	23	0.906925
ENSMUSG00000074274	D930028M14Rik	23	0.905434
ENSMUSG00000086254	3100003L05Rik	23	0.901011
ENSMUSG00000091519	Skor2	24	0.999454
ENSMUSG00000028707	Dmbx1	24	0.994471
ENSMUSG00000053747	Sox14	24	0.986214
ENSMUSG00000041771	Slc24a4	24	0.963697
ENSMUSG00000022245	Skor1	24	0.939896
ENSMUSG00000098649	Gm27199	24	0.927329
ENSMUSG00000085811	Cep112it	24	0.925365
ENSMUSG00000041644	Slc5a12	24	0.925121
ENSMUSG00000082178	Gm11307	24	0.909966
ENSMUSG00000022997	Wnt1	24	0.90674
ENSMUSG00000083226	Gm7831	25	0.995312
ENSMUSG00000098072	Gm26995	25	0.989404
ENSMUSG00000021919	Chat	25	0.984622
ENSMUSG00000097794	Gm2990	25	0.97944
ENSMUSG00000061815	Rufy4	25	0.977312
ENSMUSG00000041669	Prima1	25	0.976287
ENSMUSG00000085393	Gm11280	25	0.97617
ENSMUSG00000031766	Slc12a3	25	0.975225
ENSMUSG00000031075	Ano1	25	0.972818
ENSMUSG00000085804	Gm12973	25	0.968661
ENSMUSG00000032440	Tgfbr2	25	0.965972
ENSMUSG00000103286	Gm5850	25	0.962011
ENSMUSG00000065191	Gm23458	25	0.95625
ENSMUSG00000085564	Gm12198	25	0.947247
ENSMUSG00000037106	Fer1l6	25	0.941566
ENSMUSG00000029219	Slc10a4	25	0.936817
ENSMUSG00000010797	Wnt2	25	0.931654
ENSMUSG00000023945	Slc5a7	25	0.928739
ENSMUSG00000023439	Gnb3	25	0.927307
ENSMUSG00000031616	Ednra	25	0.919332
ENSMUSG00000055865	Tafa3	25	0.919118
ENSMUSG00000055322	Tns1	25	0.917931
ENSMUSG00000074766	Ism1	25	0.914614
ENSMUSG00000040624	Plekhg1	25	0.90312
ENSMUSG00000029361	Nos1	25	0.901086
ENSMUSG00000056880	Gadl1	25	0.900922
ENSMUSG00000053368	Rxfp2	26	0.993964
ENSMUSG00000051397	Tacstd2	26	0.993391
ENSMUSG00000086122	Gm14507	26	0.986963
ENSMUSG00000013584	Aldh1a2	26	0.985564
ENSMUSG00000102420	Gm37464	26	0.983056
ENSMUSG00000079679	Vwde	26	0.980344
ENSMUSG00000000359	Rem1	26	0.978423
ENSMUSG00000079058	Adam34	26	0.976918
ENSMUSG00000097770	ENSMUSG00000097770	26	0.974377
ENSMUSG00000089901	Gm8113	26	0.969697
ENSMUSG00000024517	Grp	26	0.966444
ENSMUSG00000085264	Gm15581	26	0.957919
ENSMUSG00000024011	Pi16	26	0.955554
ENSMUSG00000042010	Acacb	26	0.954576
ENSMUSG00000032899	Styk1	26	0.950159
ENSMUSG00000079070	Gm3985	26	0.944499
ENSMUSG00000027400	Pdyn	26	0.94387
ENSMUSG00000029123	Stk32b	26	0.943559
ENSMUSG00000007655	Cav1	26	0.942268
ENSMUSG00000085603	Gm11346	26	0.941434
ENSMUSG00000086451	4933431K23Rik	26	0.941231
ENSMUSG00000036904	Fzd8	26	0.941001
ENSMUSG00000045532	C1ql1	26	0.932136
ENSMUSG00000029563	Foxp2	26	0.924231
ENSMUSG00000005087	Cd44	26	0.921799
ENSMUSG00000026679	Enkur	26	0.920496
ENSMUSG00000056215	Lrguk	26	0.914773
ENSMUSG00000097497	Gm26652	26	0.907135
ENSMUSG00000029552	Tes	26	0.904742
ENSMUSG00000026393	Nek7	26	0.902135
ENSMUSG00000053153	Spag16	26	0.900212
ENSMUSG00000042189	Tekt3	27	0.998227
ENSMUSG00000100345	Gm29418	27	0.995612
ENSMUSG00000049107	Ntf3	27	0.984089
ENSMUSG00000051920	Rspo2	27	0.977777
ENSMUSG00000033082	Clec1a	27	0.962484
ENSMUSG00000012819	Cdh23	27	0.954856
ENSMUSG00000075549	Gm6878	27	0.938476
ENSMUSG00000039004	Bmp6	27	0.932967
ENSMUSG00000032530	Lyzl4	27	0.924826
ENSMUSG00000048747	E130114P18Rik	27	0.90834
ENSMUSG00000031520	Vegfc	27	0.901943
ENSMUSG00000022952	Runx1	28	0.998361
ENSMUSG00000019762	Iyd	28	0.991671
ENSMUSG00000063409	Lrrc43	28	0.98995
ENSMUSG00000034009	Rxfp1	28	0.988473
ENSMUSG00000093650	Gm20631	28	0.98083
ENSMUSG00000025946	Pth2r	28	0.979111
ENSMUSG00000066842	Hmcn1	28	0.974485
ENSMUSG00000018581	Dnah11	28	0.973944
ENSMUSG00000047497	Adamts12	28	0.958337
ENSMUSG00000024647	Cbln2	28	0.956017
ENSMUSG00000057722	Lepr	28	0.955046
ENSMUSG00000043168	4930426D05Rik	28	0.94789
ENSMUSG00000001435	Col18a1	28	0.946342
ENSMUSG00000047021	Cfap65	28	0.939208
ENSMUSG00000085806	Gm12023	28	0.935178
ENSMUSG00000062319	Gm10115	28	0.933497
ENSMUSG00000048776	Pthlh	28	0.930056
ENSMUSG00000102862	Gm37640	28	0.925664
ENSMUSG00000063796	Slc22a8	28	0.922658
ENSMUSG00000035778	Ggta1	28	0.908467
ENSMUSG00000055415	Atp10b	28	0.908416
ENSMUSG00000019846	Lama4	29	0.990963
ENSMUSG00000025780	Itih5	29	0.988339
ENSMUSG00000087145	Gm12665	29	0.986005
ENSMUSG00000029236	Nmu	29	0.980865
ENSMUSG00000100197	Gm28638	29	0.980724
ENSMUSG00000044034	Npb	29	0.973671
ENSMUSG00000032332	Col12a1	29	0.971568
ENSMUSG00000032369	Plscr1	29	0.96662
ENSMUSG00000022206	Npr3	29	0.96651
ENSMUSG00000030249	Abcc9	29	0.965739
ENSMUSG00000026994	Galnt3	29	0.961111
ENSMUSG00000097752	Gm26688	29	0.960035
ENSMUSG00000046561	Arsj	29	0.95538
ENSMUSG00000087241	Gm11844	29	0.947637
ENSMUSG00000026778	Prkcq	29	0.938886
ENSMUSG00000055114	Anxa13	29	0.935791
ENSMUSG00000041361	Myzap	29	0.933915
ENSMUSG00000061762	Tac1	29	0.922458
ENSMUSG00000050473	Slc35d3	29	0.917523
ENSMUSG00000040514	Tex47	29	0.914787
ENSMUSG00000073530	Pappa2	29	0.914747
ENSMUSG00000038668	Lpar1	29	0.91417
ENSMUSG00000091455	Otogl	29	0.90569
ENSMUSG00000022085	Pebp4	29	0.900011
ENSMUSG00000096922	Gm17308	30	1
ENSMUSG00000091227	Gm3755	30	0.985275
ENSMUSG00000030157	Clec2d	30	0.982992
ENSMUSG00000080746	Rpsa-ps12	30	0.978708
ENSMUSG00000097354	2310001H17Rik	30	0.948378
ENSMUSG00000033187	BC016579	30	0.945045
ENSMUSG00000022864	D16Ertd472e	30	0.929638
ENSMUSG00000091305	Gm17100	31	0.997238
ENSMUSG00000025090	Ccdc172	31	0.99702
ENSMUSG00000058488	Kl	31	0.984919
ENSMUSG00000032714	Syde1	31	0.970344
ENSMUSG00000084184	Gm13474	31	0.969619
ENSMUSG00000031074	Fgf3	31	0.959608
ENSMUSG00000033327	Tnxb	31	0.951829
ENSMUSG00000025946	Pth2r	31	0.944379
ENSMUSG00000027719	Adad1	31	0.920056
ENSMUSG00000022758	P2rx6	31	0.919763
ENSMUSG00000019846	Lama4	31	0.909265
ENSMUSG00000073152	Gm10475	31	0.90082
ENSMUSG00000070780	Rbm47	32	0.996334
ENSMUSG00000013353	4931406B18Rik	32	0.993759
ENSMUSG00000089901	Gm8113	32	0.99373
ENSMUSG00000040969	Arhgef38	32	0.989494
ENSMUSG00000002944	Cd36	32	0.985277
ENSMUSG00000040610	Tlx3	32	0.978275
ENSMUSG00000096922	Gm17308	32	0.972177
ENSMUSG00000024900	Cpt1a	32	0.97132
ENSMUSG00000085500	Gm16976	32	0.949442
ENSMUSG00000036192	Rorb	32	0.945725
ENSMUSG00000029304	Spp1	32	0.940887
ENSMUSG00000052374	Actn2	32	0.934416
ENSMUSG00000021478	Drd1	32	0.931374
ENSMUSG00000042961	Egflam	32	0.930853
ENSMUSG00000017688	Hnf4g	32	0.927546
ENSMUSG00000029236	Nmu	32	0.927245
ENSMUSG00000093662	Gm20649	32	0.921494
ENSMUSG00000025789	St8sia2	32	0.92003
ENSMUSG00000036206	Sh3bp4	32	0.917687
ENSMUSG00000044393	Dsg2	32	0.907676
ENSMUSG00000052133	Sema5b	32	0.905402
ENSMUSG00000097644	Gm26862	32	0.901722
ENSMUSG00000025127	Gcgr	33	0.997107
ENSMUSG00000014198	Zfp385c	33	0.991838
ENSMUSG00000022144	Gdnf	33	0.990772
ENSMUSG00000031610	Scrg1	33	0.982054
ENSMUSG00000085428	Gm14344	33	0.98137
ENSMUSG00000004231	Pax2	33	0.974034
ENSMUSG00000041361	Myzap	33	0.973037
ENSMUSG00000102838	Gm37014	33	0.971509
ENSMUSG00000030109	Slc6a12	33	0.970055
ENSMUSG00000002885	Adgre5	33	0.96777
ENSMUSG00000007872	Id3	33	0.967225
ENSMUSG00000024827	Gldc	33	0.960704
ENSMUSG00000089937	Gm7281	33	0.956221
ENSMUSG00000045930	Clec14a	33	0.954954
ENSMUSG00000087216	E130111B04Rik	33	0.954664
ENSMUSG00000039728	Slc6a5	33	0.953093
ENSMUSG00000052334	1700024B05Rik	33	0.950487
ENSMUSG00000020122	Egfr	33	0.946412
ENSMUSG00000063564	Col23a1	33	0.945682
ENSMUSG00000005124	Ccn4	33	0.943544
ENSMUSG00000027347	Rasgrp1	33	0.943418
ENSMUSG00000030041	M1ap	33	0.942299
ENSMUSG00000101505	1700109G14Rik	33	0.938585
ENSMUSG00000026604	Ptpn14	33	0.937532
ENSMUSG00000092369	1700039E22Rik	33	0.937359
ENSMUSG00000023192	Grm2	33	0.931416
ENSMUSG00000020902	Ntn1	33	0.930762
ENSMUSG00000039384	Dusp10	33	0.924147
ENSMUSG00000043747	1520401A03Rik	33	0.923885
ENSMUSG00000032796	Lama1	33	0.92329
ENSMUSG00000029381	Shroom3	33	0.921215
ENSMUSG00000090399	ENSMUSG00000090399	33	0.920082
ENSMUSG00000053965	Pde5a	33	0.918353
ENSMUSG00000032006	Pdgfd	33	0.912708
ENSMUSG00000021614	Vcan	33	0.903454
ENSMUSG00000025216	Lbx1	33	0.903146
ENSMUSG00000009376	Met	34	0.984767
ENSMUSG00000049796	Crh	34	0.984173
ENSMUSG00000054978	Kbtbd13	34	0.98297
ENSMUSG00000056445	Hoxaas2	34	0.982074
ENSMUSG00000087658	Hotairm1	34	0.981335
ENSMUSG00000039321	Uts2r	34	0.977553
ENSMUSG00000101414	Gm29101	34	0.977442
ENSMUSG00000027403	Tgm6	34	0.976873
ENSMUSG00000087234	ENSMUSG00000087234	34	0.973813
ENSMUSG00000086876	Gm12828	34	0.970427
ENSMUSG00000001819	Hoxd13	34	0.966853
ENSMUSG00000069378	Prdm6	34	0.963683
ENSMUSG00000054667	Irs4	34	0.957106
ENSMUSG00000025405	Inhbc	34	0.952535
ENSMUSG00000028369	Svep1	34	0.942868
ENSMUSG00000021509	Slc25a48	34	0.941191
ENSMUSG00000001988	Npas1	34	0.936299
ENSMUSG00000087704	Gm14978	34	0.931421
ENSMUSG00000071112	Spx	34	0.931074
ENSMUSG00000040706	Agmat	34	0.927165
ENSMUSG00000097249	ENSMUSG00000097249	34	0.919295
ENSMUSG00000031727	Pmfbp1	34	0.912765
ENSMUSG00000086391	1700042O10Rik	34	0.908556
ENSMUSG00000073072	ENSMUSG00000073072	35	0.997659
ENSMUSG00000073821	8030451A03Rik	35	0.992736
ENSMUSG00000028364	Tnc	35	0.991905
ENSMUSG00000002228	Ppm1j	35	0.975779
ENSMUSG00000097249	ENSMUSG00000097249	35	0.97336
ENSMUSG00000022018	Rgcc	35	0.967832
ENSMUSG00000042961	Egflam	35	0.956855
ENSMUSG00000031253	Srpx2	35	0.95056
ENSMUSG00000101448	Gm28494	35	0.949355
ENSMUSG00000028339	Col15a1	35	0.938608
ENSMUSG00000039004	Bmp6	35	0.938009
ENSMUSG00000069085	Dytn	35	0.934376
ENSMUSG00000031825	Crispld2	35	0.930748
ENSMUSG00000039115	Itga9	35	0.925288
ENSMUSG00000085222	Gm13974	35	0.920758
ENSMUSG00000090033	Gm16243	35	0.919981
ENSMUSG00000009376	Met	35	0.915127
ENSMUSG00000027859	Ngf	35	0.911398
ENSMUSG00000035109	Shc4	35	0.911351
ENSMUSG00000030905	Crym	36	0.997561
ENSMUSG00000005320	Fgfr4	36	0.988365
ENSMUSG00000041731	Pgm5	36	0.985866
ENSMUSG00000020407	Upp1	36	0.982893
ENSMUSG00000037016	Frem2	36	0.981026
ENSMUSG00000004651	Tyr	36	0.977473
ENSMUSG00000020061	Mybpc1	36	0.976089
ENSMUSG00000064080	Fbln2	36	0.963063
ENSMUSG00000026875	Traf1	36	0.956253
ENSMUSG00000062391	4932435O22Rik	36	0.955259
ENSMUSG00000021803	Cdhr1	36	0.946071
ENSMUSG00000048747	E130114P18Rik	36	0.939857
ENSMUSG00000098522	Mir6412	36	0.932441
ENSMUSG00000023886	Smoc2	36	0.931729
ENSMUSG00000029759	Pon3	36	0.930935
ENSMUSG00000005124	Ccn4	36	0.926936
ENSMUSG00000079022	Col22a1	36	0.906274
ENSMUSG00000026837	Col5a1	36	0.90583
ENSMUSG00000032667	Pon2	36	0.902454
ENSMUSG00000102981	Gm38322	37	1
ENSMUSG00000080746	Rpsa-ps12	37	0.989017
ENSMUSG00000086838	Gm16212	37	0.987486
ENSMUSG00000067653	Ankrd23	37	0.980518
ENSMUSG00000086201	Gm6270	37	0.961879
ENSMUSG00000097178	2310002F09Rik	37	0.953472
ENSMUSG00000100345	Gm29418	37	0.946746
ENSMUSG00000028073	Pear1	37	0.942144
ENSMUSG00000038331	Satb2	37	0.936292
ENSMUSG00000104375	Gm6300	37	0.930897
ENSMUSG00000086541	Has2os	37	0.915244
ENSMUSG00000101445	Gm28932	37	0.912303
ENSMUSG00000032091	Tmprss4	37	0.910929
ENSMUSG00000043969	Emx2	38	0.995908
ENSMUSG00000018654	Ikzf1	38	0.994225
ENSMUSG00000093460	Six3os1	38	0.991041
ENSMUSG00000061048	Cdh3	38	0.983255
ENSMUSG00000087095	Emx2os	38	0.975021
ENSMUSG00000064294	Aox3	38	0.974643
ENSMUSG00000038805	Six3	38	0.971581
ENSMUSG00000036832	Lpar3	38	0.966883
ENSMUSG00000102893	Gm37855	38	0.963804
ENSMUSG00000092196	Gm38505	38	0.96304
ENSMUSG00000029819	Npy	38	0.961651
ENSMUSG00000092355	ENSMUSG00000092355	38	0.961513
ENSMUSG00000084530	ENSMUSG00000084530	38	0.956685
ENSMUSG00000058925	Ccdc192	38	0.955136
ENSMUSG00000015619	Gata3	38	0.946965
ENSMUSG00000028717	Tal1	38	0.93038
ENSMUSG00000069372	Ctxn3	38	0.929766
ENSMUSG00000092242	Gm20515	38	0.920838
ENSMUSG00000000049	Apoh	38	0.90302
ENSMUSG00000047935	Sox1ot	38	0.900516
ENSMUSG00000042045	Sln	39	0.996065
ENSMUSG00000029683	Lmod2	39	0.994154
ENSMUSG00000068428	Gmnc	39	0.993254
ENSMUSG00000067571	Ms4a15	39	0.992315
ENSMUSG00000028008	Asic5	39	0.986448
ENSMUSG00000051354	Samd3	39	0.985865
ENSMUSG00000032446	Eomes	39	0.979601
ENSMUSG00000100534	Gm816	39	0.976921
ENSMUSG00000027157	A26c3	39	0.970182
ENSMUSG00000086550	Pla2g10os	39	0.966898
ENSMUSG00000006445	Epha2	39	0.966487
ENSMUSG00000064052	Gm5089	39	0.966151
ENSMUSG00000018862	Otop3	39	0.965678
ENSMUSG00000050201	Otop2	39	0.962037
ENSMUSG00000088132	ENSMUSG00000088132	39	0.95699
ENSMUSG00000102406	A730094K22Rik	39	0.956771
ENSMUSG00000022678	Nde1	39	0.955759
ENSMUSG00000032572	Col6a4	39	0.951453
ENSMUSG00000035296	Sgcg	39	0.948955
ENSMUSG00000100807	Gm29521	39	0.942619
ENSMUSG00000041046	Ramp3	39	0.940127
ENSMUSG00000038224	Serpinf2	39	0.940126
ENSMUSG00000010461	Eya4	39	0.936755
ENSMUSG00000037679	Inf2	39	0.932162
ENSMUSG00000086254	3100003L05Rik	39	0.931308
ENSMUSG00000021200	Asb2	39	0.930459
ENSMUSG00000070570	Slc17a7	39	0.926602
ENSMUSG00000080848	Gm9385	39	0.92607
ENSMUSG00000100341	Gm29478	39	0.924204
ENSMUSG00000041703	Zic5	39	0.923922
ENSMUSG00000030157	Clec2d	39	0.916365
ENSMUSG00000033590	Myo5c	39	0.911688
ENSMUSG00000073910	Mob3b	39	0.908746
ENSMUSG00000027087	Itgav	39	0.907852
ENSMUSG00000015766	Eps8	39	0.902938
ENSMUSG00000051456	Hspb3	39	0.900256
ENSMUSG00000029338	Antxr2	40	0.997776
ENSMUSG00000087298	Gm9392	40	0.997497
ENSMUSG00000070552	Mrgprx1	40	0.986795
ENSMUSG00000092369	1700039E22Rik	40	0.986314
ENSMUSG00000043013	Onecut1	40	0.976038
ENSMUSG00000004231	Pax2	40	0.970635
ENSMUSG00000039728	Slc6a5	40	0.967994
ENSMUSG00000050761	Gp1bb	40	0.957176
ENSMUSG00000029151	Slc30a3	40	0.955632
ENSMUSG00000102824	Pdcd5-ps	40	0.944466
ENSMUSG00000027270	Lamp5	40	0.930336
ENSMUSG00000104420	E230020A03Rik	40	0.928587
ENSMUSG00000097789	Gm2115	40	0.925895
ENSMUSG00000047996	Prrg1	40	0.924643
ENSMUSG00000032698	Lmo2	40	0.917341
ENSMUSG00000090399	ENSMUSG00000090399	40	0.912729
ENSMUSG00000027800	Tm4sf1	40	0.907608
ENSMUSG00000042655	Shisal2b	41	0.995311
ENSMUSG00000006764	Tph2	41	0.993353
ENSMUSG00000048349	Pou4f1	41	0.988465
ENSMUSG00000034422	Parp14	41	0.984752
ENSMUSG00000030249	Abcc9	41	0.980342
ENSMUSG00000036853	Mcoln3	41	0.979051
ENSMUSG00000020021	Fgd6	41	0.967394
ENSMUSG00000055865	Tafa3	41	0.962652
ENSMUSG00000035258	Abi3bp	41	0.953709
ENSMUSG00000053678	Defb40	41	0.952937
ENSMUSG00000021478	Drd1	41	0.94458
ENSMUSG00000023959	Clic5	41	0.942991
ENSMUSG00000073152	Gm10475	41	0.939944
ENSMUSG00000036904	Fzd8	41	0.937187
ENSMUSG00000056423	Uts2b	41	0.909604
ENSMUSG00000031286	Glt28d2	42	0.992781
ENSMUSG00000101174	Hoxd4	42	0.976238
ENSMUSG00000021600	8030423J24Rik	42	0.97187
ENSMUSG00000080816	Gm12447	42	0.964685
ENSMUSG00000048764	Tmprss11f	42	0.964685
ENSMUSG00000000154	Slc22a18	42	0.946434
ENSMUSG00000102751	Gm37057	42	0.939725
ENSMUSG00000038700	Hoxb5	42	0.938785
ENSMUSG00000093447	Gm5139	42	0.934078
ENSMUSG00000099280	Gm27991	42	0.932965
ENSMUSG00000061462	Obscn	42	0.931841
ENSMUSG00000039865	Slc44a3	42	0.922933
ENSMUSG00000020600	Slc7a15	42	0.921589
ENSMUSG00000097993	Ptprv	42	0.920105
ENSMUSG00000091055	Siglec15	42	0.918282
ENSMUSG00000004864	Mapk13	42	0.915974
ENSMUSG00000102814	Gm37812	42	0.915007
ENSMUSG00000061809	Tbpl2	42	0.913359
ENSMUSG00000027859	Ngf	42	0.911423
ENSMUSG00000077207	Gm25609	42	0.906694
ENSMUSG00000038253	Hoxa5	42	0.906694
ENSMUSG00000060183	Cxcl11	42	0.905754
ENSMUSG00000066361	Serpina3c	42	0.903762
ENSMUSG00000092116	Gm10320	42	0.903762
ENSMUSG00000094585	ENSMUSG00000094585	42	0.903762
ENSMUSG00000089407	Gm24878	42	0.903762
ENSMUSG00000007030	Vwa7	42	0.903563
ENSMUSG00000091204	Gm7271	43	0.975305
ENSMUSG00000020905	Usp43	43	0.974386
ENSMUSG00000082624	Gm12535	43	0.972892
ENSMUSG00000032451	Trim42	43	0.972892
ENSMUSG00000085221	Gm11309	43	0.963645
ENSMUSG00000028024	Enpep	43	0.96022
ENSMUSG00000101612	Gm7933	43	0.9573
ENSMUSG00000083951	Gm13786	43	0.951999
ENSMUSG00000081222	Gm15173	43	0.947225
ENSMUSG00000048776	Pthlh	43	0.943435
ENSMUSG00000102418	Sh2d1b1	43	0.937105
ENSMUSG00000082208	Gm15379	43	0.937105
ENSMUSG00000104103	Gm9517	43	0.935825
ENSMUSG00000044505	Lingo4	43	0.935709
ENSMUSG00000034959	Rubcnl	43	0.931039
ENSMUSG00000051262	Nat8f3	43	0.930767
ENSMUSG00000025774	Crisp4	43	0.930057
ENSMUSG00000102485	Gm37922	43	0.929411
ENSMUSG00000082178	Gm11307	43	0.928497
ENSMUSG00000090194	Gm16161	43	0.928419
ENSMUSG00000041062	Mslnl	43	0.927143
ENSMUSG00000003309	Ap1m2	43	0.926062
ENSMUSG00000096647	Tmem41b-ps	43	0.925496
ENSMUSG00000005220	Corin	43	0.92364
ENSMUSG00000021997	Lrrc63	43	0.92264
ENSMUSG00000038058	Nod1	43	0.919148
ENSMUSG00000094824	ENSMUSG00000094824	43	0.917253
ENSMUSG00000079266	Gm6490	43	0.917253
ENSMUSG00000086044	A330043C09Rik	43	0.91409
ENSMUSG00000073778	Faddos	43	0.912399
ENSMUSG00000038691	Mbd3l1	43	0.912399
ENSMUSG00000023073	Slc10a2	43	0.911328
ENSMUSG00000031981	Capn9	43	0.907088
ENSMUSG00000038651	Sycp2l	43	0.905888
ENSMUSG00000031089	Slc6a14	43	0.903655
ENSMUSG00000074592	ENSMUSG00000074592	44	0.994819
ENSMUSG00000076438	Oxct2b	44	0.984732
ENSMUSG00000000003	Pbsn	44	0.97348
ENSMUSG00000022014	Epsti1	44	0.972321
ENSMUSG00000024761	Gm16437	44	0.966788
ENSMUSG00000023333	Gcm1	44	0.96652
ENSMUSG00000078494	Gm13201	44	0.963361
ENSMUSG00000079460	4933403O08Rik	44	0.952321
ENSMUSG00000019913	Sim1	44	0.951718
ENSMUSG00000086480	Gm15287	44	0.95149
ENSMUSG00000082967	Gm16082	44	0.948549
ENSMUSG00000030966	Trim21	44	0.948296
ENSMUSG00000097056	ENSMUSG00000097056	44	0.947497
ENSMUSG00000056529	Ptafr	44	0.946538
ENSMUSG00000099563	Gm19125	44	0.943396
ENSMUSG00000085116	Gm2735	44	0.937806
ENSMUSG00000083442	ENSMUSG00000083442	44	0.93464
ENSMUSG00000058932	Gm2174	44	0.93464
ENSMUSG00000085794	Vax2os	44	0.932614
ENSMUSG00000056880	Gadl1	44	0.928247
ENSMUSG00000050761	Gp1bb	44	0.925621
ENSMUSG00000090033	Gm16243	44	0.921804
ENSMUSG00000059852	Kcng2	44	0.92051
ENSMUSG00000080849	Gm15702	44	0.919071
ENSMUSG00000073555	Gm4951	44	0.919071
ENSMUSG00000070529	Wfdc10	44	0.919071
ENSMUSG00000085630	Gm11795	44	0.919071
ENSMUSG00000032034	Kcnj5	44	0.917335
ENSMUSG00000081593	Gm11841	44	0.914998
ENSMUSG00000086201	Gm6270	44	0.911703
ENSMUSG00000034871	Fam151a	44	0.910884
ENSMUSG00000032220	Myo1e	44	0.910815
ENSMUSG00000053678	Defb40	44	0.909887
ENSMUSG00000087539	Gm13584	44	0.909283
ENSMUSG00000099021	ENSMUSG00000099021	45	0.984617
ENSMUSG00000082368	Gm11225	45	0.973404
ENSMUSG00000028600	Podn	45	0.968322
ENSMUSG00000022479	Vdr	45	0.965297
ENSMUSG00000092275	Gm20465	45	0.963414
ENSMUSG00000029727	Cyp3a13	45	0.963414
ENSMUSG00000103748	Gm38243	45	0.955128
ENSMUSG00000057719	Sh3rf2	45	0.952081
ENSMUSG00000037552	Plekhg2	45	0.945523
ENSMUSG00000084948	1700061H18Rik	45	0.942745
ENSMUSG00000036687	Tmem184a	45	0.942745
ENSMUSG00000088643	ENSMUSG00000088643	45	0.942745
ENSMUSG00000009246	Trpm5	45	0.927149
ENSMUSG00000001349	Cnn1	45	0.926968
ENSMUSG00000040935	Padi6	45	0.926652
ENSMUSG00000034224	Slc38a8	45	0.925289
ENSMUSG00000039158	Akna	45	0.922649
ENSMUSG00000091227	Gm3755	45	0.92211
ENSMUSG00000100318	Gm18799	45	0.921258
ENSMUSG00000101697	ENSMUSG00000101697	45	0.921258
ENSMUSG00000078202	Nrarp	45	0.920714
ENSMUSG00000096629	Gm3383	45	0.91971
ENSMUSG00000091967	Vmn2r128	45	0.917168
ENSMUSG00000102824	Pdcd5-ps	45	0.916303
ENSMUSG00000024910	Ctsw	45	0.915198
ENSMUSG00000099361	Gm28492	45	0.908738
ENSMUSG00000045629	Sh3tc2	45	0.906994
ENSMUSG00000065874	Gm25683	45	0.905593
ENSMUSG00000098142	Gm7507	45	0.904912
ENSMUSG00000022864	D16Ertd472e	45	0.903786
ENSMUSG00000103207	Gm9874	45	0.901082
ENSMUSG00000033852	Gm28042	46	0.991071
ENSMUSG00000090994	Gm6153	46	0.959741
ENSMUSG00000101922	Gm29345	46	0.959741
ENSMUSG00000079061	Gm11042	46	0.959741
ENSMUSG00000095153	Gm21095	46	0.959741
ENSMUSG00000083410	Gm14300	46	0.942152
ENSMUSG00000101034	ENSMUSG00000101034	46	0.937507
ENSMUSG00000040891	Foxa3	46	0.925541
ENSMUSG00000080687	Mir1197	46	0.918889
ENSMUSG00000024677	Ms4a6b	46	0.918889
ENSMUSG00000096881	Gm20874	46	0.918889
ENSMUSG00000027719	Adad1	46	0.905354
ENSMUSG00000104375	Gm6300	46	0.903757
ENSMUSG00000084674	ENSMUSG00000084674	46	0.902517
ENSMUSG00000092051	Gm17229	46	0.902413
