# Supplementary material
Source: Research Square preprint supplement (doi:10.21203/rs.3.rs-9822028/v1)
Supplement: Supplementary file 2 [file c1645eef42fb27e2e6a9b7d0.xlsx]

## Sheet: Sheet1
gene	Symbol	Cluster	Specificity Score
ENSMUSG00000012520	Phox2b	1	0.996414
ENSMUSG00000024134	Six2	1	0.99285
ENSMUSG00000036907	C1ql2	1	0.992779
ENSMUSG00000017897	Eya2	1	0.992621
ENSMUSG00000027833	Shox2	1	0.989831
ENSMUSG00000025932	Eya1	1	0.986566
ENSMUSG00000051920	Rspo2	1	0.984891
ENSMUSG00000022309	Angpt1	1	0.969323
ENSMUSG00000001988	Npas1	1	0.963647
ENSMUSG00000012350	Ehf	1	0.96311
ENSMUSG00000021010	Npas3	1	0.953237
ENSMUSG00000036528	Ppfibp2	1	0.945631
ENSMUSG00000059991	Nptx2	1	0.938495
ENSMUSG00000000159	Igsf5	1	0.932408
ENSMUSG00000019817	Plagl1	1	0.929525
ENSMUSG00000037610	Kcnmb2	1	0.926752
ENSMUSG00000043441	Gpr149	1	0.925401
ENSMUSG00000097805	Gm17473	1	0.922107
ENSMUSG00000036834	Plch1	1	0.915982
ENSMUSG00000041708	Mpped1	1	0.91006
ENSMUSG00000010476	Ebf3	1	0.9098
ENSMUSG00000028883	Sema3a	1	0.90451
ENSMUSG00000096999	Gm26793	1	0.904363
ENSMUSG00000024784	Gpha2	1	0.904262
ENSMUSG00000031738	Irx6	2	0.995771
ENSMUSG00000050335	Lgals3	2	0.993161
ENSMUSG00000025780	Itih5	2	0.992751
ENSMUSG00000002930	Ppp1r17	2	0.983755
ENSMUSG00000028487	Bnc2	2	0.983115
ENSMUSG00000036192	Rorb	2	0.976405
ENSMUSG00000031283	Chrdl1	2	0.97563
ENSMUSG00000000126	Wnt9a	2	0.972024
ENSMUSG00000050473	Slc35d3	2	0.971717
ENSMUSG00000028780	Sema3c	2	0.970866
ENSMUSG00000049420	Tmem200a	2	0.968891
ENSMUSG00000034324	Tmem132c	2	0.968622
ENSMUSG00000031740	Mmp2	2	0.968167
ENSMUSG00000055368	Slc6a2	2	0.959641
ENSMUSG00000014813	Stc1	2	0.957241
ENSMUSG00000032690	Oas2	2	0.956159
ENSMUSG00000020123	Avpr1a	2	0.950516
ENSMUSG00000058624	Gda	2	0.950031
ENSMUSG00000019899	Lama2	2	0.948821
ENSMUSG00000002944	Cd36	2	0.948762
ENSMUSG00000034687	Fras1	2	0.948626
ENSMUSG00000021919	Chat	2	0.946152
ENSMUSG00000035357	Pdzrn3	2	0.945021
ENSMUSG00000107427	Gm43948	2	0.944694
ENSMUSG00000034997	Htr2a	2	0.943831
ENSMUSG00000017588	Krt27	2	0.943521
ENSMUSG00000050558	Prokr2	2	0.94199
ENSMUSG00000030222	Rerg	2	0.94015
ENSMUSG00000015879	Fam184b	2	0.938417
ENSMUSG00000031548	Sfrp1	2	0.938266
ENSMUSG00000085391	Gm16150	2	0.937698
ENSMUSG00000063838	Cdc42ep5	2	0.934167
ENSMUSG00000004035	Gstm7	2	0.927758
ENSMUSG00000028280	Gabrr1	2	0.921843
ENSMUSG00000042613	Pbxip1	2	0.92053
ENSMUSG00000013936	Myl2	2	0.919376
ENSMUSG00000027907	S100a11	2	0.916264
ENSMUSG00000032698	Lmo2	2	0.915897
ENSMUSG00000029641	Rasl11a	2	0.914992
ENSMUSG00000027801	Tm4sf4	2	0.91483
ENSMUSG00000035274	Tpbg	2	0.912497
ENSMUSG00000024553	Galr1	2	0.910992
ENSMUSG00000032023	Jhy	2	0.91084
ENSMUSG00000000766	Oprm1	2	0.909783
ENSMUSG00000031727	Pmfbp1	2	0.906618
ENSMUSG00000061762	Tac1	2	0.900984
ENSMUSG00000028971	Cort	2	0.900458
ENSMUSG00000038331	Satb2	3	0.995412
ENSMUSG00000017493	Igfbp4	3	0.987643
ENSMUSG00000079017	Ifi27l2a	3	0.985335
ENSMUSG00000055653	Gpc3	3	0.979738
ENSMUSG00000098097	6530403H02Rik	3	0.977268
ENSMUSG00000032271	Nnmt	3	0.975101
ENSMUSG00000107427	Gm43948	3	0.97401
ENSMUSG00000029219	Slc10a4	3	0.973725
ENSMUSG00000022206	Npr3	3	0.973602
ENSMUSG00000103711	Tstd1	3	0.972036
ENSMUSG00000090356	Teddm3	3	0.97099
ENSMUSG00000027907	S100a11	3	0.96507
ENSMUSG00000027913	Crct1	3	0.962721
ENSMUSG00000063838	Cdc42ep5	3	0.962337
ENSMUSG00000019880	Rspo3	3	0.961793
ENSMUSG00000020911	Krt19	3	0.953427
ENSMUSG00000035258	Abi3bp	3	0.953264
ENSMUSG00000028874	Fgr	3	0.952953
ENSMUSG00000061808	Ttr	3	0.94953
ENSMUSG00000100009	Gm7967	3	0.948313
ENSMUSG00000037922	Bank1	3	0.945095
ENSMUSG00000076617	Ighm	3	0.943358
ENSMUSG00000110924	Gm40518	3	0.942589
ENSMUSG00000022053	Ebf2	3	0.941273
ENSMUSG00000022303	Dcstamp	3	0.941141
ENSMUSG00000047161	Chst9	3	0.939812
ENSMUSG00000098098	Bvht	3	0.935303
ENSMUSG00000116831	Gm30505	3	0.933832
ENSMUSG00000032899	Styk1	3	0.933726
ENSMUSG00000090088	Gm15934	3	0.932164
ENSMUSG00000021359	Tfap2a	3	0.932142
ENSMUSG00000041012	Cmtm8	3	0.932085
ENSMUSG00000032122	Slc37a2	3	0.931652
ENSMUSG00000110455	Gm45904	3	0.931619
ENSMUSG00000022371	Col14a1	3	0.928414
ENSMUSG00000097834	Gm26911	3	0.926651
ENSMUSG00000022150	Dab2	3	0.926068
ENSMUSG00000074274	D930028M14Rik	3	0.925479
ENSMUSG00000048126	Col6a3	3	0.922891
ENSMUSG00000030220	Arhgdib	3	0.921418
ENSMUSG00000079852	Klra4	3	0.918145
ENSMUSG00000052560	Cpne8	3	0.917048
ENSMUSG00000049115	Agtr1a	3	0.916025
ENSMUSG00000047867	Gimap6	3	0.914635
ENSMUSG00000036198	Arhgap36	3	0.914212
ENSMUSG00000023046	Igfbp6	3	0.913113
ENSMUSG00000044976	Wdr72	3	0.908833
ENSMUSG00000034786	Gpsm3	3	0.907558
ENSMUSG00000078648	Gm17546	3	0.902847
ENSMUSG00000039098	Gm9767	3	0.902349
ENSMUSG00000042379	Esm1	3	0.9023
ENSMUSG00000085562	2610028E06Rik	3	0.902037
ENSMUSG00000110214	Gm45587	3	0.901621
ENSMUSG00000022382	Wnt7b	3	0.900706
ENSMUSG00000024087	Cyp1b1	4	0.99728
ENSMUSG00000046167	Gldn	4	0.992046
ENSMUSG00000007655	Cav1	4	0.992043
ENSMUSG00000085129	5031425F14Rik	4	0.990128
ENSMUSG00000027400	Pdyn	4	0.985056
ENSMUSG00000000214	Th	4	0.981994
ENSMUSG00000068696	Gpr88	4	0.981106
ENSMUSG00000033502	Cdc14a	4	0.979755
ENSMUSG00000031274	Col4a5	4	0.978892
ENSMUSG00000066975	Cryba4	4	0.977034
ENSMUSG00000038115	Ano2	4	0.975479
ENSMUSG00000027643	Ghrh	4	0.971562
ENSMUSG00000063260	Syt10	4	0.969886
ENSMUSG00000049409	Prokr1	4	0.966051
ENSMUSG00000085925	Rtl1	4	0.964171
ENSMUSG00000026841	Fibcd1	4	0.964105
ENSMUSG00000050534	Htr5b	4	0.964016
ENSMUSG00000042638	Gucy2c	4	0.963611
ENSMUSG00000033060	Lmo7	4	0.961479
ENSMUSG00000041324	Inhba	4	0.957702
ENSMUSG00000026826	Nr4a2	4	0.957495
ENSMUSG00000066197	Gpr139	4	0.955461
ENSMUSG00000054667	Irs4	4	0.955025
ENSMUSG00000020799	Tekt1	4	0.95314
ENSMUSG00000047139	Cd24a	4	0.950968
ENSMUSG00000000247	Lhx2	4	0.950835
ENSMUSG00000028024	Enpep	4	0.948609
ENSMUSG00000058897	Col25a1	4	0.948579
ENSMUSG00000036040	Adamtsl2	4	0.946488
ENSMUSG00000017204	Gsdma	4	0.945684
ENSMUSG00000031273	Col4a6	4	0.944539
ENSMUSG00000085427	6430710C18Rik	4	0.939555
ENSMUSG00000032625	Thsd7a	4	0.939005
ENSMUSG00000023047	Amhr2	4	0.938446
ENSMUSG00000009248	Ascl2	4	0.937505
ENSMUSG00000045232	Rln3	4	0.936301
ENSMUSG00000020913	Krt24	4	0.935381
ENSMUSG00000000058	Cav2	4	0.932497
ENSMUSG00000022864	D16Ertd472e	4	0.931898
ENSMUSG00000060548	Tnfrsf19	4	0.928192
ENSMUSG00000040998	Npnt	4	0.92676
ENSMUSG00000031109	Enox2	4	0.926572
ENSMUSG00000021609	Slc6a3	4	0.92654
ENSMUSG00000036198	Arhgap36	4	0.925986
ENSMUSG00000051456	Hspb3	4	0.917842
ENSMUSG00000048251	Bcl11b	4	0.915974
ENSMUSG00000096883	Shisa8	4	0.912223
ENSMUSG00000029563	Foxp2	4	0.902904
ENSMUSG00000109372	Gm19410	4	0.901515
ENSMUSG00000086308	G630016G05Rik	4	0.901232
ENSMUSG00000042655	Shisal2b	6	0.991216
ENSMUSG00000036169	Sostdc1	6	0.986261
ENSMUSG00000023078	Cxcl13	6	0.984832
ENSMUSG00000054169	Ceacam10	6	0.983968
ENSMUSG00000034422	Parp14	6	0.980679
ENSMUSG00000035258	Abi3bp	6	0.97938
ENSMUSG00000030249	Abcc9	6	0.977542
ENSMUSG00000018845	Unc45b	6	0.977303
ENSMUSG00000016494	Cd34	6	0.969701
ENSMUSG00000032332	Col12a1	6	0.961865
ENSMUSG00000021604	Irx4	6	0.960665
ENSMUSG00000028017	Egf	6	0.957215
ENSMUSG00000041046	Ramp3	6	0.953283
ENSMUSG00000044034	Npb	6	0.951041
ENSMUSG00000086224	2700069I18Rik	6	0.950477
ENSMUSG00000014813	Stc1	6	0.942091
ENSMUSG00000062209	Erbb4	6	0.941759
ENSMUSG00000058665	En1	6	0.941059
ENSMUSG00000025927	Tfap2b	6	0.941053
ENSMUSG00000060594	Layn	6	0.937857
ENSMUSG00000056569	Mpz	6	0.93623
ENSMUSG00000035105	Egln3	6	0.932972
ENSMUSG00000036144	Meox2	6	0.932626
ENSMUSG00000027994	Mcub	6	0.927857
ENSMUSG00000040714	Klc3	6	0.924619
ENSMUSG00000047161	Chst9	6	0.912994
ENSMUSG00000064023	Klk8	6	0.911659
ENSMUSG00000021478	Drd1	6	0.905154
ENSMUSG00000025780	Itih5	6	0.904976
ENSMUSG00000020021	Fgd6	6	0.904114
ENSMUSG00000026832	Cytip	7	0.998492
ENSMUSG00000033774	Npbwr1	7	0.994966
ENSMUSG00000022715	Tmem114	7	0.994824
ENSMUSG00000022514	Il1rap	7	0.986802
ENSMUSG00000041390	Mdfic	7	0.986393
ENSMUSG00000029123	Stk32b	7	0.98318
ENSMUSG00000031212	Pgr15l	7	0.98146
ENSMUSG00000021994	Wnt5a	7	0.981343
ENSMUSG00000041075	Fzd7	7	0.980545
ENSMUSG00000033063	Cntnap3	7	0.979695
ENSMUSG00000022676	Snai2	7	0.978616
ENSMUSG00000049107	Ntf3	7	0.978094
ENSMUSG00000013584	Aldh1a2	7	0.977048
ENSMUSG00000030069	Prok2	7	0.973218
ENSMUSG00000038760	Trhr	7	0.97171
ENSMUSG00000008398	Elk3	7	0.97157
ENSMUSG00000068696	Gpr88	7	0.969185
ENSMUSG00000047259	Mc4r	7	0.967725
ENSMUSG00000050600	Zfp831	7	0.966209
ENSMUSG00000032243	Itga11	7	0.960005
ENSMUSG00000027737	Slc7a11	7	0.958645
ENSMUSG00000028602	Tnfrsf8	7	0.949303
ENSMUSG00000115062	4930544F09Rik	7	0.948943
ENSMUSG00000066842	Hmcn1	7	0.947602
ENSMUSG00000042417	Ccno	7	0.947168
ENSMUSG00000021217	Tshz3	7	0.946028
ENSMUSG00000021676	Iqgap2	7	0.944362
ENSMUSG00000027971	Ndst4	7	0.943796
ENSMUSG00000049090	Zadh2	7	0.942817
ENSMUSG00000002900	Lamb1	7	0.942757
ENSMUSG00000001815	Evx2	7	0.942716
ENSMUSG00000105039	Gm32585	7	0.94164
ENSMUSG00000085139	A730046J19Rik	7	0.936562
ENSMUSG00000071398	2410004P03Rik	7	0.934962
ENSMUSG00000112466	Gm29674	7	0.931118
ENSMUSG00000036136	Fam110c	7	0.928867
ENSMUSG00000046982	Tshz1	7	0.927803
ENSMUSG00000038156	Spon1	7	0.927302
ENSMUSG00000031355	Arhgap6	7	0.926754
ENSMUSG00000029563	Foxp2	7	0.924619
ENSMUSG00000037171	Nodal	7	0.923368
ENSMUSG00000036357	Gpr101	7	0.922373
ENSMUSG00000024713	Pcsk5	7	0.921919
ENSMUSG00000074575	Kcng1	7	0.921455
ENSMUSG00000032532	Cck	7	0.920906
ENSMUSG00000108980	Gm45155	7	0.917649
ENSMUSG00000032033	Barx2	7	0.915487
ENSMUSG00000059898	Dsc3	7	0.915429
ENSMUSG00000068407	Rnase12	7	0.91264
ENSMUSG00000029361	Nos1	7	0.911761
ENSMUSG00000036545	Adamts2	7	0.908167
ENSMUSG00000085950	Gm13589	7	0.907585
ENSMUSG00000047712	Ust	7	0.906369
ENSMUSG00000030075	Cntn3	7	0.904453
ENSMUSG00000001819	Hoxd13	7	0.904094
ENSMUSG00000034308	Sdr42e1	7	0.903663
ENSMUSG00000095620	Csta2	7	0.903241
ENSMUSG00000052062	Pard3b	7	0.901912
ENSMUSG00000024517	Grp	7	0.901708
ENSMUSG00000026831	1700007K13Rik	7	0.901445
ENSMUSG00000031130	Brs3	8	0.998286
ENSMUSG00000031461	Myom2	8	0.992455
ENSMUSG00000026147	Col9a1	8	0.991949
ENSMUSG00000044172	Ptx4	8	0.988981
ENSMUSG00000022246	Rai14	8	0.987795
ENSMUSG00000071317	Bves	8	0.986253
ENSMUSG00000030043	Tacr1	8	0.984424
ENSMUSG00000063681	Crb1	8	0.983946
ENSMUSG00000097652	Mhrt	8	0.983572
ENSMUSG00000051029	Serpinb1b	8	0.980855
ENSMUSG00000074345	Tnfaip8l3	8	0.98016
ENSMUSG00000041975	Mettl8	8	0.978448
ENSMUSG00000027339	Rassf2	8	0.978231
ENSMUSG00000023387	Kcnk16	8	0.977819
ENSMUSG00000022112	Gpc5	8	0.976793
ENSMUSG00000074491	Clec4g	8	0.976488
ENSMUSG00000108713	Gm33027	8	0.973051
ENSMUSG00000018893	Mb	8	0.970842
ENSMUSG00000032667	Pon2	8	0.970296
ENSMUSG00000029759	Pon3	8	0.970231
ENSMUSG00000052551	Adarb2	8	0.969662
ENSMUSG00000108084	Gm7932	8	0.969159
ENSMUSG00000031966	Glb1l3	8	0.96886
ENSMUSG00000035557	Krt17	8	0.967804
ENSMUSG00000042607	Asb4	8	0.967351
ENSMUSG00000040605	Bace2	8	0.962369
ENSMUSG00000004341	Gpx6	8	0.960733
ENSMUSG00000026193	Fn1	8	0.955993
ENSMUSG00000005268	Prlr	8	0.947434
ENSMUSG00000056306	Sertm1	8	0.946174
ENSMUSG00000026655	Fam107b	8	0.941465
ENSMUSG00000096775	Gm5796	8	0.94026
ENSMUSG00000079391	Gm2974	8	0.940109
ENSMUSG00000014030	Pax5	8	0.940048
ENSMUSG00000079388	2610042L04Rik	8	0.937688
ENSMUSG00000097768	2310043M15Rik	8	0.93479
ENSMUSG00000064065	Ipcef1	8	0.934494
ENSMUSG00000050830	Vwc2	8	0.934035
ENSMUSG00000045573	Penk	8	0.93358
ENSMUSG00000113553	Gm40932	8	0.930432
ENSMUSG00000032495	Lrrc2	8	0.930157
ENSMUSG00000022231	Sema5a	8	0.929402
ENSMUSG00000026117	Zap70	8	0.929332
ENSMUSG00000042514	Klhl14	8	0.929052
ENSMUSG00000041708	Mpped1	8	0.925971
ENSMUSG00000055471	Alk	8	0.925491
ENSMUSG00000038370	Pcp4l1	8	0.923286
ENSMUSG00000026156	B3gat2	8	0.920745
ENSMUSG00000068079	Tcf15	8	0.919812
ENSMUSG00000036437	Npy1r	8	0.918021
ENSMUSG00000043531	Sorcs1	8	0.917164
ENSMUSG00000055653	Gpc3	8	0.913783
ENSMUSG00000053963	Stum	8	0.912998
ENSMUSG00000055202	Zfp811	8	0.912015
ENSMUSG00000086126	Evx1os	8	0.910994
ENSMUSG00000003418	St8sia6	8	0.910304
ENSMUSG00000037664	Cdkn1c	8	0.910122
ENSMUSG00000001260	Gabrg1	8	0.908799
ENSMUSG00000086587	Gm11837	8	0.908294
ENSMUSG00000085289	Gm15337	8	0.90816
ENSMUSG00000098075	Gm26994	8	0.907877
ENSMUSG00000005503	Evx1	8	0.907479
ENSMUSG00000026196	Bard1	8	0.904428
ENSMUSG00000027996	Sfrp2	8	0.901585
ENSMUSG00000069793	Slfn9	9	0.996475
ENSMUSG00000070780	Rbm47	9	0.994323
ENSMUSG00000095384	1700001F09Rik	9	0.990717
ENSMUSG00000050957	Insl6	9	0.99059
ENSMUSG00000015533	Itga2	9	0.987384
ENSMUSG00000031688	Pou4f2	9	0.983084
ENSMUSG00000064201	Krt2	9	0.981132
ENSMUSG00000101308	Gm28989	9	0.979623
ENSMUSG00000046814	Gchfr	9	0.979571
ENSMUSG00000067604	Nms	9	0.979216
ENSMUSG00000002944	Cd36	9	0.978095
ENSMUSG00000100860	2010009K17Rik	9	0.975366
ENSMUSG00000079042	Apela	9	0.975271
ENSMUSG00000044317	Gpr4	9	0.973003
ENSMUSG00000092142	Gm6482	9	0.972053
ENSMUSG00000046207	Pik3r6	9	0.969057
ENSMUSG00000072605	Gm10376	9	0.965768
ENSMUSG00000040706	Agmat	9	0.962563
ENSMUSG00000021478	Drd1	9	0.960618
ENSMUSG00000025094	Slc18a2	9	0.960302
ENSMUSG00000106139	Gm30648	9	0.959332
ENSMUSG00000045328	Cenpe	9	0.95888
ENSMUSG00000029675	Eln	9	0.958299
ENSMUSG00000001103	Sebox	9	0.954513
ENSMUSG00000021732	Fgf10	9	0.953866
ENSMUSG00000091131	Gm7945	9	0.953046
ENSMUSG00000029304	Spp1	9	0.952539
ENSMUSG00000028036	Ptgfr	9	0.95179
ENSMUSG00000025776	Crispld1	9	0.947904
ENSMUSG00000026610	Esrrg	9	0.946729
ENSMUSG00000051354	Samd3	9	0.946062
ENSMUSG00000011263	Exoc3l2	9	0.945629
ENSMUSG00000031586	Rbpms	9	0.94312
ENSMUSG00000027318	Adam33	9	0.942086
ENSMUSG00000026514	Cnih3	9	0.941067
ENSMUSG00000017830	Dhx58	9	0.940803
ENSMUSG00000040969	Arhgef38	9	0.938114
ENSMUSG00000054061	Gm9934	9	0.936595
ENSMUSG00000057457	Phex	9	0.934356
ENSMUSG00000087501	Gm12116	9	0.933027
ENSMUSG00000108532	Gm32647	9	0.932481
ENSMUSG00000050808	Muc15	9	0.931873
ENSMUSG00000037362	Ccn3	9	0.931288
ENSMUSG00000029236	Nmu	9	0.930573
ENSMUSG00000059857	Ntng1	9	0.929108
ENSMUSG00000049916	2610318N02Rik	9	0.927249
ENSMUSG00000033420	Antxr1	9	0.927176
ENSMUSG00000029032	Arhgef16	9	0.926736
ENSMUSG00000030109	Slc6a12	9	0.925988
ENSMUSG00000018845	Unc45b	9	0.921429
ENSMUSG00000075324	Fign	9	0.920626
ENSMUSG00000027577	Chrna4	9	0.920201
ENSMUSG00000045333	Zfp423	9	0.920073
ENSMUSG00000057777	Mab21l2	9	0.919984
ENSMUSG00000051515	Fam181b	9	0.919798
ENSMUSG00000090125	Pou3f1	9	0.919276
ENSMUSG00000028289	Epha7	9	0.918068
ENSMUSG00000036192	Rorb	9	0.916833
ENSMUSG00000023800	Tiam2	9	0.915478
ENSMUSG00000026686	Lmx1a	9	0.911857
ENSMUSG00000009734	Pou6f2	9	0.911094
ENSMUSG00000040610	Tlx3	9	0.910251
ENSMUSG00000052951	C130021I20Rik	9	0.903403
ENSMUSG00000038765	Lmx1b	9	0.903185
ENSMUSG00000004885	Crabp2	9	0.902724
ENSMUSG00000042622	Maff	9	0.901895
ENSMUSG00000025255	Zfhx4	9	0.900797
ENSMUSG00000041272	Tox	9	0.900525
ENSMUSG00000046719	Nxph3	9	0.900317
ENSMUSG00000028003	Lrat	10	0.99689
ENSMUSG00000021680	Crhbp	10	0.994326
ENSMUSG00000020007	Il20ra	10	0.991412
ENSMUSG00000030669	Calca	10	0.987742
ENSMUSG00000030666	Calcb	10	0.987392
ENSMUSG00000050473	Slc35d3	10	0.986369
ENSMUSG00000085562	2610028E06Rik	10	0.98622
ENSMUSG00000051590	Map3k19	10	0.985097
ENSMUSG00000028780	Sema3c	10	0.983043
ENSMUSG00000058624	Gda	10	0.981945
ENSMUSG00000055368	Slc6a2	10	0.978896
ENSMUSG00000025780	Itih5	10	0.978639
ENSMUSG00000020357	Flt4	10	0.973429
ENSMUSG00000050558	Prokr2	10	0.972597
ENSMUSG00000031548	Sfrp1	10	0.971884
ENSMUSG00000019890	Nts	10	0.970877
ENSMUSG00000036853	Mcoln3	10	0.969063
ENSMUSG00000090874	Olfr733	10	0.967987
ENSMUSG00000021919	Chat	10	0.9655
ENSMUSG00000039358	Drd5	10	0.96479
ENSMUSG00000032440	Tgfbr2	10	0.962349
ENSMUSG00000055409	Nell1	10	0.962309
ENSMUSG00000033308	Dpyd	10	0.961637
ENSMUSG00000031738	Irx6	10	0.960956
ENSMUSG00000036790	Slitrk2	10	0.959916
ENSMUSG00000113121	Gm35161	10	0.959473
ENSMUSG00000049796	Crh	10	0.958453
ENSMUSG00000026686	Lmx1a	10	0.956886
ENSMUSG00000000766	Oprm1	10	0.956554
ENSMUSG00000075012	Fjx1	10	0.956455
ENSMUSG00000035274	Tpbg	10	0.952643
ENSMUSG00000097794	Gm2990	10	0.952546
ENSMUSG00000114845	Gm47511	10	0.950437
ENSMUSG00000023945	Slc5a7	10	0.950312
ENSMUSG00000100241	Slc18a3	10	0.950184
ENSMUSG00000023995	Tspo2	10	0.9489
ENSMUSG00000022206	Npr3	10	0.948016
ENSMUSG00000029381	Shroom3	10	0.947675
ENSMUSG00000048482	Bdnf	10	0.945564
ENSMUSG00000099938	C030007H22Rik	10	0.944468
ENSMUSG00000032377	Plscr4	10	0.943095
ENSMUSG00000055026	Gabrg3	10	0.943084
ENSMUSG00000009734	Pou6f2	10	0.940188
ENSMUSG00000028487	Bnc2	10	0.938822
ENSMUSG00000027907	S100a11	10	0.937819
ENSMUSG00000031737	Irx5	10	0.935924
ENSMUSG00000039997	Ifi203	10	0.93569
ENSMUSG00000035305	Ror1	10	0.931611
ENSMUSG00000042473	Tbc1d8b	10	0.931094
ENSMUSG00000028280	Gabrr1	10	0.930582
ENSMUSG00000036264	Fstl4	10	0.929242
ENSMUSG00000045991	Onecut2	10	0.927367
ENSMUSG00000021675	F2rl2	10	0.927275
ENSMUSG00000024064	Galnt14	10	0.923259
ENSMUSG00000017057	Il13ra1	10	0.923213
ENSMUSG00000036306	Lzts1	10	0.922113
ENSMUSG00000000861	Bcl11a	10	0.919167
ENSMUSG00000021803	Cdhr1	10	0.918165
ENSMUSG00000036225	Kctd1	10	0.918022
ENSMUSG00000008305	Tle1	10	0.917437
ENSMUSG00000024256	Adcyap1	10	0.916979
ENSMUSG00000087322	Gm16075	10	0.912906
ENSMUSG00000019256	Ahr	10	0.912031
ENSMUSG00000068762	Gstm6	10	0.909536
ENSMUSG00000070866	Zfp804a	10	0.906303
ENSMUSG00000025927	Tfap2b	10	0.904375
ENSMUSG00000022894	Adamts5	10	0.901109
ENSMUSG00000107279	Gm43450	11	0.997935
ENSMUSG00000013584	Aldh1a2	11	0.997813
ENSMUSG00000023964	Calcr	11	0.992279
ENSMUSG00000096215	Smim22	11	0.991679
ENSMUSG00000023829	Slc22a1	11	0.991048
ENSMUSG00000005087	Cd44	11	0.988304
ENSMUSG00000030069	Prok2	11	0.988094
ENSMUSG00000074939	Chrm5	11	0.985624
ENSMUSG00000032274	Cyp19a1	11	0.985061
ENSMUSG00000039070	Cpa4	11	0.984008
ENSMUSG00000036357	Gpr101	11	0.983661
ENSMUSG00000032034	Kcnj5	11	0.979847
ENSMUSG00000038760	Trhr	11	0.974428
ENSMUSG00000113252	Gm33489	11	0.971438
ENSMUSG00000046922	Gpr6	11	0.971374
ENSMUSG00000010136	Pifo	11	0.970552
ENSMUSG00000022860	Chodl	11	0.970332
ENSMUSG00000029123	Stk32b	11	0.969385
ENSMUSG00000076928	Trac	11	0.968593
ENSMUSG00000021363	Mak	11	0.967537
ENSMUSG00000051397	Tacstd2	11	0.966495
ENSMUSG00000113314	Gm2721	11	0.966388
ENSMUSG00000048217	Nags	11	0.963948
ENSMUSG00000026676	Ccdc3	11	0.961335
ENSMUSG00000023043	Krt18	11	0.960685
ENSMUSG00000085139	A730046J19Rik	11	0.955301
ENSMUSG00000052135	Foxo6	11	0.9547
ENSMUSG00000037171	Nodal	11	0.954632
ENSMUSG00000021779	Thrb	11	0.954575
ENSMUSG00000085837	Kcnmb4os2	11	0.954121
ENSMUSG00000074934	Grem1	11	0.954057
ENSMUSG00000108025	Gm36503	11	0.95402
ENSMUSG00000021217	Tshz3	11	0.953779
ENSMUSG00000025810	Nrp1	11	0.95372
ENSMUSG00000054944	5330416C01Rik	11	0.953347
ENSMUSG00000028364	Tnc	11	0.952876
ENSMUSG00000033053	1700028P14Rik	11	0.952705
ENSMUSG00000027400	Pdyn	11	0.951429
ENSMUSG00000034467	Dynlrb2	11	0.950612
ENSMUSG00000048038	Ccdc187	11	0.95051
ENSMUSG00000054934	Kcnmb4	11	0.950094
ENSMUSG00000033774	Npbwr1	11	0.949898
ENSMUSG00000074678	Defb25	11	0.949566
ENSMUSG00000057454	Lypd3	11	0.949408
ENSMUSG00000024517	Grp	11	0.945633
ENSMUSG00000038537	Mc3r	11	0.94535
ENSMUSG00000024713	Pcsk5	11	0.943863
ENSMUSG00000039620	Trmt9b	11	0.941507
ENSMUSG00000020143	Dock2	11	0.941088
ENSMUSG00000108470	Gm4598	11	0.938821
ENSMUSG00000031561	Tenm3	11	0.938803
ENSMUSG00000106445	Gm21190	11	0.936841
ENSMUSG00000046159	Chrm3	11	0.934679
ENSMUSG00000045532	C1ql1	11	0.932436
ENSMUSG00000053783	1700016K19Rik	11	0.931485
ENSMUSG00000042607	Asb4	11	0.930687
ENSMUSG00000026831	1700007K13Rik	11	0.926956
ENSMUSG00000085427	6430710C18Rik	11	0.926828
ENSMUSG00000097558	Gm26902	11	0.92556
ENSMUSG00000032081	Apoc3	11	0.92453
ENSMUSG00000041324	Inhba	11	0.924238
ENSMUSG00000031927	1700012B09Rik	11	0.92367
ENSMUSG00000038668	Lpar1	11	0.92317
ENSMUSG00000072941	Sod3	11	0.922705
ENSMUSG00000026826	Nr4a2	11	0.922285
ENSMUSG00000060969	Irx1	11	0.921953
ENSMUSG00000029563	Foxp2	11	0.920868
ENSMUSG00000067594	Krt77	11	0.918301
ENSMUSG00000058925	Ccdc192	11	0.914654
ENSMUSG00000073102	Drc1	11	0.912864
ENSMUSG00000053368	Rxfp2	11	0.91171
ENSMUSG00000016206	H2-M3	11	0.910937
ENSMUSG00000059213	Ddn	11	0.910882
ENSMUSG00000048721	Fndc9	11	0.91069
ENSMUSG00000024011	Pi16	11	0.909967
ENSMUSG00000032530	Lyzl4	11	0.908871
ENSMUSG00000079502	Cfap77	11	0.907584
ENSMUSG00000035910	Dcdc2a	11	0.906936
ENSMUSG00000034413	Neurl1b	11	0.906749
ENSMUSG00000051950	B3glct	11	0.906257
ENSMUSG00000066952	Myo1h	11	0.904516
ENSMUSG00000058897	Col25a1	11	0.903212
ENSMUSG00000056215	Lrguk	11	0.903207
ENSMUSG00000054556	Gm4876	11	0.903067
ENSMUSG00000001604	Tcea3	11	0.902759
ENSMUSG00000098659	1110015O18Rik	11	0.901754
ENSMUSG00000087249	Gm16062	11	0.901334
ENSMUSG00000041075	Fzd7	11	0.900948
ENSMUSG00000034384	Barhl2	12	0.999124
ENSMUSG00000029378	Areg	12	0.996189
ENSMUSG00000097018	Gm26872	12	0.992804
ENSMUSG00000040998	Npnt	12	0.983317
ENSMUSG00000024154	Gtf2a1l	12	0.983176
ENSMUSG00000024907	Gal	12	0.980454
ENSMUSG00000085129	5031425F14Rik	12	0.979639
ENSMUSG00000073804	Nps	12	0.976534
ENSMUSG00000029101	Rgs12	12	0.974761
ENSMUSG00000085338	2410004I01Rik	12	0.974308
ENSMUSG00000055775	Myh8	12	0.971123
ENSMUSG00000085041	BB031773	12	0.968825
ENSMUSG00000031616	Ednra	12	0.967311
ENSMUSG00000040533	Matn1	12	0.967271
ENSMUSG00000024053	Emilin2	12	0.967107
ENSMUSG00000016487	Ppfibp1	12	0.966639
ENSMUSG00000078253	Krtap16-1	12	0.965528
ENSMUSG00000058400	Qrfpr	12	0.959583
ENSMUSG00000063600	Egfem1	12	0.952717
ENSMUSG00000026726	Cubn	12	0.944819
ENSMUSG00000030838	Ush1c	12	0.942164
ENSMUSG00000109097	Gm29683	12	0.940894
ENSMUSG00000108025	Gm36503	12	0.932598
ENSMUSG00000001076	C1ql4	12	0.926307
ENSMUSG00000053004	Hrh1	12	0.924732
ENSMUSG00000038009	Dnajc22	12	0.924286
ENSMUSG00000049409	Prokr1	12	0.920849
ENSMUSG00000024990	Rbp4	12	0.918799
ENSMUSG00000019990	Pde7b	12	0.917988
ENSMUSG00000030866	Ern2	12	0.912622
ENSMUSG00000042064	Myo3b	12	0.912254
ENSMUSG00000062372	Otof	12	0.911167
ENSMUSG00000039116	Adgrg6	12	0.908286
ENSMUSG00000026475	Rgs16	12	0.907881
ENSMUSG00000031932	Gpr83	12	0.904882
ENSMUSG00000092094	Zfp804b	12	0.904683
ENSMUSG00000074517	Gm10710	12	0.902445
ENSMUSG00000021685	Otp	13	0.996385
ENSMUSG00000015619	Gata3	13	0.993369
ENSMUSG00000114807	Gm32090	13	0.99328
ENSMUSG00000026976	Pax8	13	0.990367
ENSMUSG00000028736	Pax7	13	0.988494
ENSMUSG00000005892	Trh	13	0.985612
ENSMUSG00000028717	Tal1	13	0.985011
ENSMUSG00000067724	Gbx1	13	0.981536
ENSMUSG00000028707	Dmbx1	13	0.981493
ENSMUSG00000053747	Sox14	13	0.980702
ENSMUSG00000068859	Sp9	13	0.971625
ENSMUSG00000018698	Lhx1	13	0.971418
ENSMUSG00000038805	Six3	13	0.968207
ENSMUSG00000029595	Lhx5	13	0.966717
ENSMUSG00000035831	Krt25	13	0.965299
ENSMUSG00000098649	Gm27199	13	0.965134
ENSMUSG00000087211	Lhx1os	13	0.961933
ENSMUSG00000005917	Otx1	13	0.956045
ENSMUSG00000047586	Nccrp1	13	0.953348
ENSMUSG00000075570	Krt26	13	0.952383
ENSMUSG00000029151	Slc30a3	13	0.951999
ENSMUSG00000044017	Adgrd1	13	0.947406
ENSMUSG00000026787	Gad2	13	0.942626
ENSMUSG00000018654	Ikzf1	13	0.940561
ENSMUSG00000099957	2610027F03Rik	13	0.937988
ENSMUSG00000045179	Sox3	13	0.937588
ENSMUSG00000037771	Slc32a1	13	0.93678
ENSMUSG00000039728	Slc6a5	13	0.936043
ENSMUSG00000070880	Gad1	13	0.935043
ENSMUSG00000004231	Pax2	13	0.932239
ENSMUSG00000020913	Krt24	13	0.931196
ENSMUSG00000045731	Pnoc	13	0.930512
ENSMUSG00000015053	Gata2	13	0.930094
ENSMUSG00000004347	Pde1c	13	0.927092
ENSMUSG00000029594	Rbm19	13	0.921388
ENSMUSG00000038523	1700003F12Rik	13	0.915753
ENSMUSG00000020592	Sdc1	13	0.908782
ENSMUSG00000109688	Gm34597	13	0.905111
ENSMUSG00000061524	Zic2	13	0.9046
ENSMUSG00000020902	Ntn1	13	0.903638
ENSMUSG00000026241	Nppc	13	0.901835
ENSMUSG00000114774	Gm35281	14	0.997904
ENSMUSG00000037161	Mgarp	14	0.995349
ENSMUSG00000034009	Rxfp1	14	0.994546
ENSMUSG00000013611	Snx31	14	0.992003
ENSMUSG00000066842	Hmcn1	14	0.989254
ENSMUSG00000021835	Bmp4	14	0.987252
ENSMUSG00000063661	Krt73	14	0.981897
ENSMUSG00000109643	Gm31545	14	0.980154
ENSMUSG00000034185	6430628N08Rik	14	0.977486
ENSMUSG00000028864	Hgf	14	0.976575
ENSMUSG00000086170	Gm12144	14	0.972134
ENSMUSG00000056888	Glipr1	14	0.971456
ENSMUSG00000018581	Dnah11	14	0.966514
ENSMUSG00000039529	Atp8b1	14	0.964765
ENSMUSG00000112663	C630031E19Rik	14	0.962841
ENSMUSG00000078958	Atp6ap1l	14	0.962712
ENSMUSG00000049744	Arhgap15	14	0.957329
ENSMUSG00000032105	Pdzd3	14	0.95592
ENSMUSG00000021609	Slc6a3	14	0.953091
ENSMUSG00000059852	Kcng2	14	0.951134
ENSMUSG00000049630	C1ql3	14	0.946496
ENSMUSG00000022324	Matn2	14	0.945718
ENSMUSG00000042514	Klhl14	14	0.944443
ENSMUSG00000074006	Omp	14	0.943745
ENSMUSG00000026872	Zeb2	14	0.943438
ENSMUSG00000057722	Lepr	14	0.942364
ENSMUSG00000040086	Tnni3k	14	0.941674
ENSMUSG00000045875	Adra1a	14	0.940925
ENSMUSG00000043441	Gpr149	14	0.937425
ENSMUSG00000016028	Celsr1	14	0.934626
ENSMUSG00000043168	4930426D05Rik	14	0.932542
ENSMUSG00000023964	Calcr	14	0.929546
ENSMUSG00000109028	Gm35842	14	0.922549
ENSMUSG00000014030	Pax5	14	0.921366
ENSMUSG00000058159	T2	14	0.91794
ENSMUSG00000032773	Chrm1	14	0.917851
ENSMUSG00000046561	Arsj	14	0.917586
ENSMUSG00000032502	Stac	14	0.917154
ENSMUSG00000021464	Ror2	14	0.914038
ENSMUSG00000072949	Acot1	14	0.913498
ENSMUSG00000071984	Fndc1	14	0.910117
ENSMUSG00000048776	Pthlh	14	0.9085
ENSMUSG00000020798	Spns3	14	0.907825
ENSMUSG00000000247	Lhx2	14	0.90068
ENSMUSG00000019935	Slc17a8	15	0.991576
ENSMUSG00000025723	Nmb	15	0.99057
ENSMUSG00000097354	2310001H17Rik	15	0.989907
ENSMUSG00000030218	Mgp	15	0.987286
ENSMUSG00000039899	Fgl2	15	0.986945
ENSMUSG00000047139	Cd24a	15	0.985299
ENSMUSG00000051136	Ghsr	15	0.983198
ENSMUSG00000068122	Agtr2	15	0.972342
ENSMUSG00000001076	C1ql4	15	0.972333
ENSMUSG00000040016	Ptger3	15	0.971623
ENSMUSG00000043549	Fam90a1b	15	0.966186
ENSMUSG00000056870	Gulp1	15	0.965266
ENSMUSG00000112544	Gm48089	15	0.964608
ENSMUSG00000033502	Cdc14a	15	0.964171
ENSMUSG00000110468	Gm39185	15	0.963949
ENSMUSG00000056854	Pou3f4	15	0.963191
ENSMUSG00000005503	Evx1	15	0.958485
ENSMUSG00000043557	Mdga1	15	0.956108
ENSMUSG00000046167	Gldn	15	0.954113
ENSMUSG00000026826	Nr4a2	15	0.953682
ENSMUSG00000022112	Gpc5	15	0.949949
ENSMUSG00000042225	Ammecr1	15	0.94824
ENSMUSG00000026841	Fibcd1	15	0.946825
ENSMUSG00000071341	Egr4	15	0.945411
ENSMUSG00000068407	Rnase12	15	0.942838
ENSMUSG00000017491	Rarb	15	0.936963
ENSMUSG00000031841	Cdh13	15	0.935998
ENSMUSG00000020847	Rph3al	15	0.933472
ENSMUSG00000013846	St3gal1	15	0.927381
ENSMUSG00000042064	Myo3b	15	0.925615
ENSMUSG00000086126	Evx1os	15	0.924068
ENSMUSG00000036800	Fam135b	15	0.922196
ENSMUSG00000032311	Nrg4	15	0.921381
ENSMUSG00000097289		15	0.913211
ENSMUSG00000023886	Smoc2	15	0.91133
ENSMUSG00000033060	Lmo7	15	0.910702
ENSMUSG00000023829	Slc22a1	15	0.910243
ENSMUSG00000109088	Gm44593	15	0.908274
ENSMUSG00000024990	Rbp4	15	0.907256
ENSMUSG00000051726	Kcnf1	15	0.903388
ENSMUSG00000027400	Pdyn	15	0.902321
ENSMUSG00000115858	4930588J15Rik	15	0.900937
ENSMUSG00000051378	Kif18b	16	0.995394
ENSMUSG00000058400	Qrfpr	16	0.995327
ENSMUSG00000041534	Rbp3	16	0.98842
ENSMUSG00000045775	Slc16a5	16	0.987149
ENSMUSG00000016028	Celsr1	16	0.983376
ENSMUSG00000071398	2410004P03Rik	16	0.983131
ENSMUSG00000034382	AI661453	16	0.983095
ENSMUSG00000053368	Rxfp2	16	0.982841
ENSMUSG00000030838	Ush1c	16	0.982606
ENSMUSG00000033355	Rtp4	16	0.980101
ENSMUSG00000030217	Art4	16	0.979156
ENSMUSG00000109598	Gm36356	16	0.977088
ENSMUSG00000070817	Vmn1r85	16	0.97702
ENSMUSG00000022483	Col2a1	16	0.976372
ENSMUSG00000001473	Tubb6	16	0.973715
ENSMUSG00000079070	Gm3985	16	0.972954
ENSMUSG00000032852	Rspo4	16	0.971295
ENSMUSG00000115936	4833415N18Rik	16	0.97129
ENSMUSG00000032243	Itga11	16	0.971286
ENSMUSG00000001604	Tcea3	16	0.970187
ENSMUSG00000024885	Aldh3b1	16	0.969417
ENSMUSG00000001348	Acp5	16	0.966923
ENSMUSG00000032511	Scn5a	16	0.966649
ENSMUSG00000044167	Foxo1	16	0.96596
ENSMUSG00000027643	Ghrh	16	0.9654
ENSMUSG00000030789	Itgax	16	0.964256
ENSMUSG00000068614	Actc1	16	0.963401
ENSMUSG00000021879	Dnah12	16	0.959177
ENSMUSG00000031927	1700012B09Rik	16	0.957926
ENSMUSG00000028602	Tnfrsf8	16	0.957362
ENSMUSG00000075402	Krt76	16	0.955766
ENSMUSG00000086298	Gm11716	16	0.955361
ENSMUSG00000036523	Greb1	16	0.955094
ENSMUSG00000022262	Dnah5	16	0.953687
ENSMUSG00000029185	Fam114a1	16	0.951954
ENSMUSG00000043850	Clrn1	16	0.950601
ENSMUSG00000033082	Clec1a	16	0.949997
ENSMUSG00000105039	Gm32585	16	0.949651
ENSMUSG00000028341	Nr4a3	16	0.948394
ENSMUSG00000075296	Aldh3b2	16	0.948387
ENSMUSG00000045532	C1ql1	16	0.9468
ENSMUSG00000050824	Sstr5	16	0.944152
ENSMUSG00000025789	St8sia2	16	0.940864
ENSMUSG00000053469	Tg	16	0.940227
ENSMUSG00000095620	Csta2	16	0.939739
ENSMUSG00000049107	Ntf3	16	0.939729
ENSMUSG00000016763	Scube1	16	0.937251
ENSMUSG00000001435	Col18a1	16	0.930128
ENSMUSG00000091705	H2-Q2	16	0.927508
ENSMUSG00000021414	Fam217a	16	0.926936
ENSMUSG00000075324	Fign	16	0.925364
ENSMUSG00000032105	Pdzd3	16	0.923889
ENSMUSG00000031789	Cngb1	16	0.923863
ENSMUSG00000073804	Nps	16	0.920363
ENSMUSG00000054986	Sec14l3	16	0.918662
ENSMUSG00000022237	Ankrd33b	16	0.916595
ENSMUSG00000054555	Adam12	16	0.916006
ENSMUSG00000044646	Zbtb7c	16	0.912337
ENSMUSG00000067698	Gm10220	16	0.911819
ENSMUSG00000056888	Glipr1	16	0.910139
ENSMUSG00000022435	Upk3a	16	0.909972
ENSMUSG00000032033	Barx2	16	0.908774
ENSMUSG00000033383	Rtp1	16	0.908701
ENSMUSG00000002930	Ppp1r17	16	0.908374
ENSMUSG00000000214	Th	16	0.90547
ENSMUSG00000029379	Cxcl3	16	0.904716
ENSMUSG00000055632	Hmcn2	16	0.903785
ENSMUSG00000029442	Wdr66	16	0.903667
ENSMUSG00000056215	Lrguk	16	0.903518
ENSMUSG00000010136	Pifo	16	0.902414
ENSMUSG00000028370	Pappa	16	0.901835
ENSMUSG00000032265	Tent5a	16	0.901021
ENSMUSG00000028753	Vwa5b1	16	0.900736
ENSMUSG00000031340	Gabre	16	0.900548
ENSMUSG00000022479	Vdr	17	0.994907
ENSMUSG00000046790	Olfr1341	17	0.990285
ENSMUSG00000005320	Fgfr4	17	0.989729
ENSMUSG00000023959	Clic5	17	0.987424
ENSMUSG00000021367	Edn1	17	0.986867
ENSMUSG00000066750	Olfr876	17	0.986662
ENSMUSG00000021765	Fst	17	0.986431
ENSMUSG00000001023	S100a5	17	0.985817
ENSMUSG00000070821	Olfr1340	17	0.982932
ENSMUSG00000040605	Bace2	17	0.981909
ENSMUSG00000005864	Cnga2	17	0.980266
ENSMUSG00000034224	Slc38a8	17	0.979382
ENSMUSG00000027568	Ntsr1	17	0.978413
ENSMUSG00000071230	Npw	17	0.978058
ENSMUSG00000001588	Acap1	17	0.976705
ENSMUSG00000030345	Dyrk4	17	0.976361
ENSMUSG00000022871	Fetub	17	0.972278
ENSMUSG00000074128	Gm10631	17	0.971594
ENSMUSG00000031995	St14	17	0.968562
ENSMUSG00000014030	Pax5	17	0.966162
ENSMUSG00000043639	Rbm20	17	0.965879
ENSMUSG00000063594	Gng8	17	0.964966
ENSMUSG00000094353	Olfr150	17	0.963926
ENSMUSG00000017756	Slc12a7	17	0.96338
ENSMUSG00000005994	Tyrp1	17	0.963316
ENSMUSG00000085905	Gm14273	17	0.962764
ENSMUSG00000112113	Gm47698	17	0.962334
ENSMUSG00000042514	Klhl14	17	0.962105
ENSMUSG00000047040	Prr15l	17	0.961668
ENSMUSG00000063531	Sema3e	17	0.961653
ENSMUSG00000018819	Lsp1	17	0.961616
ENSMUSG00000021679	S100z	17	0.960795
ENSMUSG00000028610	Dmrtb1	17	0.958867
ENSMUSG00000099170	5730403I07Rik	17	0.958757
ENSMUSG00000086353	Gm13481	17	0.958411
ENSMUSG00000058628	Olfr875	17	0.954282
ENSMUSG00000005503	Evx1	17	0.95123
ENSMUSG00000073599	Ecscr	17	0.951006
ENSMUSG00000096606	Tpbgl	17	0.949775
ENSMUSG00000043168	4930426D05Rik	17	0.949217
ENSMUSG00000026834	Acvr1c	17	0.948982
ENSMUSG00000113553	Gm40932	17	0.948116
ENSMUSG00000019865	Nmbr	17	0.947415
ENSMUSG00000027246	Ell3	17	0.947139
ENSMUSG00000001021	S100a3	17	0.94667
ENSMUSG00000086126	Evx1os	17	0.945058
ENSMUSG00000049353	Rd3	17	0.944869
ENSMUSG00000087322	Gm16075	17	0.943755
ENSMUSG00000042607	Asb4	17	0.943667
ENSMUSG00000032528	Vipr1	17	0.939879
ENSMUSG00000111066	Gm30313	17	0.939023
ENSMUSG00000074115	Saa1	17	0.937798
ENSMUSG00000091243	Vgll3	17	0.937754
ENSMUSG00000053963	Stum	17	0.937082
ENSMUSG00000046417	Lrrc75a	17	0.936399
ENSMUSG00000040978	Gm11992	17	0.934775
ENSMUSG00000032667	Pon2	17	0.933412
ENSMUSG00000048540	Nhlh2	17	0.932847
ENSMUSG00000037020	Wdr62	17	0.931461
ENSMUSG00000048636	A730049H05Rik	17	0.9307
ENSMUSG00000029759	Pon3	17	0.930027
ENSMUSG00000074575	Kcng1	17	0.926897
ENSMUSG00000048915	Efna5	17	0.925265
ENSMUSG00000097974	Gm10605	17	0.925189
ENSMUSG00000041616	Nppa	17	0.922083
ENSMUSG00000041120	Nbl1	17	0.921795
ENSMUSG00000066026	Dhrs3	17	0.920332
ENSMUSG00000023886	Smoc2	17	0.917603
ENSMUSG00000052551	Adarb2	17	0.915665
ENSMUSG00000020374	Rasgef1c	17	0.915157
ENSMUSG00000024376	Epb41l4a	17	0.914868
ENSMUSG00000050830	Vwc2	17	0.913307
ENSMUSG00000053930	Shisa6	17	0.91261
ENSMUSG00000029359	Tesc	17	0.912394
ENSMUSG00000097482	Gm17634	17	0.911264
ENSMUSG00000020798	Spns3	17	0.910675
ENSMUSG00000106738	Gm5	17	0.909935
ENSMUSG00000020846	Rflnb	17	0.90963
ENSMUSG00000100475	Gm29543	17	0.908418
ENSMUSG00000055976	Cldn23	17	0.908157
ENSMUSG00000001815	Evx2	17	0.90754
ENSMUSG00000056380	Gpr50	17	0.907424
ENSMUSG00000001123	Lgals9	17	0.90718
ENSMUSG00000043067	Dpy19l1	17	0.905084
ENSMUSG00000031927	1700012B09Rik	17	0.9049
ENSMUSG00000041361	Myzap	17	0.904506
ENSMUSG00000002699	Lcp2	17	0.90355
ENSMUSG00000035200	Chrnb4	17	0.903375
ENSMUSG00000114210	A330084C13Rik	17	0.903359
ENSMUSG00000100837	1700063D05Rik	17	0.902974
ENSMUSG00000036437	Npy1r	17	0.900906
ENSMUSG00000026866	Kynu	18	0.99805
ENSMUSG00000044988	Ucn3	18	0.99417
ENSMUSG00000068009	Bpifb6	18	0.994139
ENSMUSG00000102123	Gm4319	18	0.993985
ENSMUSG00000101848	4933417E11Rik	18	0.99264
ENSMUSG00000026193	Fn1	18	0.988766
ENSMUSG00000078689	Mup6	18	0.985803
ENSMUSG00000051079	Rgs13	18	0.982319
ENSMUSG00000029231	Pdgfra	18	0.980691
ENSMUSG00000063651	Cnfn	18	0.979982
ENSMUSG00000073652	Apol7d	18	0.977899
ENSMUSG00000109097	Gm29683	18	0.975496
ENSMUSG00000032911	Cspg4	18	0.974148
ENSMUSG00000042436	Mfap4	18	0.973209
ENSMUSG00000089948	Far2os1	18	0.968628
ENSMUSG00000032815	Fanca	18	0.964772
ENSMUSG00000020053	Igf1	18	0.964382
ENSMUSG00000109021	Gm44812	18	0.962959
ENSMUSG00000039830	Olig2	18	0.962491
ENSMUSG00000058260	Serpina9	18	0.959704
ENSMUSG00000114649	3110006O06Rik	18	0.956446
ENSMUSG00000035033	Tbr1	18	0.955551
ENSMUSG00000101768	Gm28694	18	0.952359
ENSMUSG00000073530	Pappa2	18	0.950246
ENSMUSG00000052229	Gpr17	18	0.946856
ENSMUSG00000037984	Neurod6	18	0.943421
ENSMUSG00000110125	Gm33148	18	0.941608
ENSMUSG00000027009	Itga4	18	0.938747
ENSMUSG00000035085	1700020L24Rik	18	0.934277
ENSMUSG00000028370	Pappa	18	0.931356
ENSMUSG00000030730	Atp2a1	18	0.927334
ENSMUSG00000030551	Nr2f2	18	0.927172
ENSMUSG00000109028	Gm35842	18	0.92701
ENSMUSG00000039115	Itga9	18	0.924357
ENSMUSG00000016918	Sulf1	18	0.923918
ENSMUSG00000034000	Neu4	18	0.923084
ENSMUSG00000045179	Sox3	18	0.92307
ENSMUSG00000016995	Matn4	18	0.921088
ENSMUSG00000111221	Gm47133	18	0.920983
ENSMUSG00000041540	Sox5	18	0.918607
ENSMUSG00000031253	Srpx2	18	0.91639
ENSMUSG00000086596	Susd5	18	0.914333
ENSMUSG00000022799	Arhgap31	18	0.913579
ENSMUSG00000029819	Npy	18	0.912336
ENSMUSG00000022715	Tmem114	18	0.912282
ENSMUSG00000061524	Zic2	18	0.910602
ENSMUSG00000026468	Lhx4	19	0.996357
ENSMUSG00000026483	Niban1	19	0.995261
ENSMUSG00000093732	Gm20609	19	0.992869
ENSMUSG00000021239	Vsx2	19	0.992105
ENSMUSG00000000730	Dnmt3l	19	0.991009
ENSMUSG00000052504	Epha3	19	0.974998
ENSMUSG00000032332	Col12a1	19	0.974376
ENSMUSG00000019846	Lama4	19	0.973751
ENSMUSG00000021732	Fgf10	19	0.970221
ENSMUSG00000020702	Ccl1	19	0.961855
ENSMUSG00000053747	Sox14	19	0.955694
ENSMUSG00000051243	Islr2	19	0.950392
ENSMUSG00000015568	Lpl	19	0.947008
ENSMUSG00000032369	Plscr1	19	0.943059
ENSMUSG00000092094	Zfp804b	19	0.942924
ENSMUSG00000050944	Efcab5	19	0.941519
ENSMUSG00000037206	Islr	19	0.941281
ENSMUSG00000013584	Aldh1a2	19	0.932999
ENSMUSG00000019935	Slc17a8	19	0.927574
ENSMUSG00000037279	Ovol2	19	0.924714
ENSMUSG00000046561	Arsj	19	0.923638
ENSMUSG00000056380	Gpr50	19	0.911869
ENSMUSG00000023828	Slc22a3	19	0.909664
ENSMUSG00000039481	Nrtn	19	0.902354
ENSMUSG00000113860	Gm45949	20	0.992712
ENSMUSG00000028749	Pla2g2f	20	0.991816
ENSMUSG00000115724	Gm49087	20	0.990676
ENSMUSG00000086262	A930031H19Rik	20	0.988882
ENSMUSG00000078674	Mup18	20	0.988058
ENSMUSG00000104939	Gm33651	20	0.986339
ENSMUSG00000057465	Saa2	20	0.984176
ENSMUSG00000072596	Ear2	20	0.98405
ENSMUSG00000040706	Agmat	20	0.9838
ENSMUSG00000104691	Gm43021	20	0.982888
ENSMUSG00000090594	Gm3327	20	0.982881
ENSMUSG00000043017	Ptgir	20	0.981124
ENSMUSG00000047636	Cdcp2	20	0.980321
ENSMUSG00000010461	Eya4	20	0.975277
ENSMUSG00000041193	Pla2g5	20	0.974583
ENSMUSG00000066975	Cryba4	20	0.967952
ENSMUSG00000026414	Tnnt2	20	0.96783
ENSMUSG00000047867	Gimap6	20	0.963743
ENSMUSG00000054169	Ceacam10	20	0.96341
ENSMUSG00000021613	Hapln1	20	0.961249
ENSMUSG00000106015	Gm42980	20	0.960156
ENSMUSG00000028883	Sema3a	20	0.955943
ENSMUSG00000060962	Dmkn	20	0.955586
ENSMUSG00000074115	Saa1	20	0.9554
ENSMUSG00000063564	Col23a1	20	0.951265
ENSMUSG00000042961	Egflam	20	0.949774
ENSMUSG00000097324	Carmn	20	0.949615
ENSMUSG00000036907	C1ql2	20	0.948958
ENSMUSG00000049625	Tifab	20	0.948118
ENSMUSG00000025776	Crispld1	20	0.947345
ENSMUSG00000101308	Gm28989	20	0.944685
ENSMUSG00000029484	Anxa3	20	0.944006
ENSMUSG00000029710	Ephb4	20	0.940752
ENSMUSG00000068463	B630019A10Rik	20	0.940273
ENSMUSG00000024154	Gtf2a1l	20	0.938358
ENSMUSG00000052133	Sema5b	20	0.933464
ENSMUSG00000084973	Gm13848	20	0.931609
ENSMUSG00000110216	Gm36325	20	0.926728
ENSMUSG00000030109	Slc6a12	20	0.924982
ENSMUSG00000030108	Slc6a13	20	0.919452
ENSMUSG00000030220	Arhgdib	20	0.918854
ENSMUSG00000057098	Ebf1	20	0.908319
ENSMUSG00000103711	Tstd1	20	0.904814
ENSMUSG00000105640	Gm42912	21	0.997024
ENSMUSG00000040380	Cbln3	21	0.995001
ENSMUSG00000020428	Gabra6	21	0.989335
ENSMUSG00000001741	Il16	21	0.983715
ENSMUSG00000085653	Gm15179	21	0.981276
ENSMUSG00000110240	Gm45486	21	0.973016
ENSMUSG00000027168	Pax6	21	0.972027
ENSMUSG00000044244	Il20rb	21	0.968343
ENSMUSG00000097636	Mirt1	21	0.960654
ENSMUSG00000036826	Igflr1	21	0.960365
ENSMUSG00000034584	Exph5	21	0.959624
ENSMUSG00000032021	Crtam	21	0.959169
ENSMUSG00000044165	Bcl2l15	21	0.957885
ENSMUSG00000060791	Gmfg	21	0.957386
ENSMUSG00000051439	Cd14	21	0.955731
ENSMUSG00000029054	Gabrd	21	0.949122
ENSMUSG00000113576	Gm47658	21	0.946481
ENSMUSG00000035896	Rnase1	21	0.931966
ENSMUSG00000000805	Car4	21	0.931053
ENSMUSG00000026994	Galnt3	21	0.925101
ENSMUSG00000034701	Neurod1	21	0.924929
ENSMUSG00000041361	Myzap	21	0.922787
ENSMUSG00000041062	Mslnl	21	0.91577
ENSMUSG00000075465	Gm10837	21	0.914655
ENSMUSG00000022817	Itgb5	21	0.913158
ENSMUSG00000097934	6720483E21Rik	21	0.911594
ENSMUSG00000109305	Smim38	21	0.910974
ENSMUSG00000000318	Clec10a	21	0.910402
ENSMUSG00000037242	Clic4	21	0.907291
ENSMUSG00000038583	Pln	21	0.901437
ENSMUSG00000097408	Gm26831	22	0.987475
ENSMUSG00000096984		22	0.986198
ENSMUSG00000032204	Aqp9	22	0.985482
ENSMUSG00000038146	Notch3	22	0.979599
ENSMUSG00000024292	Cyp4f14	22	0.976726
ENSMUSG00000066258	Trim12a	22	0.9739
ENSMUSG00000020122	Egfr	22	0.973476
ENSMUSG00000032754	Slc8b1	22	0.971285
ENSMUSG00000014361	Mertk	22	0.968436
ENSMUSG00000024411	Aqp4	22	0.968289
ENSMUSG00000010064	Slc38a3	22	0.965325
ENSMUSG00000097623	B230323A14Rik	22	0.964754
ENSMUSG00000018822	Sfrp5	22	0.963851
ENSMUSG00000113186	A330076C08Rik	22	0.962781
ENSMUSG00000038094	Atp13a4	22	0.962386
ENSMUSG00000045092	S1pr1	22	0.960485
ENSMUSG00000019232	Etnppl	22	0.960239
ENSMUSG00000031639	Tlr3	22	0.959242
ENSMUSG00000001761	Smo	22	0.959172
ENSMUSG00000111221	Gm47133	22	0.954943
ENSMUSG00000059246	Foxb1	22	0.954531
ENSMUSG00000050953	Gja1	22	0.952488
ENSMUSG00000029570	Lfng	22	0.952281
ENSMUSG00000005360	Slc1a3	22	0.952207
ENSMUSG00000022122	Ednrb	22	0.948409
ENSMUSG00000026586	Prrx1	22	0.947036
ENSMUSG00000064036	Mro	22	0.94435
ENSMUSG00000111443	Gm46123	22	0.943701
ENSMUSG00000079495	Nat8f6	22	0.943489
ENSMUSG00000004872	Pax3	22	0.94348
ENSMUSG00000053861	Gm9925	22	0.942963
ENSMUSG00000029661	Col1a2	22	0.937783
ENSMUSG00000002897	Il17ra	22	0.936518
ENSMUSG00000060961	Slc4a4	22	0.935515
ENSMUSG00000009585	Apobec3	22	0.935331
ENSMUSG00000073424	Cyp4f15	22	0.932859
ENSMUSG00000029084	Cd38	22	0.931295
ENSMUSG00000040055	Gjb6	22	0.930645
ENSMUSG00000043496	Tril	22	0.930578
ENSMUSG00000006522	Itih3	22	0.930356
ENSMUSG00000024998	Plce1	22	0.928764
ENSMUSG00000020734	Grin2c	22	0.926962
ENSMUSG00000050288	Fzd2	22	0.924874
ENSMUSG00000019899	Lama2	22	0.924453
ENSMUSG00000024913	Lrp5	22	0.924175
ENSMUSG00000020424	Castor1	22	0.923327
ENSMUSG00000036949	Slc39a12	22	0.920875
ENSMUSG00000028517	Plpp3	22	0.919251
ENSMUSG00000054252	Fgfr3	22	0.919067
ENSMUSG00000029710	Ephb4	22	0.918956
ENSMUSG00000052430	Bmpr1b	22	0.917486
ENSMUSG00000028128	F3	22	0.916845
ENSMUSG00000031596	Slc7a2	22	0.914142
ENSMUSG00000035237	Lcat	22	0.910622
ENSMUSG00000078234	Klhdc7a	22	0.909394
ENSMUSG00000030029	Lrig1	22	0.909064
ENSMUSG00000030495	Slc7a10	22	0.906588
ENSMUSG00000035104	Eva1a	22	0.905747
ENSMUSG00000000957	Mmp14	22	0.904382
ENSMUSG00000007097	Atp1a2	22	0.903646
ENSMUSG00000031980	Agt	22	0.902505
ENSMUSG00000026424	Gpr37l1	22	0.901587
ENSMUSG00000027737	Slc7a11	22	0.900992
ENSMUSG00000020884	Asgr1	23	0.996545
ENSMUSG00000025216	Lbx1	23	0.991918
ENSMUSG00000090461	Iltifb	23	0.988406
ENSMUSG00000089661	Mia	23	0.988105
ENSMUSG00000075304	Sp5	23	0.987811
ENSMUSG00000074695	Il22	23	0.984136
ENSMUSG00000035456	Prdm8	23	0.98062
ENSMUSG00000029054	Gabrd	23	0.978995
ENSMUSG00000090394	4930523C07Rik	23	0.978456
ENSMUSG00000020902	Ntn1	23	0.977654
ENSMUSG00000052131	Akr1b7	23	0.977074
ENSMUSG00000034634	Ly6d	23	0.9766
ENSMUSG00000000303	Cdh1	23	0.975786
ENSMUSG00000025128	Bhlhe22	23	0.975635
ENSMUSG00000022372	Sla	23	0.973744
ENSMUSG00000025083	Afap1l2	23	0.967339
ENSMUSG00000054136	Adm2	23	0.965399
ENSMUSG00000070880	Gad1	23	0.959258
ENSMUSG00000030785	Cox6a2	23	0.954137
ENSMUSG00000028584	Lrrc38	23	0.95113
ENSMUSG00000032368	Zic1	23	0.950711
ENSMUSG00000067860	Zic3	23	0.949426
ENSMUSG00000045238	A730035I17Rik	23	0.948671
ENSMUSG00000022245	Skor1	23	0.944441
ENSMUSG00000025727	A930017K11Rik	23	0.943469
ENSMUSG00000096883	Shisa8	23	0.941336
ENSMUSG00000032021	Crtam	23	0.939286
ENSMUSG00000024593	Megf10	23	0.937026
ENSMUSG00000037771	Slc32a1	23	0.936167
ENSMUSG00000036913	Trim67	23	0.934304
ENSMUSG00000039384	Dusp10	23	0.932907
ENSMUSG00000112928	Gm47710	23	0.932776
ENSMUSG00000045877	4933415A04Rik	23	0.930866
ENSMUSG00000022306	Zfpm2	23	0.929439
ENSMUSG00000001911	Nfix	23	0.927459
ENSMUSG00000025425	St8sia5	23	0.926842
ENSMUSG00000035109	Shc4	23	0.9265
ENSMUSG00000087211	Lhx1os	23	0.925244
ENSMUSG00000029338	Antxr2	23	0.923703
ENSMUSG00000005672	Kit	23	0.920804
ENSMUSG00000052724	Gm9888	23	0.918783
ENSMUSG00000045319	Proser2	23	0.918155
ENSMUSG00000013766	Ly6g6e	23	0.916398
ENSMUSG00000018698	Lhx1	23	0.914696
ENSMUSG00000101223	4930568A12Rik	23	0.913198
ENSMUSG00000028551	Cdkn2c	23	0.912884
ENSMUSG00000024827	Gldc	23	0.911375
ENSMUSG00000005716	Pvalb	23	0.908071
ENSMUSG00000038255	Neurod2	23	0.907132
ENSMUSG00000003573	Homer3	23	0.902275
ENSMUSG00000025496	Drd4	23	0.901944
ENSMUSG00000044681	Cnpy1	23	0.900543
ENSMUSG00000032291	Crabp1	24	0.999378
ENSMUSG00000046593	Tmem215	24	0.993459
ENSMUSG00000114845	Gm47511	24	0.993377
ENSMUSG00000044719	E230025N22Rik	24	0.988765
ENSMUSG00000021675	F2rl2	24	0.986001
ENSMUSG00000045518	Onecut3	24	0.97685
ENSMUSG00000049115	Agtr1a	24	0.976824
ENSMUSG00000112129	Pbld1	24	0.969411
ENSMUSG00000054988	Agtr1b	24	0.966239
ENSMUSG00000085631	9630028H03Rik	24	0.964776
ENSMUSG00000020467	Efemp1	24	0.961112
ENSMUSG00000029917	Qrfprl	24	0.957772
ENSMUSG00000035528	Npffr2	24	0.956099
ENSMUSG00000046561	Arsj	24	0.953826
ENSMUSG00000025592	Dach2	24	0.952326
ENSMUSG00000019768	Esr1	24	0.952308
ENSMUSG00000032334	Loxl1	24	0.944499
ENSMUSG00000028971	Cort	24	0.938105
ENSMUSG00000115432	D130009I18Rik	24	0.936045
ENSMUSG00000101223	4930568A12Rik	24	0.928701
ENSMUSG00000024598	Fbn2	24	0.926956
ENSMUSG00000017969	Ptgis	24	0.922948
ENSMUSG00000033498	Strc	24	0.922899
ENSMUSG00000026344	Lypd1	24	0.922574
ENSMUSG00000021680	Crhbp	24	0.916531
ENSMUSG00000098854	Gm5118	24	0.912849
ENSMUSG00000024076	Vit	24	0.912237
ENSMUSG00000025597	Klhl4	24	0.910161
ENSMUSG00000076498	Trbc2	24	0.909331
ENSMUSG00000035540	Gc	24	0.908035
ENSMUSG00000045493	Bhlhe23	25	0.995145
ENSMUSG00000087115	Pcsk2os2	25	0.99371
ENSMUSG00000044041	Krt13	25	0.990193
ENSMUSG00000112950	Gm32369	25	0.988249
ENSMUSG00000111767	4930546K05Rik	25	0.986226
ENSMUSG00000074006	Omp	25	0.98582
ENSMUSG00000028834	Trim63	25	0.984091
ENSMUSG00000061311	Rag1	25	0.982767
ENSMUSG00000010175	Prox1	25	0.981062
ENSMUSG00000049744	Arhgap15	25	0.976194
ENSMUSG00000110462	Gm35572	25	0.975591
ENSMUSG00000112713	Gm48281	25	0.975044
ENSMUSG00000074604	Mgst2	25	0.968823
ENSMUSG00000036144	Meox2	25	0.968
ENSMUSG00000031074	Fgf3	25	0.964351
ENSMUSG00000041481	Serpina3g	25	0.964303
ENSMUSG00000059991	Nptx2	25	0.964221
ENSMUSG00000022836	Mylk	25	0.961731
ENSMUSG00000039004	Bmp6	25	0.953628
ENSMUSG00000079045	Prox1os	25	0.952783
ENSMUSG00000110727	Gm48784	25	0.93886
ENSMUSG00000059898	Dsc3	25	0.938747
ENSMUSG00000109898	6330420H09Rik	25	0.93824
ENSMUSG00000110216	Gm36325	25	0.935748
ENSMUSG00000064201	Krt2	25	0.932006
ENSMUSG00000044748	Defb1	25	0.930549
ENSMUSG00000085049	Parvaos	25	0.928591
ENSMUSG00000060962	Dmkn	25	0.925563
ENSMUSG00000031520	Vegfc	25	0.923604
ENSMUSG00000098087	Gm17750	25	0.920921
ENSMUSG00000101768	Gm28694	25	0.918802
ENSMUSG00000114649	3110006O06Rik	25	0.91317
ENSMUSG00000025176	Hoga1	25	0.912455
ENSMUSG00000010021	Kif19a	25	0.909117
ENSMUSG00000017969	Ptgis	25	0.905964
ENSMUSG00000108905	Gm44618	25	0.905633
ENSMUSG00000046314	Stxbp6	25	0.904156
ENSMUSG00000026134	Prim2	25	0.903765
ENSMUSG00000034903	Cobll1	25	0.90256
ENSMUSG00000050520	Cldn8	26	0.999421
ENSMUSG00000067001	Serpinb7	26	0.98976
ENSMUSG00000027859	Ngf	26	0.986845
ENSMUSG00000027750	Postn	26	0.981615
ENSMUSG00000041567	Serpina12	26	0.980809
ENSMUSG00000039116	Adgrg6	26	0.976317
ENSMUSG00000023336	Wfdc1	26	0.97508
ENSMUSG00000028364	Tnc	26	0.974372
ENSMUSG00000035373	Ccl7	26	0.974123
ENSMUSG00000022315	Slc30a8	26	0.971929
ENSMUSG00000039714	Cplx3	26	0.970558
ENSMUSG00000089890	Gm16055	26	0.970223
ENSMUSG00000042961	Egflam	26	0.969801
ENSMUSG00000074365	Crxos	26	0.96767
ENSMUSG00000045246	Kcng4	26	0.967595
ENSMUSG00000026009	Icos	26	0.966681
ENSMUSG00000107660	Gm6559	26	0.962733
ENSMUSG00000026285	Pdcd1	26	0.962501
ENSMUSG00000026896	Ifih1	26	0.960519
ENSMUSG00000047330	Kcne4	26	0.959726
ENSMUSG00000111240	Gm39312	26	0.958647
ENSMUSG00000032440	Tgfbr2	26	0.958311
ENSMUSG00000114701	Gm47731	26	0.957395
ENSMUSG00000110125	Gm33148	26	0.956817
ENSMUSG00000105102	Gm35507	26	0.955841
ENSMUSG00000040950	Mgl2	26	0.955806
ENSMUSG00000032380	Dapk2	26	0.954762
ENSMUSG00000013653	1810065E05Rik	26	0.953831
ENSMUSG00000052821	Cysltr1	26	0.952944
ENSMUSG00000103334	Gm29771	26	0.950315
ENSMUSG00000097794	Gm2990	26	0.947946
ENSMUSG00000049796	Crh	26	0.947839
ENSMUSG00000015365	Mov10l1	26	0.947439
ENSMUSG00000112837	Gm48053	26	0.946989
ENSMUSG00000100241	Slc18a3	26	0.946739
ENSMUSG00000004655	Aqp1	26	0.945998
ENSMUSG00000057003	Myh4	26	0.945404
ENSMUSG00000028072	Ntrk1	26	0.945183
ENSMUSG00000023886	Smoc2	26	0.944977
ENSMUSG00000116371	Gm34284	26	0.944296
ENSMUSG00000027871	Hsd3b1	26	0.943372
ENSMUSG00000033715	Akr1c14	26	0.943372
ENSMUSG00000020953	Coch	26	0.94192
ENSMUSG00000023945	Slc5a7	26	0.941167
ENSMUSG00000085089	Arhgap15os	26	0.93991
ENSMUSG00000085488	4930557F10Rik	26	0.937942
ENSMUSG00000048703	Speer4b	26	0.935734
ENSMUSG00000038009	Dnajc22	26	0.932298
ENSMUSG00000052248	Zeb2os	26	0.929241
ENSMUSG00000001076	C1ql4	26	0.928153
ENSMUSG00000009876	Cox4i2	26	0.922632
ENSMUSG00000050808	Muc15	26	0.919898
ENSMUSG00000055865	Tafa3	26	0.91936
ENSMUSG00000021919	Chat	26	0.918987
ENSMUSG00000021721	Htr1a	26	0.918159
ENSMUSG00000016758	Bik	26	0.917166
ENSMUSG00000039087	Rreb1	26	0.916621
ENSMUSG00000043088	Il17re	26	0.910671
ENSMUSG00000015484	Fam163a	26	0.910015
ENSMUSG00000027577	Chrna4	26	0.907634
ENSMUSG00000009075	Cabp7	26	0.906543
ENSMUSG00000073226	Gm10482	27	0.979105
ENSMUSG00000113867	Gm47456	27	0.979105
ENSMUSG00000025400	Tac2	27	0.975491
ENSMUSG00000039728	Slc6a5	27	0.974565
ENSMUSG00000100303	2600014E21Rik	27	0.973025
ENSMUSG00000061048	Cdh3	27	0.968903
ENSMUSG00000007480	Mc5r	27	0.96733
ENSMUSG00000073551	Spink13	27	0.966185
ENSMUSG00000018479	1700125H20Rik	27	0.96551
ENSMUSG00000010825	Grid2ip	27	0.965067
ENSMUSG00000029151	Slc30a3	27	0.963629
ENSMUSG00000113507	Gm48613	27	0.960084
ENSMUSG00000043468	Adam30	27	0.960003
ENSMUSG00000106357	Gm8013	27	0.959565
ENSMUSG00000047094	Ofcc1	27	0.95851
ENSMUSG00000114841	Gm47352	27	0.956188
ENSMUSG00000075394	Hoxc4	27	0.955635
ENSMUSG00000056054	S100a8	27	0.955282
ENSMUSG00000063651	Cnfn	27	0.953058
ENSMUSG00000018916	Csf2	27	0.952921
ENSMUSG00000113001	Gm40538	27	0.952921
ENSMUSG00000024553	Galr1	27	0.951671
ENSMUSG00000114300	Gm32243	27	0.951263
ENSMUSG00000038246	Fam50b	27	0.950101
ENSMUSG00000000318	Clec10a	27	0.949986
ENSMUSG00000085075	Gm15669	27	0.949402
ENSMUSG00000085043	Gm13184	27	0.947704
ENSMUSG00000004231	Pax2	27	0.947653
ENSMUSG00000097289		27	0.947026
ENSMUSG00000064158	Izumo1	27	0.944888
ENSMUSG00000093617	4933438K21Rik	27	0.943315
ENSMUSG00000026532	Spta1	27	0.941741
ENSMUSG00000110390	Gm45869	27	0.941258
ENSMUSG00000068048	Rhox9	27	0.939808
ENSMUSG00000004814	Ccl24	27	0.938018
ENSMUSG00000022676	Snai2	27	0.93572
ENSMUSG00000084884	Gm12289	27	0.935315
ENSMUSG00000022245	Skor1	27	0.934128
ENSMUSG00000093884	Olfr239	27	0.933741
ENSMUSG00000090260	2810442N19Rik	27	0.932028
ENSMUSG00000025127	Gcgr	27	0.929708
ENSMUSG00000089730	1700007P06Rik	27	0.926528
ENSMUSG00000105430	Gm43301	27	0.926528
ENSMUSG00000109915	7420700N18Rik	27	0.925822
ENSMUSG00000105850	Gm2861	27	0.92552
ENSMUSG00000038242	Aox4	27	0.923926
ENSMUSG00000113891	Gm47683	27	0.923429
ENSMUSG00000111037	Gm47235	27	0.921855
ENSMUSG00000023963	Cyp39a1	27	0.921654
ENSMUSG00000087264	Gad1os	27	0.919264
ENSMUSG00000107928	Gm45140	27	0.916649
ENSMUSG00000027832	Ptx3	27	0.914418
ENSMUSG00000063564	Col23a1	27	0.906863
ENSMUSG00000015957	Wnt11	27	0.905856
ENSMUSG00000091119	Ccdc152	27	0.9043
ENSMUSG00000104586	4921539H07Rik	28	0.991423
ENSMUSG00000032446	Eomes	28	0.987093
ENSMUSG00000050201	Otop2	28	0.984443
ENSMUSG00000035296	Sgcg	28	0.982221
ENSMUSG00000095845	Gm5741	28	0.98171
ENSMUSG00000067571	Ms4a15	28	0.97957
ENSMUSG00000026065	Slc9a4	28	0.97814
ENSMUSG00000025488	Cox8b	28	0.977144
ENSMUSG00000029683	Lmod2	28	0.976506
ENSMUSG00000018862	Otop3	28	0.974922
ENSMUSG00000098072	Gm26995	28	0.972954
ENSMUSG00000063975	Slco1a5	28	0.970702
ENSMUSG00000045288	Ush1g	28	0.970338
ENSMUSG00000019987	Arg1	28	0.96715
ENSMUSG00000068428	Gmnc	28	0.965664
ENSMUSG00000115263	Gm5089	28	0.965509
ENSMUSG00000042045	Sln	28	0.965395
ENSMUSG00000026805	Barhl1	28	0.96209
ENSMUSG00000075027	4631405J19Rik	28	0.960051
ENSMUSG00000064052	Gm5089	28	0.959031
ENSMUSG00000086254	3100003L05Rik	28	0.95884
ENSMUSG00000026167	Wnt10a	28	0.95495
ENSMUSG00000026668	Ucma	28	0.950481
ENSMUSG00000111059	Gm33838	28	0.950215
ENSMUSG00000036972	Zic4	28	0.94957
ENSMUSG00000091402	Rd3l	28	0.947846
ENSMUSG00000014198	Zfp385c	28	0.946762
ENSMUSG00000095101	Gm13285	28	0.945744
ENSMUSG00000025481	Urah	28	0.944248
ENSMUSG00000048292	Olfr1417	28	0.942512
ENSMUSG00000048200	Cracr2b	28	0.940772
ENSMUSG00000087485	Gm13383	28	0.940359
ENSMUSG00000055333	Fat2	28	0.9375
ENSMUSG00000106588	Gm17590	28	0.937305
ENSMUSG00000028008	Asic5	28	0.936247
ENSMUSG00000024871	Doc2g	28	0.935957
ENSMUSG00000020096	Tbata	28	0.935054
ENSMUSG00000048458	Inka2	28	0.934092
ENSMUSG00000085865	Gm15966	28	0.932634
ENSMUSG00000102424	Paupar	28	0.932495
ENSMUSG00000085663	Gm15718	28	0.930413
ENSMUSG00000068794	Col28a1	28	0.930066
ENSMUSG00000032368	Zic1	28	0.929635
ENSMUSG00000097540		28	0.928421
ENSMUSG00000021281	Tnfaip2	28	0.925429
ENSMUSG00000110692	Gm33460	28	0.925388
ENSMUSG00000086029	Pax6os1	28	0.924024
ENSMUSG00000051354	Samd3	28	0.923454
ENSMUSG00000024749	Tmc1	28	0.9176
ENSMUSG00000070570	Slc17a7	28	0.91759
ENSMUSG00000043144	Aqp6	28	0.916632
ENSMUSG00000027168	Pax6	28	0.913705
ENSMUSG00000043753	Dmrta1	28	0.913163
ENSMUSG00000032978	Guca2b	28	0.91205
ENSMUSG00000006445	Epha2	28	0.911835
ENSMUSG00000002769	Gnmt	28	0.90696
ENSMUSG00000028965	Tnfrsf9	28	0.905737
ENSMUSG00000111926	Gm46204	28	0.905509
ENSMUSG00000034164	Emid1	28	0.904002
ENSMUSG00000104015	Gm10745	29	0.990137
ENSMUSG00000091204	Gm7271	29	0.989444
ENSMUSG00000085323	9130410C08Rik	29	0.988789
ENSMUSG00000051490	Foxd4	29	0.982861
ENSMUSG00000050276	Mrgprg	29	0.981487
ENSMUSG00000116324	Gm33696	29	0.977235
ENSMUSG00000105910	Gm43539	29	0.976293
ENSMUSG00000113124	Gm47193	29	0.975038
ENSMUSG00000046186	Cd109	29	0.974629
ENSMUSG00000037279	Ovol2	29	0.972577
ENSMUSG00000103386	Gm37751	29	0.972195
ENSMUSG00000115680	Gm35167	29	0.969221
ENSMUSG00000105912	Gm10440	29	0.968793
ENSMUSG00000033498	Strc	29	0.966748
ENSMUSG00000021647	Cartpt	29	0.964963
ENSMUSG00000116660	9030404E10Rik	29	0.963935
ENSMUSG00000035540	Gc	29	0.963368
ENSMUSG00000051431	Gpr87	29	0.960447
ENSMUSG00000086170	Gm12144	29	0.95971
ENSMUSG00000031449	Atp4b	29	0.956987
ENSMUSG00000086096	Gm12688	29	0.956405
ENSMUSG00000027315	Spint1	29	0.955666
ENSMUSG00000029423	Piwil1	29	0.952775
ENSMUSG00000101126	Gm10538	29	0.949303
ENSMUSG00000070717	Gm10300	29	0.949238
ENSMUSG00000020865	Abcc3	29	0.942226
ENSMUSG00000087413	Gm11266	29	0.941266
ENSMUSG00000027171	Prrg4	29	0.932528
ENSMUSG00000047250	Ptgs1	29	0.928973
ENSMUSG00000029819	Npy	29	0.925865
ENSMUSG00000090634	Gm8126	29	0.922518
ENSMUSG00000021743	Fezf2	29	0.922143
ENSMUSG00000071489	Ptgdr	29	0.920148
ENSMUSG00000029490	Mfsd7a	29	0.916866
ENSMUSG00000020566	Atp6v1c2	29	0.912249
ENSMUSG00000048776	Pthlh	29	0.908855
ENSMUSG00000035429	Ptprh	29	0.907313
ENSMUSG00000021108	Prkch	29	0.902223
ENSMUSG00000026331	Slco6c1	30	0.983293
ENSMUSG00000085295	4930430E12Rik	30	0.981185
ENSMUSG00000098127	Gm4665	30	0.980527
ENSMUSG00000108569		30	0.977368
ENSMUSG00000051747	Ttn	30	0.975186
ENSMUSG00000112952	Gm48336	30	0.971701
ENSMUSG00000050030	Olfr728	30	0.969683
ENSMUSG00000062329	Cytl1	30	0.969664
ENSMUSG00000104677	Gm43376	30	0.969456
ENSMUSG00000032776	Mctp2	30	0.967249
ENSMUSG00000086662	BC046251	30	0.964201
ENSMUSG00000114278	Gm49027	30	0.963475
ENSMUSG00000079694	Gm14862	30	0.961089
ENSMUSG00000054598	9130230L23Rik	30	0.960406
ENSMUSG00000029994	Anxa4	30	0.958318
ENSMUSG00000038903	Ccdc68	30	0.951919
ENSMUSG00000054892	Txk	30	0.951901
ENSMUSG00000025716	Myo3a	30	0.95185
ENSMUSG00000044350	Lacc1	30	0.951179
ENSMUSG00000081650	Gm16181	30	0.950696
ENSMUSG00000036185	Sapcd1	30	0.949857
ENSMUSG00000100572	2410021H03Rik	30	0.949755
ENSMUSG00000020264	Slc36a2	30	0.949488
ENSMUSG00000005950	P2rx5	30	0.948952
ENSMUSG00000045679	Pqlc3	30	0.948677
ENSMUSG00000112058	Gm47593	30	0.948067
ENSMUSG00000056313	Tcim	30	0.947127
ENSMUSG00000040274	Cdk6	30	0.946714
ENSMUSG00000039814	Xkr5	30	0.944665
ENSMUSG00000050896	Rtn4rl2	30	0.944603
ENSMUSG00000028463	Car9	30	0.944559
ENSMUSG00000111102	Gm48189	30	0.944254
ENSMUSG00000060205	Olfr57	30	0.944179
ENSMUSG00000097232	Gm26854	30	0.942814
ENSMUSG00000007030	Vwa7	30	0.942101
ENSMUSG00000022997	Wnt1	30	0.941494
ENSMUSG00000027559	Car3	30	0.941443
ENSMUSG00000108777	Gm45081	30	0.940931
ENSMUSG00000097435	Gm26783	30	0.940197
ENSMUSG00000048230	Fbxo43	30	0.9391
ENSMUSG00000103108	Rncr4	30	0.938947
ENSMUSG00000028544	Slc5a9	30	0.938944
ENSMUSG00000022758	P2rx6	30	0.935123
ENSMUSG00000038045	Sult6b1	30	0.934354
ENSMUSG00000018554	Ybx2	30	0.93235
ENSMUSG00000107496	4933431M02Rik	30	0.931954
ENSMUSG00000113974	4930442G10Rik	30	0.931256
ENSMUSG00000029797	Sspo	30	0.929918
ENSMUSG00000111577	Gm47136	30	0.928186
ENSMUSG00000078486	Perm1	30	0.92801
ENSMUSG00000087625	4930419G24Rik	30	0.927013
ENSMUSG00000038756	Ttll6	30	0.927013
ENSMUSG00000061171	Slc38a11	30	0.926952
ENSMUSG00000034452	Slc24a1	30	0.926791
ENSMUSG00000032523	Hhatl	30	0.92475
ENSMUSG00000087549	Gm13427	30	0.923139
ENSMUSG00000035473	Galm	30	0.922905
ENSMUSG00000048652	Samd13	30	0.921216
ENSMUSG00000029188	Slc34a2	30	0.920328
ENSMUSG00000100650	Gm28807	30	0.915008
ENSMUSG00000101411	Gm28111	30	0.914433
ENSMUSG00000027505	Fam209	30	0.914422
ENSMUSG00000025432	Avil	30	0.914045
ENSMUSG00000032593	Amigo3	30	0.913553
ENSMUSG00000102037	Bcl2a1a	30	0.911804
ENSMUSG00000051043	Gprc5c	30	0.911055
ENSMUSG00000034959	Rubcnl	30	0.908116
ENSMUSG00000006179	Prss16	30	0.907413
ENSMUSG00000042258	Isl1	30	0.906751
ENSMUSG00000021998	Lcp1	30	0.906252
ENSMUSG00000097617	Gm10687	30	0.904984
ENSMUSG00000021760	Gpx8	30	0.904086
ENSMUSG00000024043	Arhgap28	31	0.990441
ENSMUSG00000001020	S100a4	31	0.989976
ENSMUSG00000018604	Tbx3	31	0.989433
ENSMUSG00000054763	Defb42	31	0.988216
ENSMUSG00000078302	Foxd1	31	0.985393
ENSMUSG00000071340	Trappc3l	31	0.98223
ENSMUSG00000017446	C1qtnf1	31	0.975879
ENSMUSG00000096982	Redrum	31	0.973688
ENSMUSG00000027356	Fermt1	31	0.972837
ENSMUSG00000032318	Isl2	31	0.971883
ENSMUSG00000067438	Hmx1	31	0.970923
ENSMUSG00000005611	Irag1	31	0.968708
ENSMUSG00000055865	Tafa3	31	0.968242
ENSMUSG00000032643	Fhl3	31	0.967991
ENSMUSG00000027985	Lef1	31	0.967153
ENSMUSG00000110459	Gm31717	31	0.964191
ENSMUSG00000085604	Dhx58os	31	0.9639
ENSMUSG00000095956	1700036A12Rik	31	0.963701
ENSMUSG00000115432	D130009I18Rik	31	0.962603
ENSMUSG00000024784	Gpha2	31	0.961365
ENSMUSG00000024497	Pou4f3	31	0.960425
ENSMUSG00000039349	C130074G19Rik	31	0.952548
ENSMUSG00000041476	Smpx	31	0.951583
ENSMUSG00000009900	Wnt3a	31	0.951382
ENSMUSG00000085755	Gm13496	31	0.95109
ENSMUSG00000026389	Steap3	31	0.950692
ENSMUSG00000079164	Tlr5	31	0.950511
ENSMUSG00000068117	Mei1	31	0.950511
ENSMUSG00000020178	Adora2a	31	0.948718
ENSMUSG00000106086	Lef1os1	31	0.948711
ENSMUSG00000084850	Gm12092	31	0.947208
ENSMUSG00000046500	Tafa4	31	0.94692
ENSMUSG00000090667	Mdfic2	31	0.945859
ENSMUSG00000112705	Gm47552	31	0.945023
ENSMUSG00000021565	Slc6a19	31	0.944983
ENSMUSG00000045281	Gpr20	31	0.944501
ENSMUSG00000020191	Spata48	31	0.941869
ENSMUSG00000047878	A4galt	31	0.939932
ENSMUSG00000018566	Slc2a4	31	0.934796
ENSMUSG00000028635	Edn2	31	0.934638
ENSMUSG00000085748	Gm12280	31	0.934304
ENSMUSG00000031665	Sall1	31	0.933962
ENSMUSG00000074359	Psg23	31	0.933518
ENSMUSG00000113739	Gm48584	31	0.933518
ENSMUSG00000048070	Pirt	31	0.933436
ENSMUSG00000034683	Ppp1r1c	31	0.932901
ENSMUSG00000116610	Gm49678	31	0.932387
ENSMUSG00000044062	Plekhd1os	31	0.930307
ENSMUSG00000046480	Scn4b	31	0.927804
ENSMUSG00000067586	S1pr3	31	0.926682
ENSMUSG00000059741	Myl3	31	0.925479
ENSMUSG00000091017	Fam71a	31	0.925042
ENSMUSG00000104677	Gm43376	31	0.921625
ENSMUSG00000026315	Serpinb8	31	0.921047
ENSMUSG00000041730	Prrxl1	31	0.920945
ENSMUSG00000085421	4732490B19Rik	31	0.920872
ENSMUSG00000087516	Tbx3os1	31	0.919943
ENSMUSG00000074203	G430095P16Rik	31	0.919696
ENSMUSG00000043279	Trim56	31	0.919401
ENSMUSG00000072812		31	0.915746
ENSMUSG00000053647	Gper1	31	0.915663
ENSMUSG00000067698	Gm10220	31	0.913753
ENSMUSG00000018830	Myh11	31	0.913698
ENSMUSG00000048108	Tmem72	31	0.910979
ENSMUSG00000051043	Gprc5c	31	0.908793
ENSMUSG00000044447	Dock5	31	0.908542
ENSMUSG00000086284	Frmpd1os	31	0.907056
ENSMUSG00000033107	Rnf125	31	0.905072
ENSMUSG00000054951	9130008F23Rik	31	0.901134
ENSMUSG00000033788	Dysf	31	0.900814
ENSMUSG00000085723	Gm15915	32	0.99779
ENSMUSG00000106082	4930404A12Rik	32	0.991278
ENSMUSG00000029074	Ttll10	32	0.985303
ENSMUSG00000107386	Gm42800	32	0.984577
ENSMUSG00000023902	Zscan10	32	0.983227
ENSMUSG00000105271	Gm42875	32	0.980042
ENSMUSG00000025196	Cpn1	32	0.975186
ENSMUSG00000030263	Lrmp	32	0.971868
ENSMUSG00000114623	Gm34788	32	0.970395
ENSMUSG00000037921	Ddx60	32	0.969804
ENSMUSG00000085471	4933423P22Rik	32	0.968877
ENSMUSG00000027887	Sypl2	32	0.966542
ENSMUSG00000034117	Ptgdr2	32	0.964823
ENSMUSG00000108657	Gm35611	32	0.964725
ENSMUSG00000030617	Ccdc83	32	0.964565
ENSMUSG00000097282	5031415H12Rik	32	0.962328
ENSMUSG00000058046	4933430I17Rik	32	0.961977
ENSMUSG00000109898	6330420H09Rik	32	0.961915
ENSMUSG00000021509	Slc25a48	32	0.955532
ENSMUSG00000024972	Lgals12	32	0.953185
ENSMUSG00000043747	1520401A03Rik	32	0.952286
ENSMUSG00000048473	Sult6b2	32	0.951056
ENSMUSG00000115692	Gm49163	32	0.95099
ENSMUSG00000085068	Gm15895	32	0.95095
ENSMUSG00000061414	Cracr2a	32	0.94704
ENSMUSG00000116813	4930579D07Rik	32	0.941719
ENSMUSG00000097004	4731419I09Rik	32	0.938656
ENSMUSG00000085833	Gm13003	32	0.938217
ENSMUSG00000045052	Prlhr	32	0.936678
ENSMUSG00000090634	Gm8126	32	0.936371
ENSMUSG00000053852	Adgrg4	32	0.935915
ENSMUSG00000090272	Mndal	32	0.933602
ENSMUSG00000019846	Lama4	32	0.931517
ENSMUSG00000030399	Ckm	32	0.930606
ENSMUSG00000025329	Padi1	32	0.923105
ENSMUSG00000061816	Myl1	32	0.920644
ENSMUSG00000021743	Fezf2	32	0.92061
ENSMUSG00000057346	Apol9a	32	0.917978
ENSMUSG00000109853	Gm33045	32	0.913842
ENSMUSG00000100967	Gm29666	32	0.912823
ENSMUSG00000037206	Islr	32	0.910479
ENSMUSG00000001166	Oas1c	32	0.90785
ENSMUSG00000097411	B430218F22Rik	32	0.907702
ENSMUSG00000049929	Lpar4	32	0.906369
ENSMUSG00000023995	Tspo2	32	0.906194
ENSMUSG00000040428	Plekha4	32	0.903765
ENSMUSG00000106445	Gm21190	32	0.902136
