# Supplementary material
Source: Research Square preprint supplement (doi:10.21203/rs.3.rs-9822028/v1)
Supplement: Supplementary file 3 [file ca1f2384e28468caa03b16d5.xlsx]

## Sheet: Sheet1
gene	Symbol	Cluster	Specificity Score
ENSMUSG00000087085	Gm12068	1	0.993714
ENSMUSG00000001773	Folh1	1	0.991136
ENSMUSG00000026778	Prkcq	1	0.988202
ENSMUSG00000026604	Ptpn14	1	0.984703
ENSMUSG00000044447	Dock5	1	0.979328
ENSMUSG00000035513	Ntng2	1	0.975363
ENSMUSG00000028584	Lrrc38	1	0.975001
ENSMUSG00000052942	Glis3	1	0.971692
ENSMUSG00000022705	Drd3	1	0.971025
ENSMUSG00000036437	Npy1r	1	0.963514
ENSMUSG00000019876	Pkib	1	0.96216
ENSMUSG00000039087	Rreb1	1	0.961613
ENSMUSG00000027849	Syt6	1	0.959218
ENSMUSG00000035615	Frmpd1	1	0.952538
ENSMUSG00000010797	Wnt2	1	0.951208
ENSMUSG00000022816	Fstl1	1	0.949612
ENSMUSG00000022949	Clic6	1	0.946482
ENSMUSG00000053441	Adamts19	1	0.946468
ENSMUSG00000035273	Hpse	1	0.944405
ENSMUSG00000043441	Gpr149	1	0.943804
ENSMUSG00000040125	Gpr26	1	0.943705
ENSMUSG00000060429	Sntb1	1	0.943322
ENSMUSG00000037579	Kcnh3	1	0.937202
ENSMUSG00000086892	4933430M04Rik	1	0.934732
ENSMUSG00000029101	Rgs12	1	0.934077
ENSMUSG00000073103	Gm10466	1	0.931215
ENSMUSG00000030069	Prok2	1	0.931123
ENSMUSG00000061762	Tac1	1	0.929669
ENSMUSG00000029217	Tec	1	0.929651
ENSMUSG00000025938	Slco5a1	1	0.92805
ENSMUSG00000035021	Baz1a	1	0.926733
ENSMUSG00000047935	Sox1ot	1	0.9267
ENSMUSG00000079499	6530402F18Rik	1	0.92417
ENSMUSG00000036022	Fam122b	1	0.92203
ENSMUSG00000060424	Pantr1	1	0.916406
ENSMUSG00000038370	Pcp4l1	1	0.916222
ENSMUSG00000037016	Frem2	1	0.915953
ENSMUSG00000053063	Clec12a	1	0.915644
ENSMUSG00000068270	Shroom4	1	0.914033
ENSMUSG00000024107	Lhcgr	1	0.91391
ENSMUSG00000087145	Gm12665	1	0.913472
ENSMUSG00000026322	Htr4	1	0.911854
ENSMUSG00000022912	Pros1	1	0.910339
ENSMUSG00000090125	Pou3f1	1	0.907907
ENSMUSG00000030530	Furin	1	0.906454
ENSMUSG00000042401	Crtac1	1	0.905549
ENSMUSG00000039239	Tgfb2	1	0.901326
ENSMUSG00000086333	1700120E14Rik	2	0.993284
ENSMUSG00000021948	Prkcd	2	0.992495
ENSMUSG00000025885	Myo5b	2	0.988758
ENSMUSG00000068245	Phf11d	2	0.982186
ENSMUSG00000037242	Clic4	2	0.977847
ENSMUSG00000039410	Prdm16	2	0.976209
ENSMUSG00000072791	Abcb5	2	0.970078
ENSMUSG00000079466	Prdm12	2	0.969901
ENSMUSG00000085654	Gm12536	2	0.968724
ENSMUSG00000086902	Gm11728	2	0.967831
ENSMUSG00000031075	Ano1	2	0.96732
ENSMUSG00000086565	Gm13133	2	0.966758
ENSMUSG00000085069	Prdm16os	2	0.966415
ENSMUSG00000038115	Ano2	2	0.959029
ENSMUSG00000027570	Col9a3	2	0.958666
ENSMUSG00000103181	A330069K06Rik	2	0.954909
ENSMUSG00000048562	Sp8	2	0.947912
ENSMUSG00000031354	Amelx	2	0.947833
ENSMUSG00000086810	Gm13110	2	0.941534
ENSMUSG00000027748	Trpc4	2	0.939085
ENSMUSG00000021750	Fam107a	2	0.936668
ENSMUSG00000003418	St8sia6	2	0.93553
ENSMUSG00000087075	Lbhd2	2	0.933064
ENSMUSG00000046321	Hs3st2	2	0.925601
ENSMUSG00000102483	Catspere1	2	0.919161
ENSMUSG00000040969	Arhgef38	2	0.916592
ENSMUSG00000038764	Ptpn3	2	0.915129
ENSMUSG00000084987	Gm13134	2	0.911538
ENSMUSG00000049123	Catsperg2	2	0.904138
ENSMUSG00000020007	Il20ra	3	0.974694
ENSMUSG00000046782	Ttc6	3	0.97413
ENSMUSG00000084890	A830036E02Rik	3	0.971526
ENSMUSG00000032343	Impg1	3	0.971499
ENSMUSG00000030905	Crym	3	0.971316
ENSMUSG00000085944	1700003D09Rik	3	0.97114
ENSMUSG00000057719	Sh3rf2	3	0.970089
ENSMUSG00000097922		3	0.969227
ENSMUSG00000037679	Inf2	3	0.968939
ENSMUSG00000020912	Krt12	3	0.967715
ENSMUSG00000029054	Gabrd	3	0.963005
ENSMUSG00000061718	Ppp1r1b	3	0.960359
ENSMUSG00000039335	Spata16	3	0.959522
ENSMUSG00000101054	Gm18406	3	0.956676
ENSMUSG00000037148	Arhgap10	3	0.953896
ENSMUSG00000097652	Mhrt	3	0.953807
ENSMUSG00000046480	Scn4b	3	0.949117
ENSMUSG00000032528	Vipr1	3	0.947852
ENSMUSG00000027296	Itpka	3	0.946413
ENSMUSG00000039831	Arhgap29	3	0.945309
ENSMUSG00000021478	Drd1	3	0.944436
ENSMUSG00000071234	Syndig1l	3	0.939257
ENSMUSG00000097993	Ptprv	3	0.933656
ENSMUSG00000027400	Pdyn	3	0.931751
ENSMUSG00000028125	Abca4	3	0.929064
ENSMUSG00000054555	Adam12	3	0.928902
ENSMUSG00000044350	Lacc1	3	0.928482
ENSMUSG00000027239	Mdk	3	0.927879
ENSMUSG00000022237	Ankrd33b	3	0.927038
ENSMUSG00000060961	Slc4a4	3	0.916649
ENSMUSG00000030930	Chst15	3	0.914334
ENSMUSG00000043635	Adamts3	3	0.914092
ENSMUSG00000022705	Drd3	3	0.913358
ENSMUSG00000098501	Gm19272	3	0.912824
ENSMUSG00000039629	Strip2	3	0.911689
ENSMUSG00000038115	Ano2	3	0.910085
ENSMUSG00000038932	Tcfl5	3	0.909682
ENSMUSG00000019936	Epyc	3	0.90929
ENSMUSG00000050473	Slc35d3	3	0.907164
ENSMUSG00000103114	Gm32200	3	0.906255
ENSMUSG00000028661	Epha8	3	0.905508
ENSMUSG00000032402	Smad3	3	0.902028
ENSMUSG00000041644	Slc5a12	3	0.901646
ENSMUSG00000047712	Ust	3	0.900914
ENSMUSG00000020178	Adora2a	4	0.997535
ENSMUSG00000032259	Drd2	4	0.995267
ENSMUSG00000033427	Upb1	4	0.990819
ENSMUSG00000097922		4	0.981078
ENSMUSG00000057719	Sh3rf2	4	0.976556
ENSMUSG00000037679	Inf2	4	0.969259
ENSMUSG00000046922	Gpr6	4	0.968452
ENSMUSG00000041771	Slc24a4	4	0.967878
ENSMUSG00000046480	Scn4b	4	0.966204
ENSMUSG00000045573	Penk	4	0.964917
ENSMUSG00000033910	Gucy1a1	4	0.961567
ENSMUSG00000064036	Mro	4	0.961446
ENSMUSG00000084890	A830036E02Rik	4	0.957826
ENSMUSG00000050511	Oprd1	4	0.957178
ENSMUSG00000032257	Ankk1	4	0.956567
ENSMUSG00000097652	Mhrt	4	0.951545
ENSMUSG00000029054	Gabrd	4	0.951012
ENSMUSG00000033960	Jcad	4	0.949643
ENSMUSG00000023249	Parp3	4	0.946836
ENSMUSG00000048240	Gng7	4	0.935699
ENSMUSG00000020912	Krt12	4	0.934451
ENSMUSG00000039335	Spata16	4	0.932357
ENSMUSG00000022237	Ankrd33b	4	0.932149
ENSMUSG00000034898	Filip1	4	0.931275
ENSMUSG00000025915	Sgk3	4	0.928886
ENSMUSG00000061718	Ppp1r1b	4	0.928679
ENSMUSG00000008845	Cd163	4	0.92533
ENSMUSG00000085944	1700003D09Rik	4	0.924862
ENSMUSG00000084628		4	0.924599
ENSMUSG00000030905	Crym	4	0.92401
ENSMUSG00000062319	Gm10115	4	0.923582
ENSMUSG00000085996	A830012C17Rik	4	0.923029
ENSMUSG00000033416	Gucd1	4	0.921951
ENSMUSG00000102796	Gm37711	4	0.920623
ENSMUSG00000058260	Serpina9	4	0.920132
ENSMUSG00000028885	Smpdl3b	4	0.919974
ENSMUSG00000030775	Trat1	4	0.917251
ENSMUSG00000017491	Rarb	4	0.917208
ENSMUSG00000064776	Gm25203	4	0.916879
ENSMUSG00000035775	Krt20	4	0.91638
ENSMUSG00000059456	Ptk2b	4	0.914263
ENSMUSG00000032402	Smad3	4	0.914168
ENSMUSG00000023800	Tiam2	4	0.910016
ENSMUSG00000033174	Mgll	4	0.907325
ENSMUSG00000060961	Slc4a4	4	0.905392
ENSMUSG00000029026	Trp73	5	1
ENSMUSG00000034384	Barhl2	5	0.993669
ENSMUSG00000029546	Uncx	5	0.989463
ENSMUSG00000051354	Samd3	5	0.97919
ENSMUSG00000054072	Iigp1	5	0.975795
ENSMUSG00000018698	Lhx1	5	0.973037
ENSMUSG00000022887	Masp1	5	0.969578
ENSMUSG00000087211	Lhx1os	5	0.967903
ENSMUSG00000085549	1700047F07Rik	5	0.964563
ENSMUSG00000026147	Col9a1	5	0.956546
ENSMUSG00000005892	Trh	5	0.954818
ENSMUSG00000019913	Sim1	5	0.954368
ENSMUSG00000097248	Gm2694	5	0.953031
ENSMUSG00000027996	Sfrp2	5	0.952551
ENSMUSG00000048939	Atp13a5	5	0.949393
ENSMUSG00000035033	Tbr1	5	0.947402
ENSMUSG00000098649	Gm27199	5	0.944704
ENSMUSG00000039109	F13a1	5	0.93556
ENSMUSG00000087400	Gm15270	5	0.932222
ENSMUSG00000087104	Tmem132cos	5	0.927769
ENSMUSG00000077391	Gm24336	5	0.927491
ENSMUSG00000086904	Gm13404	5	0.923063
ENSMUSG00000097992	Gm27016	5	0.919525
ENSMUSG00000070366	Plpp4	5	0.913354
ENSMUSG00000021685	Otp	5	0.911559
ENSMUSG00000047161	Chst9	6	0.993319
ENSMUSG00000017897	Eya2	6	0.982493
ENSMUSG00000101448	Gm28494	6	0.978579
ENSMUSG00000091455	Otogl	6	0.978421
ENSMUSG00000035258	Abi3bp	6	0.976292
ENSMUSG00000098097	6530403H02Rik	6	0.974816
ENSMUSG00000050296	Abca12	6	0.969428
ENSMUSG00000026344	Lypd1	6	0.966052
ENSMUSG00000022246	Rai14	6	0.965803
ENSMUSG00000046982	Tshz1	6	0.964845
ENSMUSG00000034533	Scn10a	6	0.964681
ENSMUSG00000085222	Gm13974	6	0.962684
ENSMUSG00000084908	C79798	6	0.955518
ENSMUSG00000031557	Plekha2	6	0.955224
ENSMUSG00000050783	Htr1f	6	0.953861
ENSMUSG00000001911	Nfix	6	0.953265
ENSMUSG00000001119	Col6a1	6	0.94299
ENSMUSG00000035528	Npffr2	6	0.939844
ENSMUSG00000035274	Tpbg	6	0.938936
ENSMUSG00000045672	Col27a1	6	0.937015
ENSMUSG00000020566	Atp6v1c2	6	0.927223
ENSMUSG00000103642	Gm37769	6	0.925038
ENSMUSG00000086328	2700033N17Rik	6	0.924908
ENSMUSG00000035314	Gdpd5	6	0.924763
ENSMUSG00000086308	G630016G05Rik	6	0.921397
ENSMUSG00000092196	Gm38505	6	0.920729
ENSMUSG00000063564	Col23a1	6	0.914289
ENSMUSG00000104508	Gm37735	6	0.913005
ENSMUSG00000027210	Meis2	6	0.912498
ENSMUSG00000020422	Tns3	6	0.911072
ENSMUSG00000035551	Igfbpl1	6	0.910246
ENSMUSG00000042641	Rgsl1	6	0.908929
ENSMUSG00000008575	Nfib	6	0.906977
ENSMUSG00000029563	Foxp2	6	0.906009
ENSMUSG00000035493	Tgfbi	6	0.90187
ENSMUSG00000089901	Gm8113	7	0.99107
ENSMUSG00000085562	2610028E06Rik	7	0.991066
ENSMUSG00000103753	Gm6934	7	0.981996
ENSMUSG00000026890	Lhx6	7	0.973022
ENSMUSG00000026042	Col5a2	7	0.968763
ENSMUSG00000081211	Gm14886	7	0.96834
ENSMUSG00000032360	Hcrtr2	7	0.967535
ENSMUSG00000085500	Gm16976	7	0.966974
ENSMUSG00000032358	Fam83b	7	0.965556
ENSMUSG00000051910	Sox6	7	0.964952
ENSMUSG00000067724	Gbx1	7	0.962654
ENSMUSG00000067399	Trim43c	7	0.962289
ENSMUSG00000094627	Gm10182	7	0.961861
ENSMUSG00000023927	Satb1	7	0.960639
ENSMUSG00000074149	Gm10634	7	0.957732
ENSMUSG00000104330	Gm38285	7	0.945318
ENSMUSG00000024421	Lama3	7	0.944643
ENSMUSG00000015112	Slc25a13	7	0.943333
ENSMUSG00000095139	Pou3f2	7	0.941998
ENSMUSG00000104420	E230020A03Rik	7	0.940699
ENSMUSG00000090061	Nwd2	7	0.939841
ENSMUSG00000066438	Plekhd1	7	0.939473
ENSMUSG00000102744	5830444F18Rik	7	0.937899
ENSMUSG00000087618	Gm14114	7	0.935416
ENSMUSG00000059898	Dsc3	7	0.93329
ENSMUSG00000093400	Gm20647	7	0.931728
ENSMUSG00000005220	Corin	7	0.929992
ENSMUSG00000097177	9330159M07Rik	7	0.924625
ENSMUSG00000054934	Kcnmb4	7	0.921416
ENSMUSG00000020836	Coro6	7	0.918644
ENSMUSG00000001750	Tcirg1	7	0.911253
ENSMUSG00000085837	Kcnmb4os2	7	0.90663
ENSMUSG00000035277	Arx	7	0.902941
ENSMUSG00000021217	Tshz3	7	0.901828
ENSMUSG00000051839	Gypa	8	0.99446
ENSMUSG00000036523	Greb1	8	0.99427
ENSMUSG00000020000	Moxd1	8	0.99396
ENSMUSG00000042353	Frem3	8	0.99379
ENSMUSG00000021055	Esr2	8	0.990274
ENSMUSG00000046167	Gldn	8	0.978294
ENSMUSG00000101559	Gm28258	8	0.976859
ENSMUSG00000086355	4933428C19Rik	8	0.976569
ENSMUSG00000074852	Hpse2	8	0.964692
ENSMUSG00000033740	St18	8	0.954881
ENSMUSG00000100005	B130024G19Rik	8	0.952926
ENSMUSG00000087022	9130024F11Rik	8	0.946887
ENSMUSG00000074343	Gldnos	8	0.944937
ENSMUSG00000030551	Nr2f2	8	0.937578
ENSMUSG00000010175	Prox1	8	0.936317
ENSMUSG00000051860	Samd7	8	0.934716
ENSMUSG00000048747	E130114P18Rik	8	0.934699
ENSMUSG00000091345	Col6a5	8	0.934549
ENSMUSG00000019846	Lama4	8	0.933028
ENSMUSG00000046593	Tmem215	8	0.929567
ENSMUSG00000029468	P2rx7	8	0.926109
ENSMUSG00000079173	Zan	8	0.924032
ENSMUSG00000038331	Satb2	8	0.920768
ENSMUSG00000079045	Prox1os	8	0.913717
ENSMUSG00000028222	Calb1	8	0.913425
ENSMUSG00000064325	Hhip	8	0.910969
ENSMUSG00000087597	Gm15345	8	0.909584
ENSMUSG00000097183	Gm17501	9	0.991296
ENSMUSG00000032128	Robo3	9	0.989484
ENSMUSG00000085221	Gm11309	9	0.985416
ENSMUSG00000097178	2310002F09Rik	9	0.984954
ENSMUSG00000067724	Gbx1	9	0.981524
ENSMUSG00000087507	Gm16141	9	0.977792
ENSMUSG00000024593	Megf10	9	0.976826
ENSMUSG00000103216	Gm37248	9	0.976122
ENSMUSG00000039232	Stx11	9	0.970973
ENSMUSG00000076617	Ighm	9	0.970887
ENSMUSG00000020160	Meis1	9	0.969899
ENSMUSG00000034773	Hrob	9	0.968678
ENSMUSG00000001988	Npas1	9	0.967151
ENSMUSG00000084979	Gm16267	9	0.965018
ENSMUSG00000104244	2900018N21Rik	9	0.964897
ENSMUSG00000085743	8430419K02Rik	9	0.961812
ENSMUSG00000103779	Gm36931	9	0.96172
ENSMUSG00000044430	Klk12	9	0.959902
ENSMUSG00000012211	Tex22	9	0.959225
ENSMUSG00000005220	Corin	9	0.956566
ENSMUSG00000033386	Frrs1	9	0.956375
ENSMUSG00000041741	Pde3a	9	0.953046
ENSMUSG00000104420	E230020A03Rik	9	0.952208
ENSMUSG00000023927	Satb1	9	0.948121
ENSMUSG00000100650	Gm28807	9	0.947578
ENSMUSG00000021217	Tshz3	9	0.946822
ENSMUSG00000102600	Gm37266	9	0.945848
ENSMUSG00000075217	Fads2b	9	0.944951
ENSMUSG00000031636	Pdlim3	9	0.943536
ENSMUSG00000048988	Elfn1	9	0.942867
ENSMUSG00000024245	Tmem178	9	0.942278
ENSMUSG00000053368	Rxfp2	9	0.936015
ENSMUSG00000007279	Scube2	9	0.930407
ENSMUSG00000102212	C230085N15Rik	9	0.927862
ENSMUSG00000020836	Coro6	9	0.926144
ENSMUSG00000035305	Ror1	9	0.925135
ENSMUSG00000051910	Sox6	9	0.9225
ENSMUSG00000093400	Gm20647	9	0.91766
ENSMUSG00000022054	Nefm	9	0.910505
ENSMUSG00000100484	Gm7133	9	0.908845
ENSMUSG00000093650	Gm20631	9	0.907408
ENSMUSG00000102516	Gm38340	9	0.907164
ENSMUSG00000047344	Lancl3	9	0.90695
ENSMUSG00000028977	Casz1	9	0.905867
ENSMUSG00000103882	Gm37452	9	0.904494
ENSMUSG00000073154	9330158H04Rik	9	0.904005
ENSMUSG00000085562	2610028E06Rik	9	0.903505
ENSMUSG00000073406	H2-Bl	9	0.901938
ENSMUSG00000102973	E430014B02Rik	9	0.900814
ENSMUSG00000039384	Dusp10	9	0.900552
ENSMUSG00000087621	1700003G18Rik	9	0.900486
ENSMUSG00000049796	Crh	10	0.992609
ENSMUSG00000019803	Nr2e1	10	0.990162
ENSMUSG00000019848	Popdc3	10	0.985405
ENSMUSG00000085743	8430419K02Rik	10	0.984126
ENSMUSG00000090088	Gm15934	10	0.979073
ENSMUSG00000092627	D130058E05Rik	10	0.9772
ENSMUSG00000091345	Col6a5	10	0.974749
ENSMUSG00000034555	Tex16	10	0.97315
ENSMUSG00000031364	Grpr	10	0.958102
ENSMUSG00000079460	4933403O08Rik	10	0.955369
ENSMUSG00000067081	Asb18	10	0.949835
ENSMUSG00000031212	Pgr15l	10	0.948483
ENSMUSG00000045404	Kcnk13	10	0.941931
ENSMUSG00000026872	Zeb2	10	0.936603
ENSMUSG00000051839	Gypa	10	0.930649
ENSMUSG00000019890	Nts	10	0.927173
ENSMUSG00000033327	Tnxb	10	0.924071
ENSMUSG00000062393	Dgkk	10	0.922961
ENSMUSG00000097927	Gm6999	10	0.91529
ENSMUSG00000020160	Meis1	10	0.911066
ENSMUSG00000042353	Frem3	10	0.906792
ENSMUSG00000026301	Iqca	10	0.904395
ENSMUSG00000075324	Fign	10	0.901376
ENSMUSG00000019936	Epyc	11	0.98415
ENSMUSG00000027400	Pdyn	11	0.983809
ENSMUSG00000097922		11	0.981543
ENSMUSG00000051617	Krt9	11	0.978665
ENSMUSG00000008845	Cd163	11	0.971829
ENSMUSG00000097652	Mhrt	11	0.969002
ENSMUSG00000085944	1700003D09Rik	11	0.967072
ENSMUSG00000030930	Chst15	11	0.965286
ENSMUSG00000032528	Vipr1	11	0.965184
ENSMUSG00000021108	Prkch	11	0.963136
ENSMUSG00000041771	Slc24a4	11	0.960463
ENSMUSG00000015568	Lpl	11	0.960036
ENSMUSG00000087296	Gm12130	11	0.959575
ENSMUSG00000030905	Crym	11	0.953221
ENSMUSG00000087388	Gm12128	11	0.949343
ENSMUSG00000059588	Calcrl	11	0.945084
ENSMUSG00000054555	Adam12	11	0.9446
ENSMUSG00000058260	Serpina9	11	0.94334
ENSMUSG00000033960	Jcad	11	0.943098
ENSMUSG00000032402	Smad3	11	0.931579
ENSMUSG00000021478	Drd1	11	0.931567
ENSMUSG00000039629	Strip2	11	0.93075
ENSMUSG00000061718	Ppp1r1b	11	0.925029
ENSMUSG00000017491	Rarb	11	0.923594
ENSMUSG00000020902	Ntn1	11	0.91989
ENSMUSG00000032343	Impg1	11	0.918255
ENSMUSG00000024176	Sox8	11	0.917793
ENSMUSG00000098501	Gm19272	11	0.917208
ENSMUSG00000057457	Phex	11	0.91524
ENSMUSG00000103305	Gm34068	11	0.913586
ENSMUSG00000043659	Npsr1	11	0.913471
ENSMUSG00000036446	Lum	11	0.911603
ENSMUSG00000001119	Col6a1	11	0.90815
ENSMUSG00000037679	Inf2	11	0.90674
ENSMUSG00000052374	Actn2	11	0.90637
ENSMUSG00000037148	Arhgap10	11	0.904637
ENSMUSG00000074575	Kcng1	11	0.90377
ENSMUSG00000026826	Nr4a2	12	0.998848
ENSMUSG00000021848	Otx2	12	0.990665
ENSMUSG00000084987	Gm13134	12	0.9886
ENSMUSG00000098682	Otx2os1	12	0.98657
ENSMUSG00000029671	Wnt16	12	0.98396
ENSMUSG00000039410	Prdm16	12	0.978957
ENSMUSG00000085427	6430710C18Rik	12	0.976102
ENSMUSG00000036103	Colec12	12	0.971788
ENSMUSG00000046500	Tafa4	12	0.970806
ENSMUSG00000074006	Omp	12	0.969067
ENSMUSG00000089636	1700058P15Rik	12	0.949816
ENSMUSG00000031075	Ano1	12	0.949605
ENSMUSG00000086565	Gm13133	12	0.949339
ENSMUSG00000030110	Ret	12	0.945584
ENSMUSG00000033722	BC034090	12	0.944251
ENSMUSG00000079466	Prdm12	12	0.938614
ENSMUSG00000040703	Cyp2s1	12	0.936491
ENSMUSG00000037610	Kcnmb2	12	0.935917
ENSMUSG00000026674	Ddr2	12	0.932798
ENSMUSG00000036466	Megf11	12	0.929072
ENSMUSG00000048747	E130114P18Rik	12	0.911869
ENSMUSG00000028565	Nfia	12	0.909458
ENSMUSG00000022103	Gfra2	12	0.907339
ENSMUSG00000035678	Tnfsf9	12	0.900366
ENSMUSG00000021318	Gli3	13	0.995453
ENSMUSG00000098758	7630403G23Rik	13	0.992396
ENSMUSG00000012819	Cdh23	13	0.991781
ENSMUSG00000040969	Arhgef38	13	0.985396
ENSMUSG00000033207	Mamdc2	13	0.978405
ENSMUSG00000068180	AY512915	13	0.976131
ENSMUSG00000093738	AI606473	13	0.971577
ENSMUSG00000035109	Shc4	13	0.970709
ENSMUSG00000095654	Plscr5	13	0.967819
ENSMUSG00000031283	Chrdl1	13	0.956988
ENSMUSG00000096225	Lhx8	13	0.952861
ENSMUSG00000097289		13	0.947547
ENSMUSG00000091586	Cyp4f17	13	0.937729
ENSMUSG00000087037	4930432L08Rik	13	0.936095
ENSMUSG00000025789	St8sia2	13	0.933616
ENSMUSG00000035948	Acss3	13	0.930234
ENSMUSG00000101741	Gm28055	13	0.929792
ENSMUSG00000075270	Pde11a	13	0.922458
ENSMUSG00000086353	Gm13481	13	0.92191
ENSMUSG00000000214	Th	13	0.921451
ENSMUSG00000021927	Hnrnpa1l2-ps2	13	0.916508
ENSMUSG00000028339	Col15a1	13	0.914816
ENSMUSG00000066197	Gpr139	13	0.911611
ENSMUSG00000087379	Gm13849	13	0.910292
ENSMUSG00000001014	Icam4	13	0.907481
ENSMUSG00000032724	Abtb2	13	0.905907
ENSMUSG00000066477	Gm16551	14	0.993762
ENSMUSG00000038331	Satb2	14	0.990202
ENSMUSG00000074274	D930028M14Rik	14	0.987024
ENSMUSG00000031727	Pmfbp1	14	0.976939
ENSMUSG00000032023	Jhy	14	0.973811
ENSMUSG00000087022	9130024F11Rik	14	0.965304
ENSMUSG00000036198	Arhgap36	14	0.957289
ENSMUSG00000043013	Onecut1	14	0.953425
ENSMUSG00000043003	Rasef	14	0.945892
ENSMUSG00000093662	Gm20649	14	0.945129
ENSMUSG00000022306	Zfpm2	14	0.944712
ENSMUSG00000061171	Slc38a11	14	0.93807
ENSMUSG00000079058	Adam34	14	0.930902
ENSMUSG00000086365	4930593C16Rik	14	0.929221
ENSMUSG00000020182	Ddc	14	0.924787
ENSMUSG00000040016	Ptger3	14	0.924562
ENSMUSG00000045991	Onecut2	14	0.906885
ENSMUSG00000086391	1700042O10Rik	14	0.906481
ENSMUSG00000025400	Tac2	15	0.998915
ENSMUSG00000095620	Csta2	15	0.987797
ENSMUSG00000019890	Nts	15	0.987461
ENSMUSG00000097364		15	0.98567
ENSMUSG00000021880	Rnase6	15	0.979576
ENSMUSG00000009734	Pou6f2	15	0.978787
ENSMUSG00000019768	Esr1	15	0.977506
ENSMUSG00000024907	Gal	15	0.967517
ENSMUSG00000078952	Lncenc1	15	0.967009
ENSMUSG00000099839	Gm29374	15	0.958011
ENSMUSG00000051361	6030498E09Rik	15	0.952709
ENSMUSG00000048686	Hmgb4	15	0.948517
ENSMUSG00000080058	Gm11175	15	0.948506
ENSMUSG00000028370	Pappa	15	0.946376
ENSMUSG00000036856	Wnt4	15	0.933487
ENSMUSG00000026247	Ecel1	15	0.931348
ENSMUSG00000090667	Mdfic2	15	0.925645
ENSMUSG00000034009	Rxfp1	15	0.921074
ENSMUSG00000032374	Plod2	15	0.920495
ENSMUSG00000020953	Coch	15	0.920481
ENSMUSG00000087179	5730471H19Rik	15	0.920377
ENSMUSG00000073910	Mob3b	15	0.919767
ENSMUSG00000046593	Tmem215	15	0.919118
ENSMUSG00000048218	Amigo2	15	0.912395
ENSMUSG00000066755	Tnfsf18	15	0.902499
ENSMUSG00000062980	Cped1	15	0.901629
ENSMUSG00000091519	Skor2	16	0.999273
ENSMUSG00000024227	Pdzph1	16	0.99258
ENSMUSG00000028262	Clca3a2	16	0.99104
ENSMUSG00000017817	Jph2	16	0.98455
ENSMUSG00000036907	C1ql2	16	0.983888
ENSMUSG00000033327	Tnxb	16	0.97888
ENSMUSG00000046167	Gldn	16	0.974429
ENSMUSG00000032446	Eomes	16	0.974333
ENSMUSG00000074343	Gldnos	16	0.960733
ENSMUSG00000047259	Mc4r	16	0.958389
ENSMUSG00000098040	Gm20757	16	0.95776
ENSMUSG00000056973	Ces1d	16	0.954247
ENSMUSG00000032334	Loxl1	16	0.952253
ENSMUSG00000028197	Col24a1	16	0.95088
ENSMUSG00000040148	Hmx3	16	0.946454
ENSMUSG00000023964	Calcr	16	0.943576
ENSMUSG00000056025	Clca3a1	16	0.931962
ENSMUSG00000098649	Gm27199	16	0.922189
ENSMUSG00000023886	Smoc2	16	0.916261
ENSMUSG00000042498	Radx	16	0.911906
ENSMUSG00000057439	Kir3dl2	16	0.911689
ENSMUSG00000070644	Etnk2	16	0.911357
ENSMUSG00000021750	Fam107a	16	0.905961
ENSMUSG00000085749	Gm12843	16	0.902775
ENSMUSG00000033327	Tnxb	17	0.990618
ENSMUSG00000026389	Steap3	17	0.990304
ENSMUSG00000028370	Pappa	17	0.987644
ENSMUSG00000019768	Esr1	17	0.979824
ENSMUSG00000104264	Gm18529	17	0.973474
ENSMUSG00000031130	Brs3	17	0.969076
ENSMUSG00000019772	Vip	17	0.967808
ENSMUSG00000031255	Sytl4	17	0.965729
ENSMUSG00000021567	Nkd2	17	0.953666
ENSMUSG00000033149	Phldb2	17	0.952279
ENSMUSG00000028262	Clca3a2	17	0.950834
ENSMUSG00000054667	Irs4	17	0.950719
ENSMUSG00000031870	Pgr	17	0.950024
ENSMUSG00000084118	Gm14989	17	0.947383
ENSMUSG00000063450	Syne2	17	0.945634
ENSMUSG00000095620	Csta2	17	0.943355
ENSMUSG00000051860	Samd7	17	0.942367
ENSMUSG00000055435	Maf	17	0.942097
ENSMUSG00000024043	Arhgap28	17	0.941401
ENSMUSG00000023964	Calcr	17	0.934848
ENSMUSG00000038011	Dnah10	17	0.923839
ENSMUSG00000086460	Gm12236	17	0.918243
ENSMUSG00000019899	Lama2	17	0.915312
ENSMUSG00000000263	Glra1	17	0.915211
ENSMUSG00000074274	D930028M14Rik	17	0.913699
ENSMUSG00000098429	Gm27226	17	0.912871
ENSMUSG00000040624	Plekhg1	17	0.901984
ENSMUSG00000063704	Mapk15	17	0.90196
ENSMUSG00000019935	Slc17a8	18	0.998716
ENSMUSG00000036109	Mbnl3	18	0.9818
ENSMUSG00000069171	Nr2f1	18	0.981156
ENSMUSG00000087143	A830082K12Rik	18	0.952968
ENSMUSG00000039676	Capsl	18	0.948264
ENSMUSG00000056215	Lrguk	18	0.94637
ENSMUSG00000025592	Dach2	18	0.943459
ENSMUSG00000021765	Fst	18	0.93975
ENSMUSG00000017767	Spata25	18	0.926123
ENSMUSG00000027568	Ntsr1	18	0.923269
ENSMUSG00000046215	Rprml	18	0.923083
ENSMUSG00000070643	Sox13	18	0.919368
ENSMUSG00000026315	Serpinb8	18	0.914618
ENSMUSG00000019892	Lrriq1	18	0.914239
ENSMUSG00000058620	Adra2b	18	0.909609
ENSMUSG00000045509	Gpr150	18	0.908856
ENSMUSG00000085007	Smim43	18	0.905322
ENSMUSG00000100168	Gm28526	19	0.997896
ENSMUSG00000085564	Gm12198	19	0.99446
ENSMUSG00000053368	Rxfp2	19	0.989289
ENSMUSG00000061171	Slc38a11	19	0.989185
ENSMUSG00000027931	Npr1	19	0.985893
ENSMUSG00000043972	Opn5	19	0.98517
ENSMUSG00000056973	Ces1d	19	0.983767
ENSMUSG00000036545	Adamts2	19	0.981055
ENSMUSG00000051354	Samd3	19	0.976425
ENSMUSG00000049115	Agtr1a	19	0.973819
ENSMUSG00000086321	Gm11413	19	0.971076
ENSMUSG00000059816	Shisal2a	19	0.970833
ENSMUSG00000079502	Cfap77	19	0.963558
ENSMUSG00000031789	Cngb1	19	0.961139
ENSMUSG00000032702	Kank1	19	0.959606
ENSMUSG00000085510	Mir217hg	19	0.959
ENSMUSG00000087211	Lhx1os	19	0.958834
ENSMUSG00000017756	Slc12a7	19	0.956091
ENSMUSG00000093662	Gm20649	19	0.953671
ENSMUSG00000039109	F13a1	19	0.953648
ENSMUSG00000045532	C1ql1	19	0.947939
ENSMUSG00000045518	Onecut3	19	0.947119
ENSMUSG00000043969	Emx2	19	0.933466
ENSMUSG00000019230	Lhx9	19	0.933224
ENSMUSG00000040016	Ptger3	19	0.931999
ENSMUSG00000085533	Gm12146	19	0.931619
ENSMUSG00000032034	Kcnj5	19	0.929539
ENSMUSG00000098682	Otx2os1	19	0.92881
ENSMUSG00000086758	Gm13912	19	0.928519
ENSMUSG00000018698	Lhx1	19	0.927896
ENSMUSG00000023064	Sncg	19	0.927584
ENSMUSG00000031727	Pmfbp1	19	0.927187
ENSMUSG00000021743	Fezf2	19	0.926195
ENSMUSG00000034151	Zbbx	19	0.925697
ENSMUSG00000026114	Cnga3	19	0.919071
ENSMUSG00000036198	Arhgap36	19	0.918651
ENSMUSG00000099512	Gm28703	19	0.917809
ENSMUSG00000090226	Gm16110	19	0.912847
ENSMUSG00000019880	Rspo3	19	0.905663
ENSMUSG00000099207	Gm10637	19	0.901207
ENSMUSG00000040258	Nxph4	19	0.900442
ENSMUSG00000049314	Fbxw13	20	0.998658
ENSMUSG00000040298	Btbd16	20	0.99176
ENSMUSG00000026826	Nr4a2	20	0.989721
ENSMUSG00000031255	Sytl4	20	0.988782
ENSMUSG00000000805	Car4	20	0.975805
ENSMUSG00000052430	Bmpr1b	20	0.973222
ENSMUSG00000072791	Abcb5	20	0.972328
ENSMUSG00000031119	Gpc4	20	0.969035
ENSMUSG00000015647	Lama5	20	0.968907
ENSMUSG00000101537	Gm29571	20	0.962421
ENSMUSG00000021879	Dnah12	20	0.959066
ENSMUSG00000036109	Mbnl3	20	0.948799
ENSMUSG00000036198	Arhgap36	20	0.944577
ENSMUSG00000057439	Kir3dl2	20	0.936871
ENSMUSG00000034330	Plcg2	20	0.936143
ENSMUSG00000038668	Lpar1	20	0.924533
ENSMUSG00000027318	Adam33	20	0.923731
ENSMUSG00000085640	Gm14064	20	0.918464
ENSMUSG00000047642	D930020B18Rik	20	0.917487
ENSMUSG00000034555	Tex16	20	0.912384
ENSMUSG00000087022	9130024F11Rik	20	0.910727
ENSMUSG00000031340	Gabre	20	0.906842
ENSMUSG00000101559	Gm28258	20	0.901323
ENSMUSG00000085222	Gm13974	21	0.997143
ENSMUSG00000101448	Gm28494	21	0.993165
ENSMUSG00000042717	Ppp1r3a	21	0.982563
ENSMUSG00000041390	Mdfic	21	0.98241
ENSMUSG00000019936	Epyc	21	0.979168
ENSMUSG00000091996	BC049352	21	0.974014
ENSMUSG00000079183	C030005K15Rik	21	0.966834
ENSMUSG00000021367	Edn1	21	0.966387
ENSMUSG00000046402	Rbp1	21	0.965477
ENSMUSG00000087029	Gm14133	21	0.963762
ENSMUSG00000027803	Wwtr1	21	0.958361
ENSMUSG00000032528	Vipr1	21	0.957699
ENSMUSG00000052133	Sema5b	21	0.95571
ENSMUSG00000015843	Rxrg	21	0.954043
ENSMUSG00000098097	6530403H02Rik	21	0.952361
ENSMUSG00000001119	Col6a1	21	0.951574
ENSMUSG00000068117	Mei1	21	0.945171
ENSMUSG00000056586	Zar1l	21	0.944237
ENSMUSG00000031382	Asb11	21	0.944223
ENSMUSG00000022237	Ankrd33b	21	0.941825
ENSMUSG00000032327	Stra6	21	0.941523
ENSMUSG00000046982	Tshz1	21	0.939123
ENSMUSG00000061718	Ppp1r1b	21	0.938346
ENSMUSG00000032091	Tmprss4	21	0.936844
ENSMUSG00000085944	1700003D09Rik	21	0.936516
ENSMUSG00000037679	Inf2	21	0.934417
ENSMUSG00000064128	Cenpj	21	0.934316
ENSMUSG00000033007	Asic4	21	0.928731
ENSMUSG00000097922		21	0.920573
ENSMUSG00000062319	Gm10115	21	0.919629
ENSMUSG00000029217	Tec	21	0.918874
ENSMUSG00000036144	Meox2	21	0.916923
ENSMUSG00000039629	Strip2	21	0.913068
ENSMUSG00000063531	Sema3e	21	0.912599
ENSMUSG00000036446	Lum	21	0.911465
ENSMUSG00000046027	Stard5	21	0.908878
ENSMUSG00000056023	Gm9989	21	0.904586
ENSMUSG00000029999	Tgfa	21	0.904281
ENSMUSG00000089710	Gm15810	21	0.90093
ENSMUSG00000062391	4932435O22Rik	22	0.995014
ENSMUSG00000025993	Slc40a1	22	0.987142
ENSMUSG00000048332	Lhfp	22	0.97643
ENSMUSG00000065875		22	0.971651
ENSMUSG00000020614	Fam20a	22	0.967469
ENSMUSG00000051920	Rspo2	22	0.966553
ENSMUSG00000036528	Ppfibp2	22	0.96352
ENSMUSG00000055099		22	0.957439
ENSMUSG00000085940	4930405D11Rik	22	0.952593
ENSMUSG00000050447	Lypd6	22	0.952413
ENSMUSG00000094627	Gm10182	22	0.951312
ENSMUSG00000090176	Cd200r2	22	0.950524
ENSMUSG00000097462	9530026P05Rik	22	0.94776
ENSMUSG00000087989		22	0.943924
ENSMUSG00000090125	Pou3f1	22	0.934712
ENSMUSG00000002633	Shh	22	0.934458
ENSMUSG00000022687	Boc	22	0.933519
ENSMUSG00000085024	C230035I16Rik	22	0.931112
ENSMUSG00000085842	Pard3bos1	22	0.929559
ENSMUSG00000093738	AI606473	22	0.929372
ENSMUSG00000098172	Gm26973	22	0.927538
ENSMUSG00000024155	Meiob	22	0.927532
ENSMUSG00000096225	Lhx8	22	0.926516
ENSMUSG00000085400	Pard3bos3	22	0.925838
ENSMUSG00000024043	Arhgap28	22	0.923499
ENSMUSG00000098760	Gm2164	22	0.916363
ENSMUSG00000035580	Kcnh8	22	0.913896
ENSMUSG00000029917	Qrfprl	22	0.907088
ENSMUSG00000031075	Ano1	22	0.903625
ENSMUSG00000026765	Lypd6b	22	0.902723
ENSMUSG00000029123	Stk32b	22	0.901828
ENSMUSG00000099207	Gm10637	23	0.993647
ENSMUSG00000086620	Rspo4os	23	0.991354
ENSMUSG00000019913	Sim1	23	0.986921
ENSMUSG00000078640	Gm11627	23	0.986867
ENSMUSG00000062713	Sim2	23	0.985528
ENSMUSG00000021685	Otp	23	0.983733
ENSMUSG00000005892	Trh	23	0.981232
ENSMUSG00000049115	Agtr1a	23	0.981077
ENSMUSG00000098086	1700120C18Rik	23	0.977774
ENSMUSG00000100301	6030407O03Rik	23	0.973173
ENSMUSG00000020052	Ascl1	23	0.973071
ENSMUSG00000084966	2810471M01Rik	23	0.969766
ENSMUSG00000024256	Adcyap1	23	0.963502
ENSMUSG00000100168	Gm28526	23	0.962873
ENSMUSG00000021743	Fezf2	23	0.958444
ENSMUSG00000035456	Prdm8	23	0.956275
ENSMUSG00000085510	Mir217hg	23	0.955882
ENSMUSG00000031654	Cbln1	23	0.953742
ENSMUSG00000027695	Pld1	23	0.943287
ENSMUSG00000029546	Uncx	23	0.941182
ENSMUSG00000024565	Sall3	23	0.933304
ENSMUSG00000022309	Angpt1	23	0.932214
ENSMUSG00000064325	Hhip	23	0.928969
ENSMUSG00000057098	Ebf1	23	0.924675
ENSMUSG00000023964	Calcr	23	0.921059
ENSMUSG00000097364		23	0.91879
ENSMUSG00000091345	Col6a5	23	0.912711
ENSMUSG00000034810	Scn7a	23	0.900373
ENSMUSG00000086029	Pax6os1	24	0.997837
ENSMUSG00000100303	2600014E21Rik	24	0.996543
ENSMUSG00000027168	Pax6	24	0.993079
ENSMUSG00000098720	Gm27239	24	0.981441
ENSMUSG00000010461	Eya4	24	0.980549
ENSMUSG00000020651	Slc26a4	24	0.976061
ENSMUSG00000074981	Dcdc5	24	0.969646
ENSMUSG00000097648	9330185C12Rik	24	0.967772
ENSMUSG00000024565	Sall3	24	0.960324
ENSMUSG00000079466	Prdm12	24	0.959132
ENSMUSG00000064294	Aox3	24	0.958476
ENSMUSG00000029189	Sel1l3	24	0.937185
ENSMUSG00000021948	Prkcd	24	0.934061
ENSMUSG00000021927	Hnrnpa1l2-ps2	24	0.925853
ENSMUSG00000037370	Enpp1	24	0.922121
ENSMUSG00000021221	Dpf3	24	0.914584
ENSMUSG00000021680	Crhbp	24	0.911681
ENSMUSG00000006462	A530013C23Rik	24	0.911506
ENSMUSG00000040280	Ndufa4l2	24	0.909239
ENSMUSG00000064080	Fbln2	24	0.906641
ENSMUSG00000103748	Gm38243	24	0.900474
ENSMUSG00000081362	Cyp2j7	25	0.997027
ENSMUSG00000079465	Col4a3	25	0.986754
ENSMUSG00000050100	Hmx2	25	0.986133
ENSMUSG00000090231	Cfb	25	0.983736
ENSMUSG00000040148	Hmx3	25	0.983012
ENSMUSG00000002020	Ltbp2	25	0.982747
ENSMUSG00000087401	Gm14664	25	0.980276
ENSMUSG00000036169	Sostdc1	25	0.976105
ENSMUSG00000072573	Gm10369	25	0.972404
ENSMUSG00000048218	Amigo2	25	0.960399
ENSMUSG00000049630	C1ql3	25	0.959239
ENSMUSG00000092545	Gm20319	25	0.95508
ENSMUSG00000021318	Gli3	25	0.954576
ENSMUSG00000034009	Rxfp1	25	0.948896
ENSMUSG00000066197	Gpr139	25	0.94812
ENSMUSG00000099839	Gm29374	25	0.944833
ENSMUSG00000024521	Pmaip1	25	0.943798
ENSMUSG00000024907	Gal	25	0.942807
ENSMUSG00000045731	Pnoc	25	0.942597
ENSMUSG00000067158	Col4a4	25	0.940416
ENSMUSG00000017756	Slc12a7	25	0.934052
ENSMUSG00000069441	Dsg1a	25	0.932541
ENSMUSG00000030110	Ret	25	0.932132
ENSMUSG00000101348	Gm7135	25	0.929094
ENSMUSG00000073152	Gm10475	25	0.924947
ENSMUSG00000030157	Clec2d	25	0.924852
ENSMUSG00000026247	Ecel1	25	0.922046
ENSMUSG00000095620	Csta2	25	0.921909
ENSMUSG00000039384	Dusp10	25	0.908006
ENSMUSG00000031119	Gpc4	25	0.907106
ENSMUSG00000031727	Pmfbp1	26	0.994295
ENSMUSG00000043013	Onecut1	26	0.993746
ENSMUSG00000014030	Pax5	26	0.989792
ENSMUSG00000066477	Gm16551	26	0.98709
ENSMUSG00000093662	Gm20649	26	0.985564
ENSMUSG00000008999	Bmp7	26	0.985158
ENSMUSG00000015484	Fam163a	26	0.979467
ENSMUSG00000098682	Otx2os1	26	0.977851
ENSMUSG00000085510	Mir217hg	26	0.974937
ENSMUSG00000102483	Catspere1	26	0.974009
ENSMUSG00000063953	Amd2	26	0.967415
ENSMUSG00000045991	Onecut2	26	0.961533
ENSMUSG00000016087	Fli1	26	0.958817
ENSMUSG00000034810	Scn7a	26	0.958302
ENSMUSG00000030235	Slco1c1	26	0.95757
ENSMUSG00000037188	Grhl3	26	0.948602
ENSMUSG00000023064	Sncg	26	0.946155
ENSMUSG00000021848	Otx2	26	0.94582
ENSMUSG00000045532	C1ql1	26	0.938126
ENSMUSG00000020467	Efemp1	26	0.936255
ENSMUSG00000068674	Gm10247	26	0.934831
ENSMUSG00000035873	Pawr	26	0.923467
ENSMUSG00000021099	Six6	26	0.917152
ENSMUSG00000064052	Gm5089	26	0.903096
ENSMUSG00000069132	Nxph2	27	0.994368
ENSMUSG00000031548	Sfrp1	27	0.982994
ENSMUSG00000029819	Npy	27	0.981715
ENSMUSG00000004366	Sst	27	0.980433
ENSMUSG00000087467	Gm13601	27	0.978917
ENSMUSG00000020963	Tshr	27	0.978253
ENSMUSG00000020000	Moxd1	27	0.97675
ENSMUSG00000100001	1810007D17Rik	27	0.972165
ENSMUSG00000039116	Adgrg6	27	0.970696
ENSMUSG00000024043	Arhgap28	27	0.966369
ENSMUSG00000102600	Gm37266	27	0.960287
ENSMUSG00000103358	Gm37593	27	0.956574
ENSMUSG00000022887	Masp1	27	0.95533
ENSMUSG00000064325	Hhip	27	0.95338
ENSMUSG00000050447	Lypd6	27	0.95299
ENSMUSG00000030093	Wnt7a	27	0.940974
ENSMUSG00000051910	Sox6	27	0.938792
ENSMUSG00000026765	Lypd6b	27	0.936694
ENSMUSG00000041565	L3mbtl4	27	0.934953
ENSMUSG00000023927	Satb1	27	0.932332
ENSMUSG00000102744	5830444F18Rik	27	0.923709
ENSMUSG00000027188	Pamr1	27	0.912541
ENSMUSG00000097917	Gm26839	27	0.911261
ENSMUSG00000058542	Gm15590	27	0.909178
ENSMUSG00000038168	P3h2	27	0.908388
ENSMUSG00000001496	Nkx2-1	27	0.907871
ENSMUSG00000016087	Fli1	27	0.907494
ENSMUSG00000102973	E430014B02Rik	27	0.904643
ENSMUSG00000026890	Lhx6	27	0.900725
ENSMUSG00000000402	Egfl6	27	0.900403
ENSMUSG00000001119	Col6a1	28	0.989174
ENSMUSG00000097758		28	0.988435
ENSMUSG00000020573	Pik3cg	28	0.988348
ENSMUSG00000021108	Prkch	28	0.982961
ENSMUSG00000030905	Crym	28	0.97737
ENSMUSG00000045509	Gpr150	28	0.974073
ENSMUSG00000074555	Gm10714	28	0.97343
ENSMUSG00000017754	Pltp	28	0.973022
ENSMUSG00000085640	Gm14064	28	0.968235
ENSMUSG00000038115	Ano2	28	0.952842
ENSMUSG00000097922		28	0.945867
ENSMUSG00000021990	Spata13	28	0.941786
ENSMUSG00000033182	Kbtbd12	28	0.940771
ENSMUSG00000097466	D430036J16Rik	28	0.938073
ENSMUSG00000061533	Cep128	28	0.937199
ENSMUSG00000005148	Klf5	28	0.935015
ENSMUSG00000044350	Lacc1	28	0.927855
ENSMUSG00000104304	Gm36974	28	0.9203
ENSMUSG00000037148	Arhgap10	28	0.919213
ENSMUSG00000039004	Bmp6	28	0.916137
ENSMUSG00000025279	Dnase1l3	28	0.914534
ENSMUSG00000061718	Ppp1r1b	28	0.911005
ENSMUSG00000022863	Btg3	28	0.908723
ENSMUSG00000038760	Trhr	28	0.902169
ENSMUSG00000030353	Tead4	29	0.995112
ENSMUSG00000086876	Gm12828	29	0.993277
ENSMUSG00000029322	Plac8	29	0.989458
ENSMUSG00000027833	Shox2	29	0.984908
ENSMUSG00000092627	D130058E05Rik	29	0.979953
ENSMUSG00000019230	Lhx9	29	0.977089
ENSMUSG00000059434	Gckr	29	0.975623
ENSMUSG00000058743	Kcnj14	29	0.974537
ENSMUSG00000029659	Medag	29	0.97446
ENSMUSG00000095105	Edaradd	29	0.971662
ENSMUSG00000040605	Bace2	29	0.968315
ENSMUSG00000099364	5730419F03Rik	29	0.961684
ENSMUSG00000083317	Gm14402	29	0.961348
ENSMUSG00000050558	Prokr2	29	0.959287
ENSMUSG00000013611	Snx31	29	0.958757
ENSMUSG00000099404	Gm28172	29	0.958472
ENSMUSG00000026327	Serpinb11	29	0.958304
ENSMUSG00000034486	Gbx2	29	0.958273
ENSMUSG00000024985	Tcf7l2	29	0.958113
ENSMUSG00000092327		29	0.957803
ENSMUSG00000010175	Prox1	29	0.95543
ENSMUSG00000022431	Ribc2	29	0.954837
ENSMUSG00000073063	Hbq1b	29	0.954237
ENSMUSG00000038331	Satb2	29	0.954085
ENSMUSG00000030491	Tdrd12	29	0.952958
ENSMUSG00000097525	Platr31	29	0.952765
ENSMUSG00000020633	Dcdc2c	29	0.949295
ENSMUSG00000100157	2310034O05Rik	29	0.949043
ENSMUSG00000000386	Mx1	29	0.947744
ENSMUSG00000027947	Il6ra	29	0.94758
ENSMUSG00000101411	Gm28111	29	0.945131
ENSMUSG00000050315	Synpo2	29	0.943742
ENSMUSG00000005640	Insrr	29	0.940133
ENSMUSG00000023885	Thbs2	29	0.939501
ENSMUSG00000041046	Ramp3	29	0.937483
ENSMUSG00000073929	Trim30e-ps1	29	0.936946
ENSMUSG00000098358	Gm27164	29	0.936456
ENSMUSG00000029151	Slc30a3	29	0.935299
ENSMUSG00000041120	Nbl1	29	0.93493
ENSMUSG00000045871	Slitrk6	29	0.933905
ENSMUSG00000027985	Lef1	29	0.932941
ENSMUSG00000052942	Glis3	29	0.93149
ENSMUSG00000026866	Kynu	29	0.925355
ENSMUSG00000087022	9130024F11Rik	29	0.924316
ENSMUSG00000049630	C1ql3	29	0.92012
ENSMUSG00000020614	Fam20a	29	0.9199
ENSMUSG00000064052	Gm5089	29	0.919072
ENSMUSG00000079045	Prox1os	29	0.918947
ENSMUSG00000037946	Fgd3	29	0.918205
ENSMUSG00000020846	Rflnb	29	0.916461
ENSMUSG00000040147	Maob	29	0.913944
ENSMUSG00000032220	Myo1e	29	0.906785
ENSMUSG00000000247	Lhx2	29	0.904802
ENSMUSG00000019865	Nmbr	29	0.901376
ENSMUSG00000019803	Nr2e1	30	0.99487
ENSMUSG00000046500	Tafa4	30	0.994614
ENSMUSG00000064792	Gm24355	30	0.993353
ENSMUSG00000025090	Ccdc172	30	0.991978
ENSMUSG00000051650	B3gnt2	30	0.981784
ENSMUSG00000062391	4932435O22Rik	30	0.975136
ENSMUSG00000090732	4930579O11Rik	30	0.966137
ENSMUSG00000051839	Gypa	30	0.965338
ENSMUSG00000026890	Lhx6	30	0.948695
ENSMUSG00000068196	Col8a1	30	0.947217
ENSMUSG00000073103	Gm10466	30	0.946891
ENSMUSG00000022144	Gdnf	30	0.944319
ENSMUSG00000087618	Gm14114	30	0.93365
ENSMUSG00000096163		30	0.929438
ENSMUSG00000026894	Morn5	30	0.928701
ENSMUSG00000024421	Lama3	30	0.926211
ENSMUSG00000043659	Npsr1	30	0.926107
ENSMUSG00000069132	Nxph2	30	0.924335
ENSMUSG00000100001	1810007D17Rik	30	0.921805
ENSMUSG00000020140	Lgr5	30	0.918312
ENSMUSG00000046318	Ccbe1	30	0.91733
ENSMUSG00000086904	Gm13404	30	0.916246
ENSMUSG00000067724	Gbx1	30	0.911641
ENSMUSG00000086758	Gm13912	30	0.910402
ENSMUSG00000024593	Megf10	30	0.903332
ENSMUSG00000026301	Iqca	30	0.901946
ENSMUSG00000087145	Gm12665	30	0.900817
ENSMUSG00000031103	Elf4	31	0.995417
ENSMUSG00000085162	Gm12295	31	0.994251
ENSMUSG00000070330	Tmem235	31	0.992376
ENSMUSG00000043969	Emx2	31	0.991338
ENSMUSG00000044988	Ucn3	31	0.989077
ENSMUSG00000087095	Emx2os	31	0.984442
ENSMUSG00000042498	Radx	31	0.983324
ENSMUSG00000072244	Trim6	31	0.9792
ENSMUSG00000043719	Col6a6	31	0.972461
ENSMUSG00000096918	Gm16863	31	0.968369
ENSMUSG00000100168	Gm28526	31	0.96578
ENSMUSG00000048482	Bdnf	31	0.964992
ENSMUSG00000040258	Nxph4	31	0.964372
ENSMUSG00000002147	Stat6	31	0.961997
ENSMUSG00000035678	Tnfsf9	31	0.957217
ENSMUSG00000042349	Ikbke	31	0.95179
ENSMUSG00000086864		31	0.950735
ENSMUSG00000022887	Masp1	31	0.94615
ENSMUSG00000071033	Gm10308	31	0.943789
ENSMUSG00000031340	Gabre	31	0.942608
ENSMUSG00000032577	Mapkapk3	31	0.936626
ENSMUSG00000024647	Cbln2	31	0.932626
ENSMUSG00000022419	Deptor	31	0.929459
ENSMUSG00000054072	Iigp1	31	0.927218
ENSMUSG00000051354	Samd3	31	0.923491
ENSMUSG00000091154	Proscos	31	0.922607
ENSMUSG00000031303	Map3k15	31	0.918229
ENSMUSG00000043972	Opn5	31	0.916118
ENSMUSG00000007041	Clic1	31	0.909265
ENSMUSG00000036357	Gpr101	31	0.907359
ENSMUSG00000032334	Loxl1	31	0.906903
ENSMUSG00000029595	Lhx5	31	0.906572
ENSMUSG00000039774	Galnt12	31	0.901404
ENSMUSG00000000214	Th	32	0.997295
ENSMUSG00000031880	Rrad	32	0.996851
ENSMUSG00000027611	Procr	32	0.993075
ENSMUSG00000058427	Cxcl2	32	0.990712
ENSMUSG00000037411	Serpine1	32	0.987108
ENSMUSG00000101969	Gm20125	32	0.984742
ENSMUSG00000039529	Atp8b1	32	0.979867
ENSMUSG00000022893	Adamts1	32	0.979357
ENSMUSG00000021250	Fos	32	0.979343
ENSMUSG00000021509	Slc25a48	32	0.97615
ENSMUSG00000028214	Gem	32	0.970087
ENSMUSG00000099839	Gm29374	32	0.966728
ENSMUSG00000003545	Fosb	32	0.96406
ENSMUSG00000024907	Gal	32	0.957445
ENSMUSG00000032265	Tent5a	32	0.956078
ENSMUSG00000027803	Wwtr1	32	0.95393
ENSMUSG00000049892	Rasd1	32	0.952104
ENSMUSG00000074766	Ism1	32	0.945595
ENSMUSG00000085609	1700016P03Rik	32	0.944074
ENSMUSG00000026628	Atf3	32	0.941323
ENSMUSG00000097717	1700066J03Rik	32	0.933722
ENSMUSG00000031119	Gpc4	32	0.931867
ENSMUSG00000024757	Slc22a19	32	0.927999
ENSMUSG00000024553	Galr1	32	0.92569
ENSMUSG00000023067	Cdkn1a	32	0.91857
ENSMUSG00000020423	Btg2	32	0.910554
ENSMUSG00000099404	Gm28172	32	0.90911
ENSMUSG00000034275	Igsf9b	32	0.908793
ENSMUSG00000041012	Cmtm8	32	0.908247
ENSMUSG00000023367	Tmem176a	32	0.905735
ENSMUSG00000036144	Meox2	32	0.900615
ENSMUSG00000020122	Egfr	33	0.995503
ENSMUSG00000024697	Gna14	33	0.994873
ENSMUSG00000085091	Egfros	33	0.994476
ENSMUSG00000022894	Adamts5	33	0.990964
ENSMUSG00000017493	Igfbp4	33	0.989016
ENSMUSG00000020000	Moxd1	33	0.984213
ENSMUSG00000055435	Maf	33	0.98146
ENSMUSG00000030717	Nupr1	33	0.980695
ENSMUSG00000096537	Fam240b	33	0.975534
ENSMUSG00000037944	Ccr7	33	0.975218
ENSMUSG00000020067	Mypn	33	0.971485
ENSMUSG00000027859	Ngf	33	0.969098
ENSMUSG00000074622	Mafb	33	0.968092
ENSMUSG00000083611	Gm8832	33	0.966143
ENSMUSG00000048776	Pthlh	33	0.965381
ENSMUSG00000055612	Cdca7	33	0.957871
ENSMUSG00000043673	Kcns3	33	0.951163
ENSMUSG00000005672	Kit	33	0.948675
ENSMUSG00000090066	1110002E22Rik	33	0.94839
ENSMUSG00000032269	Htr3a	33	0.947649
ENSMUSG00000026141	Col19a1	33	0.939401
ENSMUSG00000092210	A930009A15Rik	33	0.931956
ENSMUSG00000080468	Mir1195	33	0.930948
ENSMUSG00000030785	Cox6a2	33	0.930267
ENSMUSG00000021253	Tgfb3	33	0.925542
ENSMUSG00000004151	Etv1	33	0.922476
ENSMUSG00000025795	Rassf3	33	0.914966
ENSMUSG00000103642	Gm37769	33	0.911317
ENSMUSG00000033740	St18	33	0.910592
ENSMUSG00000073910	Mob3b	33	0.907866
ENSMUSG00000027995	Tlr2	33	0.90732
ENSMUSG00000026872	Zeb2	33	0.907286
ENSMUSG00000029338	Antxr2	33	0.904495
ENSMUSG00000064294	Aox3	33	0.901427
ENSMUSG00000041741	Pde3a	33	0.901367
ENSMUSG00000000392	Fap	34	0.997275
ENSMUSG00000100589	4930533P14Rik	34	0.996983
ENSMUSG00000087518	Gm13561	34	0.989801
ENSMUSG00000086964	Gm15948	34	0.981248
ENSMUSG00000021457	Syk	34	0.977456
ENSMUSG00000041731	Pgm5	34	0.968409
ENSMUSG00000016763	Scube1	34	0.9642
ENSMUSG00000048562	Sp8	34	0.951436
ENSMUSG00000020090	Npffr1	34	0.947323
ENSMUSG00000045382	Cxcr4	34	0.946561
ENSMUSG00000012819	Cdh23	34	0.946425
ENSMUSG00000025946	Pth2r	34	0.933409
ENSMUSG00000086670	Gm13194	34	0.932368
ENSMUSG00000086810	Gm13110	34	0.931949
ENSMUSG00000035000	Dpp4	34	0.927475
ENSMUSG00000006270	Vax1	34	0.922871
ENSMUSG00000036560	Lgi4	34	0.919515
ENSMUSG00000029151	Slc30a3	34	0.916147
ENSMUSG00000020806	Rhbdf2	34	0.912659
ENSMUSG00000102029	Gm29530	34	0.91232
ENSMUSG00000042607	Asb4	34	0.904865
ENSMUSG00000025348	Itga7	34	0.902246
ENSMUSG00000028487	Bnc2	35	1
ENSMUSG00000085784	Gm12158	35	0.984976
ENSMUSG00000057098	Ebf1	35	0.984964
ENSMUSG00000032006	Pdgfd	35	0.983243
ENSMUSG00000067616	Klk11	35	0.981692
ENSMUSG00000035916	Ptprq	35	0.970017
ENSMUSG00000086904	Gm13404	35	0.965286
ENSMUSG00000067101	1700010H22Rik	35	0.94426
ENSMUSG00000030617	Ccdc83	35	0.932988
ENSMUSG00000028589	1700012P22Rik	35	0.931685
ENSMUSG00000027792	Bche	35	0.925638
ENSMUSG00000025592	Dach2	35	0.925464
ENSMUSG00000087388	Gm12128	35	0.918792
ENSMUSG00000028273	Pdlim5	35	0.91808
ENSMUSG00000102564	Gm37035	35	0.912318
ENSMUSG00000048776	Pthlh	35	0.906458
ENSMUSG00000021919	Chat	36	0.993766
ENSMUSG00000097794	Gm2990	36	0.992752
ENSMUSG00000078935	1700025C18Rik	36	0.992708
ENSMUSG00000028072	Ntrk1	36	0.990546
ENSMUSG00000028073	Pear1	36	0.987503
ENSMUSG00000000120	Ngfr	36	0.987004
ENSMUSG00000005640	Insrr	36	0.984865
ENSMUSG00000094230	Gm21847	36	0.98182
ENSMUSG00000005397	Nid1	36	0.981293
ENSMUSG00000041669	Prima1	36	0.976695
ENSMUSG00000023945	Slc5a7	36	0.976411
ENSMUSG00000081849	Zar1-ps	36	0.975565
ENSMUSG00000100241	Slc18a3	36	0.972313
ENSMUSG00000028259	Fhl5	36	0.968715
ENSMUSG00000029219	Slc10a4	36	0.968204
ENSMUSG00000026315	Serpinb8	36	0.96695
ENSMUSG00000022026	Olfm4	36	0.966884
ENSMUSG00000081741	Gm14106	36	0.966328
ENSMUSG00000099747	1700025K24Rik	36	0.965518
ENSMUSG00000056492	Adgrf5	36	0.962773
ENSMUSG00000047638	Nr1h4	36	0.961704
ENSMUSG00000085301	Gm12132	36	0.959989
ENSMUSG00000099839	Gm29374	36	0.957663
ENSMUSG00000019848	Popdc3	36	0.957562
ENSMUSG00000102046	2810404M03Rik	36	0.957487
ENSMUSG00000004951	Hspb1	36	0.952845
ENSMUSG00000087172	Gm12153	36	0.951659
ENSMUSG00000098875	Gm27211	36	0.951453
ENSMUSG00000069441	Dsg1a	36	0.947735
ENSMUSG00000096675		36	0.945728
ENSMUSG00000090226	Gm16110	36	0.940404
ENSMUSG00000104304	Gm36974	36	0.940168
ENSMUSG00000050511	Oprd1	36	0.932798
ENSMUSG00000084833	Gm12649	36	0.927076
ENSMUSG00000029917	Qrfprl	36	0.921368
ENSMUSG00000097136		36	0.919373
ENSMUSG00000090088	Gm15934	36	0.918475
ENSMUSG00000022144	Gdnf	36	0.916637
ENSMUSG00000028172	Tacr3	36	0.915929
ENSMUSG00000041741	Pde3a	36	0.915173
ENSMUSG00000086696	Gm11234	36	0.915139
ENSMUSG00000028273	Pdlim5	36	0.914002
ENSMUSG00000019935	Slc17a8	36	0.911957
ENSMUSG00000023064	Sncg	36	0.908222
ENSMUSG00000102796	Gm37711	36	0.904211
ENSMUSG00000083682	Pcna-ps1	37	0.995592
ENSMUSG00000054986	Sec14l3	37	0.995094
ENSMUSG00000028262	Clca3a2	37	0.990364
ENSMUSG00000024256	Adcyap1	37	0.987828
ENSMUSG00000056025	Clca3a1	37	0.979714
ENSMUSG00000086758	Gm13912	37	0.970157
ENSMUSG00000032661	Oas3	37	0.969312
ENSMUSG00000100000	1700023F02Rik	37	0.966823
ENSMUSG00000026730	Pter	37	0.960665
ENSMUSG00000026786	Apbb1ip	37	0.959795
ENSMUSG00000027318	Adam33	37	0.955215
ENSMUSG00000034115	Scn11a	37	0.954906
ENSMUSG00000051860	Samd7	37	0.951369
ENSMUSG00000028028	Alpk1	37	0.94485
ENSMUSG00000046922	Gpr6	37	0.937391
ENSMUSG00000050994	Adgb	37	0.93656
ENSMUSG00000078606	Gvin2	37	0.935224
ENSMUSG00000020679	Hnf1b	37	0.935109
ENSMUSG00000087113	Gm11714	37	0.924257
ENSMUSG00000023367	Tmem176a	37	0.912674
ENSMUSG00000030617	Ccdc83	37	0.910396
ENSMUSG00000087401	Gm14664	37	0.906853
ENSMUSG00000053646	Plxnb1	37	0.90667
ENSMUSG00000041959	S100a10	37	0.903892
ENSMUSG00000093386	1700120O09Rik	38	0.997026
ENSMUSG00000093472	4930438E09Rik	38	0.995224
ENSMUSG00000075549	Gm6878	38	0.990437
ENSMUSG00000027750	Postn	38	0.98294
ENSMUSG00000022053	Ebf2	38	0.981225
ENSMUSG00000093634	Gm10860	38	0.980053
ENSMUSG00000010476	Ebf3	38	0.979325
ENSMUSG00000026483	Niban1	38	0.978921
ENSMUSG00000069372	Ctxn3	38	0.972849
ENSMUSG00000043008	Klhl6	38	0.971605
ENSMUSG00000068962	Zfp114	38	0.970033
ENSMUSG00000093400	Gm20647	38	0.967426
ENSMUSG00000005220	Corin	38	0.964782
ENSMUSG00000041731	Pgm5	38	0.963196
ENSMUSG00000057777	Mab21l2	38	0.956601
ENSMUSG00000085784	Gm12158	38	0.954262
ENSMUSG00000063286	Gvin-ps7	38	0.952184
ENSMUSG00000004098	Col5a3	38	0.949176
ENSMUSG00000078494	Gm13201	38	0.944371
ENSMUSG00000042045	Sln	38	0.941808
ENSMUSG00000098112	Bin2	38	0.934989
ENSMUSG00000044017	Adgrd1	38	0.929581
ENSMUSG00000033016	Nfatc1	38	0.926889
ENSMUSG00000058934	Igf1os	38	0.925768
ENSMUSG00000035033	Tbr1	38	0.922426
ENSMUSG00000018698	Lhx1	38	0.920872
ENSMUSG00000057098	Ebf1	38	0.917612
ENSMUSG00000040533	Matn1	38	0.90926
ENSMUSG00000087211	Lhx1os	38	0.90044
ENSMUSG00000038541	Srd5a2	39	0.994826
ENSMUSG00000029236	Nmu	39	0.987766
ENSMUSG00000085772	D630024D03Rik	39	0.981425
ENSMUSG00000051029	Serpinb1b	39	0.979029
ENSMUSG00000102470	Gm37244	39	0.978489
ENSMUSG00000022315	Slc30a8	39	0.973583
ENSMUSG00000045827	Serpinb9	39	0.97335
ENSMUSG00000048065	Cyb5r2	39	0.970825
ENSMUSG00000036528	Ppfibp2	39	0.968965
ENSMUSG00000068180	AY512915	39	0.965727
ENSMUSG00000026301	Iqca	39	0.962579
ENSMUSG00000084333	Gm11599	39	0.960316
ENSMUSG00000093738	AI606473	39	0.956813
ENSMUSG00000028339	Col15a1	39	0.950773
ENSMUSG00000087037	4930432L08Rik	39	0.947345
ENSMUSG00000032937	Fshr	39	0.943326
ENSMUSG00000039070	Cpa4	39	0.936478
ENSMUSG00000097247	1500012K07Rik	39	0.931127
ENSMUSG00000085562	2610028E06Rik	39	0.930696
ENSMUSG00000030110	Ret	39	0.929564
ENSMUSG00000046318	Ccbe1	39	0.926868
ENSMUSG00000097462	9530026P05Rik	39	0.925689
ENSMUSG00000026872	Zeb2	39	0.925564
ENSMUSG00000034486	Gbx2	39	0.920672
ENSMUSG00000030361	Klrb1a	39	0.918611
ENSMUSG00000054612	Mgmt	39	0.918334
ENSMUSG00000098040	Gm20757	39	0.9105
ENSMUSG00000101537	Gm29571	39	0.909569
ENSMUSG00000031344	Gabrq	39	0.906558
ENSMUSG00000022860	Chodl	39	0.906278
ENSMUSG00000002930	Ppp1r17	39	0.906055
ENSMUSG00000097201		39	0.905138
ENSMUSG00000049641	Vgll2	40	0.98595
ENSMUSG00000063975	Slco1a5	40	0.973526
ENSMUSG00000019893	Ros1	40	0.969068
ENSMUSG00000079262	Slco1a6	40	0.968432
ENSMUSG00000102363	Gm32999	40	0.963701
ENSMUSG00000027985	Lef1	40	0.960588
ENSMUSG00000081455	Hmgb1-ps3	40	0.959125
ENSMUSG00000073628	Gm10552	40	0.958989
ENSMUSG00000086876	Gm12828	40	0.957655
ENSMUSG00000039116	Adgrg6	40	0.957251
ENSMUSG00000085032	Gm11217	40	0.956208
ENSMUSG00000096684		40	0.954302
ENSMUSG00000087100	Gm14641	40	0.948366
ENSMUSG00000072109	A530040E14Rik	40	0.946371
ENSMUSG00000033542	Arhgef5	40	0.946148
ENSMUSG00000059022	Kcp	40	0.944939
ENSMUSG00000021298	Gpr132	40	0.943458
ENSMUSG00000100018	Gm7776	40	0.942976
ENSMUSG00000031552	Adam18	40	0.941266
ENSMUSG00000031661	Nkd1	40	0.939739
ENSMUSG00000087166	L1td1	40	0.939319
ENSMUSG00000005611	Irag1	40	0.936657
ENSMUSG00000087790	Gm25970	40	0.933767
ENSMUSG00000028031	Dkk2	40	0.93314
ENSMUSG00000006369	Fbln1	40	0.924714
ENSMUSG00000093117	Gm22699	40	0.922986
ENSMUSG00000024985	Tcf7l2	40	0.920708
ENSMUSG00000072492	Gm10364	40	0.91839
ENSMUSG00000089829	Gm16565	40	0.91773
ENSMUSG00000102482	Gm37924	40	0.917524
ENSMUSG00000021186	Fbln5	40	0.916865
ENSMUSG00000030562	Nox4	40	0.9137
ENSMUSG00000058620	Adra2b	40	0.912488
ENSMUSG00000018486	Wnt9b	40	0.911962
ENSMUSG00000091734	Vmn1r29	40	0.909932
ENSMUSG00000027860	Vangl1	40	0.909866
ENSMUSG00000097639	Platr4	40	0.909449
ENSMUSG00000032796	Lama1	40	0.907051
ENSMUSG00000005763	Cd247	40	0.906408
ENSMUSG00000091888	Vmn2r80	40	0.904738
ENSMUSG00000028369	Svep1	40	0.902264
ENSMUSG00000050315	Synpo2	40	0.900616
ENSMUSG00000023903	Mmp25	41	0.994202
ENSMUSG00000041782	Lad1	41	0.983213
ENSMUSG00000065220	Gm25794	41	0.983213
ENSMUSG00000076355		41	0.979316
ENSMUSG00000064486	Gm23293	41	0.97096
ENSMUSG00000101008	Gm29442	41	0.967308
ENSMUSG00000073008	Gpr174	41	0.963932
ENSMUSG00000065409		41	0.962352
ENSMUSG00000099322		41	0.962352
ENSMUSG00000049560	Defb20	41	0.961869
ENSMUSG00000091325	Gm3760	41	0.961729
ENSMUSG00000061878	Sphk1	41	0.96008
ENSMUSG00000099468	Gm28271	41	0.958897
ENSMUSG00000097118		41	0.957695
ENSMUSG00000070713	Gm10282	41	0.951076
ENSMUSG00000100172	Gm4412	41	0.948949
ENSMUSG00000099159		41	0.944914
ENSMUSG00000077494	Gm23595	41	0.942316
ENSMUSG00000023443	Esx1	41	0.939718
ENSMUSG00000041134	Cyyr1	41	0.938449
ENSMUSG00000081539	Gm11990	41	0.934144
ENSMUSG00000082706	Gm11663	41	0.930247
ENSMUSG00000063816	Gm4987	41	0.930247
ENSMUSG00000086335	Gm12107	41	0.92635
ENSMUSG00000093551	4930505G20Rik	41	0.924644
ENSMUSG00000070526	Peg12	41	0.923993
ENSMUSG00000099127		41	0.923993
ENSMUSG00000070504	Fcrl6	41	0.919059
ENSMUSG00000096385	Gm11168	41	0.916461
ENSMUSG00000030493	Faap24	41	0.911898
ENSMUSG00000067941	Gm7168	41	0.909153
ENSMUSG00000073406	H2-Bl	41	0.907389
ENSMUSG00000098595		41	0.905118
ENSMUSG00000080866	Gm5687	42	0.982953
ENSMUSG00000090795	Gm7346	42	0.976788
ENSMUSG00000100658	F730311O21Rik	42	0.974591
ENSMUSG00000035493	Tgfbi	42	0.969329
ENSMUSG00000021342	Prl	42	0.968214
ENSMUSG00000067341	H2-Eb2	42	0.967853
ENSMUSG00000102187	Gm7897	42	0.965025
ENSMUSG00000062210	Tnfaip8	42	0.963968
ENSMUSG00000020583	Matn3	42	0.962829
ENSMUSG00000021765	Fst	42	0.959642
ENSMUSG00000077593	Gm26014	42	0.958648
ENSMUSG00000022382	Wnt7b	42	0.956685
ENSMUSG00000041247	Lamp3	42	0.953475
ENSMUSG00000082295	Gm12133	42	0.948197
ENSMUSG00000081965	Gm11620	42	0.948197
ENSMUSG00000039095	En2	42	0.944902
ENSMUSG00000087825	Gm22279	42	0.937603
ENSMUSG00000044303	Cdkn2a	42	0.936683
ENSMUSG00000056947	Mab21l1	42	0.936225
ENSMUSG00000021998	Lcp1	42	0.935404
ENSMUSG00000083053	Gm15001	42	0.933701
ENSMUSG00000057777	Mab21l2	42	0.933311
ENSMUSG00000044664	Prss42	42	0.929384
ENSMUSG00000024985	Tcf7l2	42	0.927029
ENSMUSG00000032446	Eomes	42	0.925784
ENSMUSG00000036136	Fam110c	42	0.925275
ENSMUSG00000043385	Olfr267	42	0.925275
ENSMUSG00000102073	Gm6818	42	0.924409
ENSMUSG00000043155	Hpdl	42	0.917853
ENSMUSG00000075256	Cerkl	42	0.914093
ENSMUSG00000098000	Gm27026	42	0.913922
ENSMUSG00000103016	Gm37506	42	0.91356
ENSMUSG00000043168	4930426D05Rik	42	0.91195
ENSMUSG00000066693	Gm7493	42	0.910733
ENSMUSG00000085345	Gm16064	42	0.906956
ENSMUSG00000040258	Nxph4	42	0.906377
ENSMUSG00000022871	Fetub	42	0.90347
ENSMUSG00000088497		42	0.90347
ENSMUSG00000040260	Daam2	42	0.902297
ENSMUSG00000087465	Gm13905	43	0.977037
ENSMUSG00000093765	Gm20658	43	0.974775
ENSMUSG00000011171	Vipr2	43	0.974435
ENSMUSG00000067604	Nms	43	0.973998
ENSMUSG00000044258	Ctla2a	43	0.970708
ENSMUSG00000021099	Six6	43	0.963415
ENSMUSG00000038071	Npy6r	43	0.962609
ENSMUSG00000048516	Adam26a	43	0.962145
ENSMUSG00000089373	Gm22138	43	0.960174
ENSMUSG00000096322		43	0.958202
ENSMUSG00000078894	2210418O10Rik	43	0.957969
ENSMUSG00000050558	Prokr2	43	0.957638
ENSMUSG00000103599	Gm37356	43	0.952626
ENSMUSG00000040616	Tmem51	43	0.950669
ENSMUSG00000037833	Sh2d4b	43	0.947856
ENSMUSG00000032841	Prr5l	43	0.947679
ENSMUSG00000043430	Psapl1	43	0.947387
ENSMUSG00000097648	9330185C12Rik	43	0.947039
ENSMUSG00000085532	B430319H21Rik	43	0.946337
ENSMUSG00000066755	Tnfsf18	43	0.944609
ENSMUSG00000020734	Grin2c	43	0.94124
ENSMUSG00000102197	Gm38170	43	0.936092
ENSMUSG00000026475	Rgs16	43	0.933157
ENSMUSG00000100334	C230024C17Rik	43	0.932946
ENSMUSG00000071226	Cecr2	43	0.931916
ENSMUSG00000021335	Slc17a1	43	0.930084
ENSMUSG00000083233	Gm13406	43	0.929342
ENSMUSG00000018698	Lhx1	43	0.923734
ENSMUSG00000038415	Foxq1	43	0.9232
ENSMUSG00000101383	Gm28843	43	0.92277
ENSMUSG00000026700	Tnfsf4	43	0.92223
ENSMUSG00000086254	3100003L05Rik	43	0.921213
ENSMUSG00000087211	Lhx1os	43	0.919532
ENSMUSG00000065604	Mir29b-1	43	0.918348
ENSMUSG00000079070	Gm3985	43	0.917437
ENSMUSG00000079460	4933403O08Rik	43	0.91695
ENSMUSG00000033502	Cdc14a	43	0.915491
ENSMUSG00000024517	Grp	43	0.913671
ENSMUSG00000091679	Vmn2r96	43	0.913109
ENSMUSG00000097247	1500012K07Rik	43	0.907033
ENSMUSG00000082008	Gm12390	43	0.907011
ENSMUSG00000089631	Gm16326	43	0.903091
ENSMUSG00000056671	Prelid2	43	0.902549
ENSMUSG00000028457	Atp8b5	43	0.901382
ENSMUSG00000059864	Olfr1393	44	0.984161
ENSMUSG00000077460	Gm26419	44	0.982798
ENSMUSG00000076436	Oxct2a	44	0.976951
ENSMUSG00000085561	1700046C09Rik	44	0.970844
ENSMUSG00000036449	Lcn8	44	0.966953
ENSMUSG00000099922	Gm29016	44	0.964705
ENSMUSG00000089617	Scarna10	44	0.961741
ENSMUSG00000003227	Edar	44	0.960867
ENSMUSG00000066983	Gm16519	44	0.957793
ENSMUSG00000087179	5730471H19Rik	44	0.956457
ENSMUSG00000097717	1700066J03Rik	44	0.954865
ENSMUSG00000039146	Ifi44l	44	0.952682
ENSMUSG00000072999	Gm15401	44	0.952524
ENSMUSG00000087734	Gm24646	44	0.95016
ENSMUSG00000046180	Magea13	44	0.95016
ENSMUSG00000082330	Ldha-ps	44	0.944858
ENSMUSG00000099491	4930533D04Rik	44	0.944858
ENSMUSG00000094224		44	0.938881
ENSMUSG00000024521	Pmaip1	44	0.936517
ENSMUSG00000086810	Gm13110	44	0.934773
ENSMUSG00000091528	Vmn2r-ps158	44	0.928845
ENSMUSG00000003420	Fcgrt	44	0.925871
ENSMUSG00000090165	Ugt1a10	44	0.922998
ENSMUSG00000020258	Glyctk	44	0.918309
ENSMUSG00000044177	Wfikkn2	44	0.911316
ENSMUSG00000086565	Gm13133	44	0.902521
ENSMUSG00000092272	Gm19301	44	0.901528
ENSMUSG00000079350	Magea8	44	0.900723
ENSMUSG00000025496	Drd4	45	0.997331
ENSMUSG00000074655	Gm1527	45	0.982449
ENSMUSG00000066867	Oas1e	45	0.982242
ENSMUSG00000062962	Gm6378	45	0.974468
ENSMUSG00000086470	Gm12580	45	0.97278
ENSMUSG00000057157	Gm6054	45	0.967149
ENSMUSG00000081689	Gm9166	45	0.965142
ENSMUSG00000100121	1700025N23Rik	45	0.960816
ENSMUSG00000048747	E130114P18Rik	45	0.95742
ENSMUSG00000087563	Gm14205	45	0.955188
ENSMUSG00000103633	Gm38328	45	0.954169
ENSMUSG00000082532	Rpl31-ps6	45	0.95059
ENSMUSG00000096192	Gm18856	45	0.947081
ENSMUSG00000071547	Nt5dc2	45	0.942871
ENSMUSG00000088514		45	0.941738
ENSMUSG00000087032	Gm13874	45	0.938842
ENSMUSG00000015647	Lama5	45	0.936912
ENSMUSG00000021943	Gdf10	45	0.9325
ENSMUSG00000084208	Gm12792	45	0.929618
ENSMUSG00000082755	Gm8692	45	0.929618
ENSMUSG00000100221	4930532M18Rik	45	0.928366
ENSMUSG00000095296	Gm8906	45	0.928366
ENSMUSG00000041372	B4galnt3	45	0.928327
ENSMUSG00000055632	Hmcn2	45	0.92209
ENSMUSG00000088836	Gm23546	45	0.921876
ENSMUSG00000040254	Sema3d	45	0.921296
ENSMUSG00000052248	Zeb2os	45	0.920676
ENSMUSG00000033740	St18	45	0.92036
ENSMUSG00000086696	Gm11234	45	0.919817
ENSMUSG00000101634	1700066B17Rik	45	0.916271
ENSMUSG00000095564	Gm20474	45	0.915418
ENSMUSG00000098559	Gm15013	45	0.915229
ENSMUSG00000085055	Gm15958	45	0.913358
ENSMUSG00000064080	Fbln2	45	0.906428
ENSMUSG00000038255	Neurod2	46	0.977588
ENSMUSG00000070570	Slc17a7	46	0.974677
ENSMUSG00000037984	Neurod6	46	0.972506
ENSMUSG00000005917	Otx1	46	0.964556
ENSMUSG00000085429	Gm13485	46	0.962785
ENSMUSG00000029151	Slc30a3	46	0.958859
ENSMUSG00000026676	Ccdc3	46	0.956267
ENSMUSG00000097770		46	0.955217
ENSMUSG00000086549	Gm13648	46	0.954535
ENSMUSG00000031216	Stard8	46	0.94411
ENSMUSG00000085007	Smim43	46	0.94397
ENSMUSG00000023336	Wfdc1	46	0.938784
ENSMUSG00000079415	Cntf	46	0.936748
ENSMUSG00000061132	Blnk	46	0.936656
ENSMUSG00000030047	Arhgap25	46	0.934383
ENSMUSG00000075480	Gm10840	46	0.933746
ENSMUSG00000086824	4930448D08Rik	46	0.933746
ENSMUSG00000072780	Vmn2r24	46	0.933746
ENSMUSG00000028359	Orm3	46	0.931666
ENSMUSG00000015812	Gnrh1	46	0.930493
ENSMUSG00000051985	Igfn1	46	0.929397
ENSMUSG00000065836	Gm23502	46	0.924254
ENSMUSG00000050625	Ccdc121	46	0.922211
ENSMUSG00000027416	Otor	46	0.922211
ENSMUSG00000019767	Ccdc170	46	0.921449
ENSMUSG00000049744	Arhgap15	46	0.91987
ENSMUSG00000034382	AI661453	46	0.918243
ENSMUSG00000034209	Rasl10a	46	0.917548
ENSMUSG00000078984	Gm11027	46	0.917414
ENSMUSG00000085491	4930527E20Rik	46	0.91722
ENSMUSG00000000739	Sult5a1	46	0.916117
ENSMUSG00000065340	Gm25578	46	0.914716
ENSMUSG00000100166	B230110G15Rik	46	0.913623
ENSMUSG00000098650	Commd1b	46	0.913523
ENSMUSG00000104091	Gm37317	46	0.912862
ENSMUSG00000083587	Gm14741	46	0.912568
ENSMUSG00000082164	Gm13360	46	0.910517
ENSMUSG00000032487	Ptgs2	46	0.910349
ENSMUSG00000067879	Vxn	46	0.909547
ENSMUSG00000032530	Lyzl4	46	0.908859
ENSMUSG00000103114	Gm32200	46	0.907169
ENSMUSG00000097999	Gm9061	46	0.906567
ENSMUSG00000103914	Gm38073	46	0.905653
ENSMUSG00000029154	Cwh43	46	0.905565
ENSMUSG00000089546		46	0.902328
ENSMUSG00000104340	Gm10522	47	0.987087
ENSMUSG00000062345	Serpinb2	47	0.978343
ENSMUSG00000084124	Gm13588	47	0.97116
ENSMUSG00000083594	Gm13722	47	0.962341
ENSMUSG00000084772	Gm15473	47	0.96228
ENSMUSG00000092600	Gm20442	47	0.962226
ENSMUSG00000086248	Gm16127	47	0.962165
ENSMUSG00000087539	Gm13584	47	0.958979
ENSMUSG00000099741	Gm5253	47	0.9584
ENSMUSG00000028864	Hgf	47	0.957212
ENSMUSG00000020911	Krt19	47	0.954719
ENSMUSG00000081646	Gm15060	47	0.949973
ENSMUSG00000000247	Lhx2	47	0.946258
ENSMUSG00000096270	Vmn2r-ps134	47	0.943369
ENSMUSG00000092464	Gm8902	47	0.943369
ENSMUSG00000048200	Cracr2b	47	0.939374
ENSMUSG00000036560	Lgi4	47	0.934093
ENSMUSG00000030361	Klrb1a	47	0.931972
ENSMUSG00000085044	1700109G15Rik	47	0.931476
ENSMUSG00000083208	Gm11522	47	0.931103
ENSMUSG00000085940	4930405D11Rik	47	0.93089
ENSMUSG00000035785	Cmtm2b	47	0.930807
ENSMUSG00000072387	Gm10356	47	0.929715
ENSMUSG00000097459		47	0.929697
ENSMUSG00000098967		47	0.928767
ENSMUSG00000024757	Slc22a19	47	0.92506
ENSMUSG00000019230	Lhx9	47	0.920073
ENSMUSG00000040280	Ndufa4l2	47	0.918435
ENSMUSG00000056947	Mab21l1	47	0.91525
ENSMUSG00000071490	Vmn1r212	47	0.913919
ENSMUSG00000073257	Gm10488	47	0.913919
ENSMUSG00000068674	Gm10247	47	0.911164
ENSMUSG00000086236	5830418P13Rik	47	0.910076
ENSMUSG00000101624	Gm28882	47	0.908645
ENSMUSG00000083386	Gm15426	47	0.90855
ENSMUSG00000034765	Dusp5	47	0.90852
ENSMUSG00000081105		47	0.90133
ENSMUSG00000044217	Aqp5	48	0.989124
ENSMUSG00000077505	Gm24233	48	0.987283
ENSMUSG00000090561	Gm17207	48	0.981194
ENSMUSG00000035021	Baz1a	48	0.979657
ENSMUSG00000003545	Fosb	48	0.975388
ENSMUSG00000036770	Stpg3	48	0.975116
ENSMUSG00000103130	F830212C03Rik	48	0.97149
ENSMUSG00000037474	Dtl	48	0.970458
ENSMUSG00000026628	Atf3	48	0.968265
ENSMUSG00000103921	Gm5841	48	0.968113
ENSMUSG00000071341	Egr4	48	0.965348
ENSMUSG00000081339	Gm16044	48	0.964495
ENSMUSG00000102493	Gm8010	48	0.962774
ENSMUSG00000061959	Ces1e	48	0.958656
ENSMUSG00000088566		48	0.956403
ENSMUSG00000083756		48	0.954853
ENSMUSG00000007379	Dennd2c	48	0.949837
ENSMUSG00000101079	Gm28991	48	0.94887
ENSMUSG00000057945	Gm17136	48	0.948125
ENSMUSG00000064722	Gm25857	48	0.946431
ENSMUSG00000100457	D830032E09Rik	48	0.945148
ENSMUSG00000102419	Gm36940	48	0.943207
ENSMUSG00000024679	Ms4a6d	48	0.941551
ENSMUSG00000071104	Ccdc110	48	0.939215
ENSMUSG00000053830	Gm9923	48	0.935319
ENSMUSG00000028341	Nr4a3	48	0.929903
ENSMUSG00000083794	Gm16123	48	0.925901
ENSMUSG00000017767	Spata25	48	0.925307
ENSMUSG00000057719	Sh3rf2	48	0.923719
ENSMUSG00000029135	Fosl2	48	0.918762
ENSMUSG00000075538	Gm10855	48	0.918618
ENSMUSG00000023034	Nr4a1	48	0.917166
ENSMUSG00000087520	Gm14389	48	0.916936
ENSMUSG00000023216	Epb42	48	0.905604
ENSMUSG00000017146	Brca1	48	0.904356
ENSMUSG00000046733	Gprc5a	48	0.900471
ENSMUSG00000094452		49	0.97293
ENSMUSG00000062732	Lypd4	49	0.967425
ENSMUSG00000102718	Gm37761	49	0.960462
ENSMUSG00000082850	Gm14299	49	0.960462
ENSMUSG00000085194	Platr32	49	0.960019
ENSMUSG00000086289	Gm16933	49	0.955797
ENSMUSG00000089171	Gm22430	49	0.955797
ENSMUSG00000079323	Gm20661	49	0.951554
ENSMUSG00000091680	Klhdc7b	49	0.947671
ENSMUSG00000079058	Adam34	49	0.946196
ENSMUSG00000071229	Timm8a2	49	0.943412
ENSMUSG00000086147	Zfp989	49	0.941948
ENSMUSG00000031250	Tnmd	49	0.939462
ENSMUSG00000022931	Krtap15	49	0.939161
ENSMUSG00000091277	Gm1818	49	0.936857
ENSMUSG00000078377	Gm4294	49	0.936483
ENSMUSG00000092958	Mir5128	49	0.934199
ENSMUSG00000038259	Gdf5	49	0.92977
ENSMUSG00000099219		49	0.924679
ENSMUSG00000033114	Slc35d2	49	0.923743
ENSMUSG00000103840	1700040K01Rik	49	0.922403
ENSMUSG00000085301	Gm12132	49	0.92195
ENSMUSG00000050190	Adam34l	49	0.920439
ENSMUSG00000090176	Cd200r2	49	0.914669
ENSMUSG00000081571	Gm12125	49	0.913416
ENSMUSG00000099605	1700066N21Rik	49	0.913416
ENSMUSG00000085256	Dmrta2os	49	0.911037
ENSMUSG00000099370	Platr10	49	0.910542
ENSMUSG00000098191	Gm26962	49	0.907284
ENSMUSG00000081816	Gm15528	49	0.906869
ENSMUSG00000095654	Plscr5	49	0.902079
ENSMUSG00000101812	D530049I02Rik	50	0.984934
ENSMUSG00000027861	Casq2	50	0.984074
ENSMUSG00000080978	Gm12297	50	0.982429
ENSMUSG00000042485	Mustn1	50	0.979538
ENSMUSG00000056569	Mpz	50	0.979253
ENSMUSG00000096016	Gm20937	50	0.977326
ENSMUSG00000086187	Gm12860	50	0.974477
ENSMUSG00000030492	Slc7a9	50	0.972439
ENSMUSG00000102240	Gm37717	50	0.971982
ENSMUSG00000092553	Gm20428	50	0.969878
ENSMUSG00000030157	Clec2d	50	0.966506
ENSMUSG00000097352	C920009B18Rik	50	0.966171
ENSMUSG00000083558	Gm12896	50	0.958595
ENSMUSG00000083154	Gm11892	50	0.958421
ENSMUSG00000077338	Gm23294	50	0.958073
ENSMUSG00000032596	Uba7	50	0.957892
ENSMUSG00000084890	A830036E02Rik	50	0.950328
ENSMUSG00000030617	Ccdc83	50	0.949244
ENSMUSG00000102876	Gm37136	50	0.948068
ENSMUSG00000022596	Slurp1	50	0.947241
ENSMUSG00000090135	Gm15809	50	0.946693
ENSMUSG00000094815		50	0.946187
ENSMUSG00000084825	2410152P15Rik	50	0.944699
ENSMUSG00000104042	Gm37564	50	0.942697
ENSMUSG00000091842	Gm16490	50	0.942031
ENSMUSG00000103869	Gm37420	50	0.932136
ENSMUSG00000036587	Fut7	50	0.931699
ENSMUSG00000020713	Gh	50	0.931209
ENSMUSG00000035775	Krt20	50	0.925589
ENSMUSG00000089636	1700058P15Rik	50	0.924497
ENSMUSG00000001014	Icam4	50	0.920963
ENSMUSG00000083974	Gm16053	50	0.917113
ENSMUSG00000092125	AA543401	50	0.916904
ENSMUSG00000028186	Uox	50	0.915529
ENSMUSG00000103597	Gm19777	50	0.905732
ENSMUSG00000079262	Slco1a6	50	0.90561
ENSMUSG00000054580	Pla2r1	51	0.986335
ENSMUSG00000021835	Bmp4	51	0.984616
ENSMUSG00000001029	Icam2	51	0.974907
ENSMUSG00000097962	1700034G24Rik	51	0.971489
ENSMUSG00000098635		51	0.95997
ENSMUSG00000074170	Plekhf1	51	0.959863
ENSMUSG00000065107	n-R5s88	51	0.953399
ENSMUSG00000101660	Gm18666	51	0.950811
ENSMUSG00000086586	Gm11192	51	0.948669
ENSMUSG00000026980	Ly75	51	0.947967
ENSMUSG00000034362	Csta1	51	0.945349
ENSMUSG00000083897	Gm14843	51	0.942053
ENSMUSG00000064398	Gm23628	51	0.94083
ENSMUSG00000024900	Cpt1a	51	0.939064
ENSMUSG00000007041	Clic1	51	0.938514
ENSMUSG00000067344	Rps25-ps1	51	0.937359
ENSMUSG00000010476	Ebf3	51	0.933915
ENSMUSG00000096534	Krtap16-3	51	0.930738
ENSMUSG00000041707	Tmem273	51	0.930017
ENSMUSG00000102004	4933402C06Rik	51	0.925669
ENSMUSG00000081745	Gm15549	51	0.923912
ENSMUSG00000055322	Tns1	51	0.923813
ENSMUSG00000033826	Dnah8	51	0.921606
ENSMUSG00000097280	AI849053	51	0.919036
ENSMUSG00000037727	Avp	51	0.918298
ENSMUSG00000101849	Gm28386	51	0.915814
ENSMUSG00000029510	Gpc2	51	0.915513
ENSMUSG00000019913	Sim1	51	0.915502
ENSMUSG00000080058	Gm11175	51	0.91454
ENSMUSG00000027995	Tlr2	51	0.908459
ENSMUSG00000087989		51	0.906583
ENSMUSG00000085636	Gm11769	51	0.905772
ENSMUSG00000100827	Gm29069	51	0.904464
