# Supplementary material
Source: Research Square preprint supplement (doi:10.21203/rs.3.rs-9822028/v1)
Supplement: Supplementary file 4 [file eca3ed723c69f837038cd702.xlsx]

## Sheet: Sheet1
gene	symbol	Cluster	Specificity Score
ENSMUSG00000024985	Tcf7l2	1	0.996825
ENSMUSG00000026805	Barhl1	1	0.99467
ENSMUSG00000042596	Tfap2d	1	0.98756
ENSMUSG00000028864	Hgf	1	0.942024
ENSMUSG00000022237	Ankrd33b	1	0.942004
ENSMUSG00000053310	Nrgn	1	0.940256
ENSMUSG00000032128	Robo3	1	0.939816
ENSMUSG00000058624	Gda	1	0.933341
ENSMUSG00000024647	Cbln2	1	0.908068
ENSMUSG00000062210	Tnfaip8	2	0.998087
ENSMUSG00000031825	Crispld2	2	0.986962
ENSMUSG00000086600	C030005K06Rik	2	0.981591
ENSMUSG00000096883	Shisa8	2	0.978921
ENSMUSG00000053626	Tll1	2	0.964221
ENSMUSG00000031995	St14	2	0.963371
ENSMUSG00000021337	Scgn	2	0.957147
ENSMUSG00000085222	Gm13974	2	0.953136
ENSMUSG00000101448	Gm28494	2	0.944837
ENSMUSG00000089656	Gm16271	2	0.935548
ENSMUSG00000022687	Boc	2	0.935258
ENSMUSG00000001076	C1ql4	2	0.933852
ENSMUSG00000035459	Stab2	2	0.928909
ENSMUSG00000039004	Bmp6	2	0.924956
ENSMUSG00000020805	Slc13a5	2	0.920035
ENSMUSG00000044017	Adgrd1	2	0.908374
ENSMUSG00000028364	Tnc	2	0.90727
ENSMUSG00000012520	Phox2b	3	1
ENSMUSG00000102600	Gm37266	3	0.990235
ENSMUSG00000086541	Has2os	3	0.985289
ENSMUSG00000049115	Agtr1a	3	0.954659
ENSMUSG00000017897	Eya2	3	0.954048
ENSMUSG00000054988	Agtr1b	3	0.945945
ENSMUSG00000103539	Gm37834	3	0.942613
ENSMUSG00000041730	Prrxl1	3	0.94212
ENSMUSG00000052430	Bmpr1b	3	0.934185
ENSMUSG00000056380	Gpr50	3	0.908442
ENSMUSG00000034485	Uaca	3	0.900041
ENSMUSG00000100168	Gm28526	4	0.999416
ENSMUSG00000062960	Kdr	4	0.992474
ENSMUSG00000069378	Prdm6	4	0.987257
ENSMUSG00000029710	Ephb4	4	0.975976
ENSMUSG00000059901	Adamts14	4	0.973132
ENSMUSG00000041559	Fmod	4	0.97283
ENSMUSG00000022864	D16Ertd472e	4	0.963035
ENSMUSG00000009876	Cox4i2	4	0.959876
ENSMUSG00000046593	Tmem215	4	0.95376
ENSMUSG00000066477	Gm16551	4	0.952103
ENSMUSG00000022876	Samsn1	4	0.948558
ENSMUSG00000087500	Gm12426	4	0.944659
ENSMUSG00000022014	Epsti1	4	0.935021
ENSMUSG00000026837	Col5a1	4	0.934234
ENSMUSG00000071847	Apcdd1	4	0.920801
ENSMUSG00000035274	Tpbg	4	0.911185
ENSMUSG00000056031	9330154J02Rik	4	0.908422
ENSMUSG00000043013	Onecut1	4	0.90697
ENSMUSG00000085510	Mir217hg	4	0.905765
ENSMUSG00000045991	Onecut2	4	0.905548
ENSMUSG00000086911	Gm12027	4	0.90348
ENSMUSG00000013846	St3gal1	4	0.902077
ENSMUSG00000036972	Zic4	5	0.995062
ENSMUSG00000021337	Scgn	5	0.979895
ENSMUSG00000047129	1700113H08Rik	5	0.97793
ENSMUSG00000086600	C030005K06Rik	5	0.967178
ENSMUSG00000097928		5	0.966536
ENSMUSG00000032368	Zic1	5	0.96367
ENSMUSG00000043659	Npsr1	5	0.960428
ENSMUSG00000027070	Lrp2	5	0.957728
ENSMUSG00000017417	Plxdc1	5	0.934362
ENSMUSG00000023484	Prph	5	0.933694
ENSMUSG00000043441	Gpr149	5	0.930156
ENSMUSG00000028487	Bnc2	5	0.928905
ENSMUSG00000062210	Tnfaip8	5	0.925936
ENSMUSG00000023945	Slc5a7	5	0.923279
ENSMUSG00000055415	Atp10b	5	0.922387
ENSMUSG00000073910	Mob3b	5	0.921963
ENSMUSG00000032724	Abtb2	5	0.920512
ENSMUSG00000086126	Evx1os	5	0.917307
ENSMUSG00000069378	Prdm6	5	0.91501
ENSMUSG00000001076	C1ql4	5	0.900724
ENSMUSG00000070780	Rbm47	6	0.989756
ENSMUSG00000021604	Irx4	6	0.989171
ENSMUSG00000018845	Unc45b	6	0.979521
ENSMUSG00000021478	Drd1	6	0.977544
ENSMUSG00000040969	Arhgef38	6	0.968515
ENSMUSG00000063727	Tnfrsf11b	6	0.956239
ENSMUSG00000029304	Spp1	6	0.954323
ENSMUSG00000042655	Shisal2b	6	0.953402
ENSMUSG00000051354	Samd3	6	0.951565
ENSMUSG00000052951	C130021I20Rik	6	0.950665
ENSMUSG00000087501	Gm12116	6	0.929372
ENSMUSG00000069132	Nxph2	6	0.909074
ENSMUSG00000004151	Etv1	6	0.90649
ENSMUSG00000040610	Tlx3	6	0.901841
ENSMUSG00000026042	Col5a2	7	0.996
ENSMUSG00000010175	Prox1	7	0.990437
ENSMUSG00000030905	Crym	7	0.982278
ENSMUSG00000087413	Gm11266	7	0.981276
ENSMUSG00000001911	Nfix	7	0.977147
ENSMUSG00000008575	Nfib	7	0.971346
ENSMUSG00000048747	E130114P18Rik	7	0.967498
ENSMUSG00000100009	Gm7967	7	0.967164
ENSMUSG00000100303	2600014E21Rik	7	0.954927
ENSMUSG00000025932	Eya1	7	0.952527
ENSMUSG00000028517	Plpp3	7	0.914637
ENSMUSG00000027833	Shox2	7	0.907815
ENSMUSG00000047330	Kcne4	8	0.999359
ENSMUSG00000073821	8030451A03Rik	8	0.990871
ENSMUSG00000078932	CN725425	8	0.99032
ENSMUSG00000028364	Tnc	8	0.983978
ENSMUSG00000002228	Ppm1j	8	0.971067
ENSMUSG00000043088	Il17re	8	0.966515
ENSMUSG00000020734	Grin2c	8	0.957797
ENSMUSG00000027985	Lef1	8	0.938223
ENSMUSG00000049796	Crh	8	0.935271
ENSMUSG00000039004	Bmp6	8	0.921669
ENSMUSG00000029484	Anxa3	8	0.915878
ENSMUSG00000034810	Scn7a	8	0.908988
ENSMUSG00000085222	Gm13974	8	0.906138
ENSMUSG00000086496	Gm14204	9	0.997967
ENSMUSG00000028717	Tal1	9	0.985627
ENSMUSG00000029151	Slc30a3	9	0.979483
ENSMUSG00000070880	Gad1	9	0.959812
ENSMUSG00000087211	Lhx1os	9	0.955148
ENSMUSG00000015619	Gata3	9	0.948346
ENSMUSG00000045731	Pnoc	9	0.947658
ENSMUSG00000092355		9	0.939728
ENSMUSG00000037771	Slc32a1	9	0.925205
ENSMUSG00000053747	Sox14	9	0.904522
ENSMUSG00000079058	Adam34	10	0.99569
ENSMUSG00000019935	Slc17a8	10	0.992093
ENSMUSG00000047139	Cd24a	10	0.989112
ENSMUSG00000025723	Nmb	10	0.980801
ENSMUSG00000033502	Cdc14a	10	0.95622
ENSMUSG00000023964	Calcr	10	0.948393
ENSMUSG00000031613	Hpgd	10	0.94154
ENSMUSG00000023577		10	0.93391
ENSMUSG00000038115	Ano2	10	0.922815
ENSMUSG00000037016	Frem2	10	0.920174
ENSMUSG00000086126	Evx1os	10	0.913892
ENSMUSG00000020007	Il20ra	11	0.99115
ENSMUSG00000030669	Calca	11	0.989123
ENSMUSG00000032690	Oas2	11	0.981523
ENSMUSG00000030666	Calcb	11	0.979126
ENSMUSG00000055368	Slc6a2	11	0.973079
ENSMUSG00000029381	Shroom3	11	0.971169
ENSMUSG00000021680	Crhbp	11	0.970135
ENSMUSG00000099938	C030007H22Rik	11	0.969635
ENSMUSG00000050473	Slc35d3	11	0.962479
ENSMUSG00000020690	Efcab3	11	0.954894
ENSMUSG00000021919	Chat	11	0.950254
ENSMUSG00000025780	Itih5	11	0.949212
ENSMUSG00000019890	Nts	11	0.944867
ENSMUSG00000085562	2610028E06Rik	11	0.944593
ENSMUSG00000026686	Lmx1a	11	0.94078
ENSMUSG00000031548	Sfrp1	11	0.937662
ENSMUSG00000042613	Pbxip1	11	0.934288
ENSMUSG00000047642	D930020B18Rik	11	0.923242
ENSMUSG00000075012	Fjx1	11	0.914544
ENSMUSG00000032440	Tgfbr2	11	0.912927
ENSMUSG00000028780	Sema3c	11	0.904032
ENSMUSG00000032369	Plscr1	11	0.903543
ENSMUSG00000020061	Mybpc1	12	1
ENSMUSG00000041731	Pgm5	12	0.987692
ENSMUSG00000051079	Rgs13	12	0.986014
ENSMUSG00000026668	Ucma	12	0.962646
ENSMUSG00000037016	Frem2	12	0.961594
ENSMUSG00000020407	Upp1	12	0.961283
ENSMUSG00000048747	E130114P18Rik	12	0.959165
ENSMUSG00000047878	A4galt	12	0.958479
ENSMUSG00000021803	Cdhr1	12	0.955012
ENSMUSG00000064080	Fbln2	12	0.950644
ENSMUSG00000087365	C430049B03Rik	12	0.948706
ENSMUSG00000020641	Rsad2	12	0.939788
ENSMUSG00000024039	Cbs	12	0.933023
ENSMUSG00000034224	Slc38a8	12	0.930745
ENSMUSG00000024517	Grp	12	0.930293
ENSMUSG00000087277	2010013B24Rik	12	0.915151
ENSMUSG00000063564	Col23a1	12	0.912454
ENSMUSG00000045672	Col27a1	12	0.910691
ENSMUSG00000016918	Sulf1	12	0.908498
ENSMUSG00000001988	Npas1	13	0.967727
ENSMUSG00000075549	Gm6878	13	0.966715
ENSMUSG00000027996	Sfrp2	13	0.965823
ENSMUSG00000021186	Fbln5	13	0.957764
ENSMUSG00000059049	Frem1	13	0.941006
ENSMUSG00000093472	4930438E09Rik	13	0.934851
ENSMUSG00000087388	Gm12128	13	0.928639
ENSMUSG00000028487	Bnc2	13	0.923241
ENSMUSG00000027318	Adam33	13	0.915248
ENSMUSG00000021848	Otx2	13	0.91066
ENSMUSG00000082841	Gm12994	14	0.992894
ENSMUSG00000028003	Lrat	14	0.990761
ENSMUSG00000023945	Slc5a7	14	0.986343
ENSMUSG00000101792	Gm28447	14	0.979103
ENSMUSG00000040998	Npnt	14	0.963487
ENSMUSG00000031825	Crispld2	14	0.955255
ENSMUSG00000031995	St14	14	0.946352
ENSMUSG00000035459	Stab2	14	0.936689
ENSMUSG00000089656	Gm16271	14	0.930202
ENSMUSG00000048616	Nog	14	0.920729
ENSMUSG00000020205	Phlda1	14	0.905877
ENSMUSG00000022687	Boc	14	0.903953
ENSMUSG00000032368	Zic1	14	0.902846
ENSMUSG00000046500	Tafa4	15	1
ENSMUSG00000021239	Vsx2	15	0.992966
ENSMUSG00000018698	Lhx1	15	0.983099
ENSMUSG00000098649	Gm27199	15	0.972074
ENSMUSG00000031727	Pmfbp1	15	0.969079
ENSMUSG00000017493	Igfbp4	15	0.948509
ENSMUSG00000043719	Col6a6	15	0.94509
ENSMUSG00000042961	Egflam	15	0.944034
ENSMUSG00000036357	Gpr101	15	0.92932
ENSMUSG00000025932	Eya1	15	0.912431
ENSMUSG00000087211	Lhx1os	15	0.910361
ENSMUSG00000031688	Pou4f2	15	0.910084
ENSMUSG00000030717	Nupr1	16	0.995511
ENSMUSG00000101537	Gm29571	16	0.993571
ENSMUSG00000030607	Acan	16	0.983797
ENSMUSG00000028024	Enpep	16	0.983763
ENSMUSG00000091387	Gcnt4	16	0.97892
ENSMUSG00000053368	Rxfp2	16	0.976981
ENSMUSG00000074622	Mafb	16	0.971079
ENSMUSG00000043822	Adamtsl5	16	0.96985
ENSMUSG00000023243	Kcnk5	16	0.968371
ENSMUSG00000048126	Col6a3	16	0.960933
ENSMUSG00000047746	Fbxo40	16	0.954363
ENSMUSG00000097198		16	0.953084
ENSMUSG00000051747	Ttn	16	0.951279
ENSMUSG00000029304	Spp1	16	0.949358
ENSMUSG00000069378	Prdm6	16	0.943218
ENSMUSG00000026826	Nr4a2	16	0.940081
ENSMUSG00000055435	Maf	16	0.938288
ENSMUSG00000029054	Gabrd	16	0.937506
ENSMUSG00000083050	Gm11242	16	0.934857
ENSMUSG00000011171	Vipr2	16	0.931071
ENSMUSG00000046480	Scn4b	16	0.911162
ENSMUSG00000031548	Sfrp1	16	0.905151
ENSMUSG00000046318	Ccbe1	16	0.904384
ENSMUSG00000103594	A430034D21Rik	17	0.998092
ENSMUSG00000102941	Gm37552	17	0.990378
ENSMUSG00000020021	Fgd6	17	0.983611
ENSMUSG00000038115	Ano2	17	0.980838
ENSMUSG00000081692	Gm15971	17	0.977967
ENSMUSG00000091455	Otogl	17	0.967701
ENSMUSG00000047161	Chst9	17	0.959673
ENSMUSG00000018845	Unc45b	17	0.943363
ENSMUSG00000054764	Mtnr1a	17	0.943294
ENSMUSG00000051354	Samd3	17	0.937191
ENSMUSG00000079070	Gm3985	17	0.934164
ENSMUSG00000026686	Lmx1a	17	0.922544
ENSMUSG00000021604	Irx4	17	0.921006
ENSMUSG00000091577	Gm6211	17	0.912049
ENSMUSG00000035258	Abi3bp	17	0.910961
ENSMUSG00000054169	Ceacam10	17	0.909086
ENSMUSG00000031734	Irx3	17	0.90057
ENSMUSG00000009376	Met	18	0.999424
ENSMUSG00000069378	Prdm6	18	0.987631
ENSMUSG00000030769	Slc5a11	18	0.975003
ENSMUSG00000049796	Crh	18	0.974337
ENSMUSG00000032006	Pdgfd	18	0.9661
ENSMUSG00000002228	Ppm1j	18	0.96043
ENSMUSG00000026826	Nr4a2	18	0.959412
ENSMUSG00000001988	Npas1	18	0.955852
ENSMUSG00000086282	Sox5os4	18	0.95381
ENSMUSG00000030110	Ret	18	0.942014
ENSMUSG00000036523	Greb1	18	0.92106
ENSMUSG00000020902	Ntn1	18	0.917357
ENSMUSG00000033377	Palmd	18	0.907823
ENSMUSG00000087022	9130024F11Rik	19	1
ENSMUSG00000038331	Satb2	19	0.996008
ENSMUSG00000025572	Tmc6	19	0.978516
ENSMUSG00000098257	Gm27169	19	0.961608
ENSMUSG00000097834	Gm26911	19	0.956878
ENSMUSG00000029219	Slc10a4	19	0.955051
ENSMUSG00000032122	Slc37a2	19	0.943506
ENSMUSG00000021697	Depdc1b	19	0.943446
ENSMUSG00000022371	Col14a1	19	0.942088
ENSMUSG00000099938	C030007H22Rik	19	0.935739
ENSMUSG00000101288	Gm28342	19	0.935604
ENSMUSG00000044976	Wdr72	19	0.933263
ENSMUSG00000022206	Npr3	19	0.933178
ENSMUSG00000045053	Kcng3	19	0.928948
ENSMUSG00000020467	Efemp1	19	0.925486
ENSMUSG00000022150	Dab2	19	0.921891
ENSMUSG00000046782	Ttc6	19	0.918623
ENSMUSG00000022303	Dcstamp	19	0.913187
ENSMUSG00000017493	Igfbp4	19	0.91312
ENSMUSG00000035258	Abi3bp	19	0.91228
ENSMUSG00000047161	Chst9	19	0.911115
ENSMUSG00000021919	Chat	19	0.900357
ENSMUSG00000019913	Sim1	20	0.999155
ENSMUSG00000021506	Pitx1	20	0.989666
ENSMUSG00000021318	Gli3	20	0.981186
ENSMUSG00000098682	Otx2os1	20	0.977622
ENSMUSG00000036907	C1ql2	20	0.967589
ENSMUSG00000026873	Phf19	20	0.966931
ENSMUSG00000019890	Nts	20	0.947086
ENSMUSG00000021848	Otx2	20	0.944751
ENSMUSG00000046167	Gldn	20	0.916584
ENSMUSG00000042655	Shisal2b	20	0.910549
ENSMUSG00000043659	Npsr1	20	0.905166
ENSMUSG00000045515	Pou3f3	20	0.903036
ENSMUSG00000089787	Gm15825	21	0.997967
ENSMUSG00000032359	Ctsh	21	0.990777
ENSMUSG00000042596	Tfap2d	21	0.990361
ENSMUSG00000024985	Tcf7l2	21	0.984935
ENSMUSG00000078958	Atp6ap1l	21	0.971359
ENSMUSG00000027833	Shox2	21	0.961206
ENSMUSG00000055435	Maf	21	0.95957
ENSMUSG00000023243	Kcnk5	21	0.951321
ENSMUSG00000051747	Ttn	21	0.950991
ENSMUSG00000028172	Tacr3	21	0.929324
ENSMUSG00000029313	Aff1	21	0.926258
ENSMUSG00000043822	Adamtsl5	21	0.916985
ENSMUSG00000022237	Ankrd33b	21	0.91346
ENSMUSG00000031688	Pou4f2	21	0.912321
ENSMUSG00000030717	Nupr1	21	0.908649
ENSMUSG00000028631	Kcnq4	21	0.905249
ENSMUSG00000035513	Ntng2	21	0.903864
ENSMUSG00000043850	Clrn1	22	0.997118
ENSMUSG00000042353	Frem3	22	0.992271
ENSMUSG00000069132	Nxph2	22	0.990695
ENSMUSG00000034384	Barhl2	22	0.980479
ENSMUSG00000024907	Gal	22	0.976023
ENSMUSG00000073804	Nps	22	0.975843
ENSMUSG00000031616	Ednra	22	0.962821
ENSMUSG00000031927	1700012B09Rik	22	0.950103
ENSMUSG00000063260	Syt10	22	0.946584
ENSMUSG00000083050	Gm11242	22	0.945481
ENSMUSG00000026826	Nr4a2	22	0.944606
ENSMUSG00000032511	Scn5a	22	0.944336
ENSMUSG00000045532	C1ql1	22	0.932046
ENSMUSG00000087277	2010013B24Rik	22	0.919624
ENSMUSG00000028864	Hgf	22	0.918706
ENSMUSG00000045165	AI467606	22	0.90175
ENSMUSG00000056380	Gpr50	23	0.99542
ENSMUSG00000035557	Krt17	23	0.992652
ENSMUSG00000086349	Gm13497	23	0.988994
ENSMUSG00000025013	Tll2	23	0.961716
ENSMUSG00000031492	Chrnb3	23	0.961138
ENSMUSG00000034555	Tex16	23	0.945172
ENSMUSG00000044393	Dsg2	23	0.932511
ENSMUSG00000036198	Arhgap36	23	0.931355
ENSMUSG00000071847	Apcdd1	23	0.929665
ENSMUSG00000085257	Gm13264	23	0.915198
ENSMUSG00000044988	Ucn3	24	0.998724
ENSMUSG00000026193	Fn1	24	0.987648
ENSMUSG00000044017	Adgrd1	24	0.979793
ENSMUSG00000100005	B130024G19Rik	24	0.973125
ENSMUSG00000020963	Tshr	24	0.966915
ENSMUSG00000032220	Myo1e	24	0.942848
ENSMUSG00000018500	Adora2b	24	0.938865
ENSMUSG00000051079	Rgs13	24	0.933562
ENSMUSG00000030551	Nr2f2	24	0.931156
ENSMUSG00000034224	Slc38a8	24	0.929478
ENSMUSG00000101559	Gm28258	24	0.918725
ENSMUSG00000029819	Npy	24	0.917886
ENSMUSG00000053004	Hrh1	24	0.917271
ENSMUSG00000087365	C430049B03Rik	24	0.903968
ENSMUSG00000019846	Lama4	25	0.993845
ENSMUSG00000021359	Tfap2a	25	0.985476
ENSMUSG00000032332	Col12a1	25	0.980809
ENSMUSG00000097752	Gm26688	25	0.970158
ENSMUSG00000026994	Galnt3	25	0.966882
ENSMUSG00000026483	Niban1	25	0.964394
ENSMUSG00000026778	Prkcq	25	0.95403
ENSMUSG00000050473	Slc35d3	25	0.948731
ENSMUSG00000046748	Tmem45a2	25	0.94506
ENSMUSG00000032369	Plscr1	25	0.942779
ENSMUSG00000032377	Plscr4	25	0.942092
ENSMUSG00000092196	Gm38505	25	0.935514
ENSMUSG00000046561	Arsj	25	0.921962
ENSMUSG00000061762	Tac1	25	0.913169
ENSMUSG00000073530	Pappa2	25	0.911892
ENSMUSG00000049115	Agtr1a	25	0.911227
ENSMUSG00000042453	Reln	25	0.909693
ENSMUSG00000033063	Cntnap3	25	0.905176
ENSMUSG00000025780	Itih5	25	0.902298
ENSMUSG00000031130	Brs3	26	0.999453
ENSMUSG00000026147	Col9a1	26	0.992177
ENSMUSG00000094627	Gm10182	26	0.973467
ENSMUSG00000097516	4930467D21Rik	26	0.971943
ENSMUSG00000050103	Agmo	26	0.964458
ENSMUSG00000085996	A830012C17Rik	26	0.961771
ENSMUSG00000019846	Lama4	26	0.96141
ENSMUSG00000097652	Mhrt	26	0.957743
ENSMUSG00000051029	Serpinb1b	26	0.952873
ENSMUSG00000028004	Npy2r	26	0.938763
ENSMUSG00000103885	Gm37006	26	0.937285
ENSMUSG00000032667	Pon2	26	0.934271
ENSMUSG00000021411	Pxdc1	26	0.913254
ENSMUSG00000030043	Tacr1	26	0.902176
ENSMUSG00000090088	Gm15934	27	0.990966
ENSMUSG00000078982	Gm11025	27	0.986027
ENSMUSG00000031492	Chrnb3	27	0.984889
ENSMUSG00000031130	Brs3	27	0.977908
ENSMUSG00000071317	Bves	27	0.975068
ENSMUSG00000019848	Popdc3	27	0.967031
ENSMUSG00000086349	Gm13497	27	0.963032
ENSMUSG00000005220	Corin	27	0.959683
ENSMUSG00000099150	Gm27243	27	0.954366
ENSMUSG00000026778	Prkcq	27	0.94408
ENSMUSG00000001119	Col6a1	27	0.942059
ENSMUSG00000051029	Serpinb1b	27	0.939592
ENSMUSG00000067285	Gm16223	27	0.935623
ENSMUSG00000093386	1700120O09Rik	27	0.926942
ENSMUSG00000027347	Rasgrp1	27	0.910217
ENSMUSG00000023078	Cxcl13	28	0.987833
ENSMUSG00000043719	Col6a6	28	0.985712
ENSMUSG00000085257	Gm13264	28	0.982961
ENSMUSG00000030249	Abcc9	28	0.980524
ENSMUSG00000101955	Tuba5-ps	28	0.980049
ENSMUSG00000024553	Galr1	28	0.973041
ENSMUSG00000025780	Itih5	28	0.964514
ENSMUSG00000054988	Agtr1b	28	0.963154
ENSMUSG00000046561	Arsj	28	0.958327
ENSMUSG00000026976	Pax8	28	0.95706
ENSMUSG00000035258	Abi3bp	28	0.950989
ENSMUSG00000026726	Cubn	28	0.947601
ENSMUSG00000044034	Npb	28	0.945082
ENSMUSG00000025013	Tll2	28	0.924065
ENSMUSG00000021359	Tfap2a	28	0.92207
ENSMUSG00000026778	Prkcq	28	0.920721
ENSMUSG00000022206	Npr3	28	0.920031
ENSMUSG00000098682	Otx2os1	29	1
ENSMUSG00000021848	Otx2	29	0.990893
ENSMUSG00000026786	Apbb1ip	29	0.968377
ENSMUSG00000087539	Gm13584	29	0.965056
ENSMUSG00000002699	Lcp2	29	0.956752
ENSMUSG00000021506	Pitx1	29	0.954423
ENSMUSG00000086126	Evx1os	29	0.921903
ENSMUSG00000028004	Npy2r	29	0.90753
ENSMUSG00000099907	Gm10421	29	0.906748
ENSMUSG00000044211	Gm7887	29	0.90174
ENSMUSG00000025090	Ccdc172	30	0.999263
ENSMUSG00000031364	Grpr	30	0.978076
ENSMUSG00000016128	Stard13	30	0.969467
ENSMUSG00000098220		30	0.968026
ENSMUSG00000026315	Serpinb8	30	0.951547
ENSMUSG00000026994	Galnt3	30	0.945456
ENSMUSG00000046818	Ddit4l	30	0.941869
ENSMUSG00000026686	Lmx1a	30	0.92829
ENSMUSG00000049001	Ndnf	30	0.913484
ENSMUSG00000085842	Pard3bos1	30	0.903209
ENSMUSG00000024087	Cyp1b1	31	0.989653
ENSMUSG00000007655	Cav1	31	0.988639
ENSMUSG00000000214	Th	31	0.987324
ENSMUSG00000085129	5031425F14Rik	31	0.976791
ENSMUSG00000101730	Gm28580	31	0.976667
ENSMUSG00000101011	Gm29398	31	0.969826
ENSMUSG00000033053	1700028P14Rik	31	0.969796
ENSMUSG00000027400	Pdyn	31	0.967782
ENSMUSG00000033502	Cdc14a	31	0.962934
ENSMUSG00000085427	6430710C18Rik	31	0.960777
ENSMUSG00000060735	Rxfp3	31	0.93992
ENSMUSG00000031274	Col4a5	31	0.93028
ENSMUSG00000052861	Dnah6	31	0.920744
ENSMUSG00000042010	Acacb	31	0.920064
ENSMUSG00000026826	Nr4a2	31	0.9167
ENSMUSG00000026679	Enkur	31	0.912402
ENSMUSG00000022245	Skor1	32	0.996588
ENSMUSG00000047935	Sox1ot	32	0.986583
ENSMUSG00000026468	Lhx4	32	0.979941
ENSMUSG00000082148	Gm12266	32	0.976462
ENSMUSG00000092196	Gm38505	32	0.973518
ENSMUSG00000033268	Duox1	32	0.970725
ENSMUSG00000092355		32	0.956482
ENSMUSG00000086541	Has2os	32	0.955753
ENSMUSG00000053747	Sox14	32	0.951212
ENSMUSG00000027833	Shox2	32	0.946477
ENSMUSG00000021239	Vsx2	32	0.917127
ENSMUSG00000029595	Lhx5	32	0.915592
ENSMUSG00000086709	Gm16263	32	0.907664
ENSMUSG00000019935	Slc17a8	32	0.905762
ENSMUSG00000022952	Runx1	33	0.995163
ENSMUSG00000011118	Panx3	33	0.992825
ENSMUSG00000036446	Lum	33	0.986695
ENSMUSG00000019929	Dcn	33	0.985862
ENSMUSG00000085324	Gm11680	33	0.981128
ENSMUSG00000005952	Trpv1	33	0.978829
ENSMUSG00000093650	Gm20631	33	0.972883
ENSMUSG00000005087	Cd44	33	0.969528
ENSMUSG00000020310	Madcam1	33	0.969369
ENSMUSG00000034009	Rxfp1	33	0.965952
ENSMUSG00000036915	Kirrel2	33	0.965046
ENSMUSG00000078958	Atp6ap1l	33	0.955986
ENSMUSG00000046818	Ddit4l	33	0.953045
ENSMUSG00000090291	Lrrc10b	33	0.948186
ENSMUSG00000036040	Adamtsl2	33	0.942924
ENSMUSG00000066842	Hmcn1	33	0.937785
ENSMUSG00000022483	Col2a1	33	0.92799
ENSMUSG00000045165	AI467606	33	0.922251
ENSMUSG00000026117	Zap70	33	0.921353
ENSMUSG00000002944	Cd36	33	0.919679
ENSMUSG00000103334	Gm29771	33	0.908552
ENSMUSG00000093452	Zfhx2os	33	0.905914
ENSMUSG00000027009	Itga4	33	0.903042
ENSMUSG00000030889	Vwa3a	33	0.902716
ENSMUSG00000024206	Rfx2	33	0.900584
ENSMUSG00000013584	Aldh1a2	34	0.999335
ENSMUSG00000023828	Slc22a3	34	0.989885
ENSMUSG00000032128	Robo3	34	0.986697
ENSMUSG00000030069	Prok2	34	0.972593
ENSMUSG00000023964	Calcr	34	0.96328
ENSMUSG00000074575	Kcng1	34	0.950747
ENSMUSG00000104420	E230020A03Rik	34	0.930041
ENSMUSG00000007655	Cav1	34	0.928992
ENSMUSG00000054934	Kcnmb4	34	0.920277
ENSMUSG00000029123	Stk32b	34	0.913852
ENSMUSG00000047344	Lancl3	34	0.909765
ENSMUSG00000085171	D830026I12Rik	35	0.992605
ENSMUSG00000054169	Ceacam10	35	0.988732
ENSMUSG00000072601	Ear1	35	0.987435
ENSMUSG00000085500	Gm16976	35	0.971463
ENSMUSG00000010461	Eya4	35	0.970958
ENSMUSG00000022303	Dcstamp	35	0.969677
ENSMUSG00000022315	Slc30a8	35	0.966787
ENSMUSG00000038331	Satb2	35	0.953921
ENSMUSG00000029484	Anxa3	35	0.952887
ENSMUSG00000063564	Col23a1	35	0.951016
ENSMUSG00000087022	9130024F11Rik	35	0.949654
ENSMUSG00000026315	Serpinb8	35	0.942443
ENSMUSG00000100000	1700023F02Rik	35	0.938562
ENSMUSG00000022371	Col14a1	35	0.92335
ENSMUSG00000103711	Tstd1	35	0.918739
ENSMUSG00000099706	Gm29536	35	0.904623
ENSMUSG00000100009	Gm7967	35	0.900133
ENSMUSG00000048582	Gja3	36	0.996078
ENSMUSG00000089988	Gm16238	36	0.993538
ENSMUSG00000082587	Gm12129	36	0.990507
ENSMUSG00000085896	5330429C05Rik	36	0.984045
ENSMUSG00000022512	Cldn1	36	0.97121
ENSMUSG00000086236	5830418P13Rik	36	0.970614
ENSMUSG00000087388	Gm12128	36	0.944882
ENSMUSG00000048038	Ccdc187	36	0.94115
ENSMUSG00000033060	Lmo7	36	0.937555
ENSMUSG00000028369	Svep1	36	0.928815
ENSMUSG00000033053	1700028P14Rik	36	0.922512
ENSMUSG00000085743	8430419K02Rik	36	0.920467
ENSMUSG00000033063	Cntnap3	36	0.917588
ENSMUSG00000041695	Kcnj2	36	0.914669
ENSMUSG00000025090	Ccdc172	36	0.912365
ENSMUSG00000034009	Rxfp1	36	0.90074
ENSMUSG00000030553	Pgpep1l	36	0.900557
ENSMUSG00000022237	Ankrd33b	36	0.900384
ENSMUSG00000049515	Espnl	37	0.992814
ENSMUSG00000054200	Ffar4	37	0.991935
ENSMUSG00000034384	Barhl2	37	0.985267
ENSMUSG00000006538	Ihh	37	0.976038
ENSMUSG00000055102	Zfp819	37	0.974819
ENSMUSG00000097071	4930544I03Rik	37	0.965994
ENSMUSG00000025754	Agbl1	37	0.951431
ENSMUSG00000102437		37	0.947631
ENSMUSG00000042596	Tfap2d	37	0.942963
ENSMUSG00000027833	Shox2	37	0.931036
ENSMUSG00000038300	Pth2	38	0.999256
ENSMUSG00000073804	Nps	38	0.985415
ENSMUSG00000080934	Gm12931	38	0.983129
ENSMUSG00000041482	Piezo2	38	0.979627
ENSMUSG00000044211	Gm7887	38	0.975813
ENSMUSG00000068680	Gm10248	38	0.97378
ENSMUSG00000045532	C1ql1	38	0.965053
ENSMUSG00000053368	Rxfp2	38	0.956218
ENSMUSG00000079070	Gm3985	38	0.948322
ENSMUSG00000045518	Onecut3	38	0.942153
ENSMUSG00000029658	Wdr95	38	0.931537
ENSMUSG00000004366	Sst	38	0.923647
ENSMUSG00000044167	Foxo1	38	0.907622
ENSMUSG00000045731	Pnoc	38	0.901478
ENSMUSG00000026976	Pax8	39	0.993969
ENSMUSG00000051910	Sox6	39	0.993827
ENSMUSG00000044156	Hepacam2	39	0.985748
ENSMUSG00000085620	G630018N14Rik	39	0.973545
ENSMUSG00000036357	Gpr101	39	0.960794
ENSMUSG00000097593	Gm26676	39	0.947779
ENSMUSG00000023964	Calcr	39	0.938613
ENSMUSG00000034185	6430628N08Rik	39	0.934389
ENSMUSG00000081520	Gm16200	39	0.919625
ENSMUSG00000020902	Ntn1	39	0.919156
ENSMUSG00000045731	Pnoc	39	0.916822
ENSMUSG00000059991	Nptx2	39	0.91338
ENSMUSG00000001119	Col6a1	39	0.900729
ENSMUSG00000021647	Cartpt	40	0.998188
ENSMUSG00000053113	Socs3	40	0.993712
ENSMUSG00000019762	Iyd	40	0.98553
ENSMUSG00000037362	Ccn3	40	0.983374
ENSMUSG00000085533	Gm12146	40	0.978203
ENSMUSG00000013483	Card14	40	0.973419
ENSMUSG00000048776	Pthlh	40	0.966762
ENSMUSG00000040809	Chil3	40	0.950541
ENSMUSG00000023484	Prph	40	0.94333
ENSMUSG00000032702	Kank1	40	0.939103
ENSMUSG00000024206	Rfx2	40	0.931085
ENSMUSG00000087388	Gm12128	40	0.930565
ENSMUSG00000047497	Adamts12	40	0.914625
ENSMUSG00000059049	Frem1	40	0.913049
ENSMUSG00000030110	Ret	40	0.906067
ENSMUSG00000029381	Shroom3	40	0.901943
ENSMUSG00000063594	Gng8	41	0.991807
ENSMUSG00000073599	Ecscr	41	0.987654
ENSMUSG00000029759	Pon3	41	0.976931
ENSMUSG00000029188	Slc34a2	41	0.972862
ENSMUSG00000027568	Ntsr1	41	0.967776
ENSMUSG00000092137		41	0.963118
ENSMUSG00000021367	Edn1	41	0.960508
ENSMUSG00000065934	Gm25630	41	0.950019
ENSMUSG00000042793	Lgr6	41	0.947907
ENSMUSG00000021765	Fst	41	0.944121
ENSMUSG00000023959	Clic5	41	0.94373
ENSMUSG00000040605	Bace2	41	0.941557
ENSMUSG00000096606	Tpbgl	41	0.938746
ENSMUSG00000048636	A730049H05Rik	41	0.934669
ENSMUSG00000042607	Asb4	41	0.929259
ENSMUSG00000002588	Pon1	41	0.927267
ENSMUSG00000023886	Smoc2	41	0.922055
ENSMUSG00000032667	Pon2	41	0.919166
ENSMUSG00000031927	1700012B09Rik	41	0.913299
ENSMUSG00000032528	Vipr1	41	0.910435
ENSMUSG00000041361	Myzap	41	0.906681
ENSMUSG00000015053	Gata2	42	0.989235
ENSMUSG00000048763	Hoxb3	42	0.981915
ENSMUSG00000039728	Slc6a5	42	0.980233
ENSMUSG00000075588	Hoxb2	42	0.977571
ENSMUSG00000101429	BC055402	42	0.965846
ENSMUSG00000028717	Tal1	42	0.958514
ENSMUSG00000015619	Gata3	42	0.957726
ENSMUSG00000084844	Hoxb3os	42	0.957151
ENSMUSG00000086496	Gm14204	42	0.950596
ENSMUSG00000096045	Gm21698	42	0.948664
ENSMUSG00000085338	2410004I01Rik	42	0.947698
ENSMUSG00000056445	Hoxaas2	42	0.942114
ENSMUSG00000101764	4930556G22Rik	42	0.941767
ENSMUSG00000034533	Scn10a	42	0.941463
ENSMUSG00000085582	3110099E03Rik	42	0.934734
ENSMUSG00000001506	Col1a1	42	0.934577
ENSMUSG00000087264	Gad1os	42	0.932026
ENSMUSG00000019935	Slc17a8	42	0.91929
ENSMUSG00000087211	Lhx1os	42	0.908626
ENSMUSG00000046748	Tmem45a2	42	0.903186
ENSMUSG00000041523	Upk2	43	0.978359
ENSMUSG00000022821	Hgd	43	0.963175
ENSMUSG00000081494	Gm14130	43	0.963175
ENSMUSG00000028612	Lrp8os1	43	0.963175
ENSMUSG00000025900	Rp1	43	0.958954
ENSMUSG00000100156	Gm29053	43	0.958954
ENSMUSG00000088558	Gm22506	43	0.943565
ENSMUSG00000086455	Gm11815	43	0.943565
ENSMUSG00000047751	Utf1	43	0.943565
ENSMUSG00000098755		43	0.91393
ENSMUSG00000029380	Cxcl1	43	0.91393
ENSMUSG00000087155	Gm15008	43	0.91393
ENSMUSG00000085221	Gm11309	44	0.998547
ENSMUSG00000055134	9130017K11Rik	44	0.985982
ENSMUSG00000082178	Gm11307	44	0.981842
ENSMUSG00000030214	Plbd1	44	0.962037
ENSMUSG00000090795	Gm7346	44	0.960107
ENSMUSG00000035522	Tsga8	44	0.957244
ENSMUSG00000074344	Tmigd3	44	0.948897
ENSMUSG00000093749	4921523L03Rik	44	0.948897
ENSMUSG00000084773	Gm12159	44	0.94055
ENSMUSG00000093531	Vmn2r-ps117	44	0.94055
ENSMUSG00000001403	Ube2c	44	0.94055
ENSMUSG00000050288	Fzd2	44	0.938795
ENSMUSG00000102590	Mannr	44	0.937478
ENSMUSG00000069292	Vmn1r199	44	0.935281
ENSMUSG00000083413	Vmn1r-ps110	44	0.935281
ENSMUSG00000044375	Pcare	44	0.935281
ENSMUSG00000041730	Prrxl1	44	0.934373
ENSMUSG00000103357	Gm7804	44	0.933855
ENSMUSG00000026193	Fn1	44	0.915427
ENSMUSG00000081717	Vmn1r-ps106	44	0.913249
ENSMUSG00000065658	Gm23102	44	0.913249
ENSMUSG00000090589	Gm17180	44	0.913249
ENSMUSG00000090041	Gm16027	44	0.911319
ENSMUSG00000020905	Usp43	44	0.906942
ENSMUSG00000084011	Gm12969	44	0.904857
ENSMUSG00000054046	Klk13	44	0.904857
ENSMUSG00000024485	Slc4a9	44	0.900485
ENSMUSG00000089143	Gm25268	45	0.969444
ENSMUSG00000082402	Gm15621	45	0.969444
ENSMUSG00000082926	Gm8172	45	0.969444
ENSMUSG00000086124	A530076I17Rik	45	0.952878
ENSMUSG00000070692	Rps12-ps10	45	0.951174
ENSMUSG00000093962	Gm11756	45	0.931383
ENSMUSG00000097754	Ptgs2os2	45	0.916627
ENSMUSG00000021741	Gm5457	45	0.916627
ENSMUSG00000027517	Ankrd60	45	0.916627
ENSMUSG00000054537	Tmprss11e	45	0.916627
ENSMUSG00000100546	Gm29483	45	0.910401
ENSMUSG00000100182	1810006J02Rik	45	0.910401
ENSMUSG00000087647	Gm15407	45	0.910401
ENSMUSG00000091102	5830462I19Rik	46	0.995365
ENSMUSG00000064541	Gm22978	46	0.966233
ENSMUSG00000084316	Gm8668	46	0.960317
ENSMUSG00000103260	Gm8146	46	0.952452
ENSMUSG00000081814	Gm14695	46	0.952452
ENSMUSG00000069972	Rps13-ps2	46	0.940621
ENSMUSG00000101924		46	0.940621
ENSMUSG00000058396	Gpr182	46	0.935911
ENSMUSG00000076890	Traj40	46	0.92879
ENSMUSG00000051237	9230109A22Rik	46	0.92879
ENSMUSG00000023577		46	0.926714
ENSMUSG00000049427	Gm9837	46	0.924137
ENSMUSG00000024124	Prss30	46	0.924137
ENSMUSG00000098794	Gm28038	46	0.924137
ENSMUSG00000079387	Luzp4	46	0.903178
ENSMUSG00000095318	Gm8024	47	0.972482
ENSMUSG00000069515	Lyz1	47	0.961163
ENSMUSG00000092981	Mir5125	47	0.9554
ENSMUSG00000087587	Gm15245	47	0.950228
ENSMUSG00000086109	Gm13391	47	0.941541
ENSMUSG00000085194	Platr32	47	0.941541
ENSMUSG00000022479	Vdr	47	0.937187
ENSMUSG00000039158	Akna	47	0.932565
ENSMUSG00000098989	Mir7223	47	0.932033
ENSMUSG00000044697	Gm5479	47	0.932033
ENSMUSG00000075525	Gm10849	47	0.932033
ENSMUSG00000102882	Gm2065	47	0.932033
ENSMUSG00000037984	Neurod6	47	0.931527
ENSMUSG00000093146		47	0.920402
ENSMUSG00000059588	Calcrl	47	0.914503
ENSMUSG00000088151	Gm26347	47	0.907127
ENSMUSG00000098894	Gm27234	47	0.907127
ENSMUSG00000067835	Gm14661	47	0.904163
